# Supplementary material for: Integrating Pathways of Parkinson's Disease in a Molecular Interaction Map
Source: PubMed Central journal article supplement — Mol Neurobiol. 2013 Jul 7;49(1):88–102. doi: 10.1007/s12035-013-8489-4 (PMC4153395; doi:10.1007/s12035-013-8489-4), 2013-07-07
Supplement: 12035_2013_8489_MOESM3_ESM.pdf [file 12035_2013_8489_MOESM3_ESM.pdf]

## **Network analysis of the PD map: Centrality scoring**

### **Integrating pathways of Parkinson's disease in a molecular interaction map**

#### ***Molecular Neurobiology***

*Kazuhiro Fujita, Marek Ostaszewski, Yukiko Matsuoka, Samik Ghosh, Enrico Glaab, Christophe Trefois, Isaac Crespo, Thanneer M. Perumal, Wiktor Jurkowski, Paul MA Antony, Nico Diederich, Manuel Buttini, Akihiko Kodama, Venkata P. Satagopam, Serge Eifes, Antonio del Sol, Reinhard Schneider, Hiroaki Kitano, Rudi Balling<sup>#</sup>*

# corresponding author:

Luxembourg Centre for Systems Biomedicine (LCSB), University of Luxembourg

7, avenue des Hauts-Fourneaux, L-4362 Esch-sur-Alzette

Tel: 0352-466644-6922 (office); 0352-621168-425 (mobile)

Fax: +352-466644-6949

Email: [rudi.balling@uni.lu](mailto:rudi.balling@uni.lu)

## Supplementary Table 1: Centrality analysis of the PD map

This file contains the list of PD map elements prioritized according to their centrality in the PD map, with respect to their incoming, outgoing and overall interactions.

| Inward Information<br>Node Names (Position)            | Scores |
|--------------------------------------------------------|--------|
| 'H+(Mitochondrial Inner membrane)'                     | 941.33 |
| 'NADH(Mitochondrial Inner membrane)'                   | 940.33 |
| 'Mitochondrial dysfunction(default)'                   | 939.67 |
| 'Acetyl-CoA(Mitochondrial Inner membrane)'             | 930.17 |
| 'FADH2(Mitochondrial Inner membrane)'                  | 929.33 |
| 'CoA-SH(Mitochondrial Inner membrane)'                 | 929.33 |
| '2-Oxoglutarate(Mitochondrial Inner membrane)'         | 922.00 |
| 'L-Malate (Mitochondrial Inner membrane)'              | 920.67 |
| 'NAD+(Mitochondrial Inner membrane)'                   | 917.67 |
| 'Acetyl-CoA (Mitochondrial Inner membrane)'            | 915.33 |
| 'Acetaldehyde(cytosol)'                                | 915.17 |
| 'CO2 (Mitochondrial Inner membrane)'                   | 912.50 |
| 'acetoacetyl-CoA(Mitochondrial Inner membrane)'        | 911.33 |
| 'ROS(Mitochondrial Inner membrane)'                    | 911.00 |
| 'ADP(cytosol)'                                         | 910.17 |
| 'Succinate(Mitochondrial Inner membrane)'              | 907.83 |
| 'Succinyl-CoA(Mitochondrial Inner membrane)'           | 906.50 |
| 'H2O(Mitochondrial Inner membrane)'                    | 903.83 |
| 'D-beta hydroxybutyrate(Mitochondrial Inner membrane)' | 902.50 |
| 'Oxaloacetate (Mitochondrial Inner membrane)'          | 899.67 |
| 'NADP+(Mitochondrial Inner membrane)'                  | 899.33 |
| 'Carnitine(Mitochondrial Inner membrane)'              | 896.67 |
| 'ADP(Mitochondrial Inner membrane)'                    | 896.33 |
| 'trans-Dec-2-enoyl-CoA(Mitochondrial Inner membrane)'  | 892.33 |
| 'ubiquinol(Mitochondrial Inner membrane)'              | 890.17 |
| 'Pyruvate (cytosol)'                                   | 889.83 |
| 'H2O(cytosol)'                                         | 888.83 |

|                                                                                |        |
|--------------------------------------------------------------------------------|--------|
| '3-trans-decenoyl-CoA(Mitochondrial Inner membrane)'                           | 888.17 |
| 'membrane potential(Mitochondrial Inner membrane)'                             | 887.67 |
| 'Citrate(Mitochondrial Inner membrane)'                                        | 886.33 |
| 'AMP(cytosol)'                                                                 | 883.17 |
| 'CoA-SH(cytosol)'                                                              | 882.50 |
| 'CO2(Mitochondrial Inner membrane)'                                            | 881.67 |
| 'L-Lactate (cytosol)'                                                          | 879.50 |
| 'H+(Mitochondrial outer membrane)'                                             | 877.00 |
| 'TXN(Mitochondrial Inner membrane)'                                            | 875.83 |
| 'Fumarate (Mitochondrial Inner membrane)'                                      | 874.67 |
| 'Neuroinflammation(default)'                                                   | 873.00 |
| '4-cis-decenoyl-CoA(Mitochondrial Inner membrane)'                             | 872.33 |
| 'Ethanol(cytosol)'                                                             | 871.67 |
| 'ADP (Mitochondrial Inner membrane)'                                           | 870.00 |
| 'alpha-D-Glucose 6-phosphate(cytosol)'                                         | 869.67 |
| 'phosphohrylated pyruvate dehydrogenase complex(Mitochondrial Inner membrane)' | 868.67 |
| 'NAD+(cytosol)'                                                                | 868.50 |
| 'Acetoacetyl-CoA(Mitochondrial Inner membrane)'                                | 868.50 |
| 'NAD+ (Mitochondrial Inner membrane)'                                          | 867.83 |
| 'NADP+(cytosol)'                                                               | 866.83 |
| 'acetoacetate(Mitochondrial Inner membrane)'                                   | 865.67 |
| 'ATP(Mitochondrial Inner membrane)'                                            | 865.00 |
| 'Isolation membrane (IM)(cytosol)'                                             | 863.17 |
| 'Orthophosphate (Mitochondrial Inner membrane)'                                | 862.00 |
| 'pyruvate dehydrogenase complex(Mitochondrial Inner membrane)'                 | 860.67 |
| 'CoA-SH (Mitochondrial Inner membrane)'                                        | 860.50 |
| 'cis-cis-3-6-Dodecadienoyl-CoA(Mitochondrial Inner membrane)'                  | 859.67 |
| 'H2O2(Mitochondrial Inner membrane)'                                           | 859.33 |
| 'Protein misfolding(default)'                                                  | 857.00 |
| 'beta-D-Fructose 1-6-bisphosphate(cytosol)'                                    | 856.33 |
| 'Acetoacetate(Mitochondrial Inner membrane)'                                   | 853.17 |
| 'PPi(cytosol)'                                                                 | 852.50 |
| 'misfolded protein(cytosol)'                                                   | 850.67 |
| 'Orthophosphate(cytosol)'                                                      | 850.17 |

|                                                                              |        |
|------------------------------------------------------------------------------|--------|
| 'NADH(cytosol)'                                                              | 847.50 |
| 'D-Glyceraldehyde 3-phosphate(cytosol)'                                      | 846.33 |
| 'H+(cytosol)'                                                                | 846.17 |
| 'Complex_br_(ubiquitin/E1)(cytosol)'                                         | 846.00 |
| 'Orthophosphate(Mitochondrial Inner membrane)'                               | 845.83 |
| 'G3P(cytosol)'                                                               | 845.00 |
| 'CO2(cytosol)'                                                               | 843.50 |
| 'beta-D-Glucose 6-phosphate(cytosol)'                                        | 842.33 |
| '1-3-Bisphospho-D-glycerate(cytosol)'                                        | 841.67 |
| 'NADPH(Mitochondrial Inner membrane)'                                        | 841.00 |
| 'CYCS(cytosol)'                                                              | 840.17 |
| 'ubiquinone(Mitochondrial Inner membrane)'                                   | 838.50 |
| 'DAG(cytosol)'                                                               | 837.83 |
| 'CYCS(Mitochondrial Inner membrane)'                                         | 837.50 |
| 'Pi(cytosol)'                                                                | 836.67 |
| 'HMG CoA(Mitochondrial Inner membrane)'                                      | 833.00 |
| 'YWHAB(cytosol)'                                                             | 832.83 |
| '(S)-Hydroxydecanoyl-CoA(Mitochondrial Inner membrane)'                      | 832.50 |
| 'CYCS(Mitochondrial Inner membrane)'                                         | 830.83 |
| 'GSSG(Mitochondrial Inner membrane)'                                         | 829.00 |
| 'trans-Oct-2-enoyl-CoA(Mitochondrial Inner membrane)'                        | 829.00 |
| 'Succinate dehydrogenase (complex II)(Mitochondrial Inner membrane)'         | 828.83 |
| 'FAD(Mitochondrial Inner membrane)'                                          | 828.17 |
| 'palmitoyl-CoA(cytosol)'                                                     | 828.00 |
| '(S)-Hydroxyoctanoyl-CoA(Mitochondrial Inner membrane)'                      | 826.83 |
| 'ATP-sensitive K+ channel(Mitochondrial Inner membrane)'                     | 826.50 |
| '3-Oxodecanoyl-CoA(Mitochondrial Inner membrane)'                            | 826.33 |
| '3-Phospho-D-glycerate(cytosol)'                                             | 825.67 |
| 'GTP(Mitochondrial Inner membrane)'                                          | 823.50 |
| 'Docked dopamine loaded synaptic vesicle(Docked DA loaded synaptic vesicle)' | 819.00 |
| 'Cytochrome C:Apaf-1:ATP:Pro-caspase-9(cytosol)'                             | 816.67 |
| 'ATP(cytosol)'                                                               | 816.33 |
| 'palmitoyl-CoA(Mitochondrial Inner membrane)'                                | 815.83 |
| 'O2(Mitochondrial Inner membrane)'                                           | 815.33 |

|                                                                    |        |
|--------------------------------------------------------------------|--------|
| 'beta-D-Fructose 6-phosphate(cytosol)'                             | 813.50 |
| '2-3-Bisphospho-D-glycerate(cytosol)'                              | 812.17 |
| 'D-methylmalonyl-CoA(Mitochondrial Inner membrane)'                | 809.17 |
| '3-Oxo-octanoyl-CoA(Mitochondrial Inner membrane)'                 | 809.17 |
| 'Pi(Mitochondrial Inner membrane)'                                 | 809.00 |
| 'K48 polyubiquitinated protein(cytosol)'                           | 808.67 |
| 'O2-(Mitochondrial Inner membrane)'                                | 807.00 |
| '(S)-3-Hydroxy-3-methylglutaryl-CoA(Mitochondrial Inner membrane)' | 801.67 |
| '4a-hydroxytetrahydrobiopterin(cytosol)'                           | 801.50 |
| 'L-Dopa(cytosol)'                                                  | 801.00 |
| '1-acyl LPA(cytosol)'                                              | 800.67 |
| 'TXN(cytosol)'                                                     | 800.17 |
| 'Octanoyl-CoA(Mitochondrial Inner membrane)'                       | 800.00 |
| 'AMPK(cytosol)'                                                    | 799.50 |
| 'TAG(cytosol)'                                                     | 798.17 |
| 'Ca2+(cytosol)'                                                    | 798.00 |
| 'misfolded transmembrane ER protein(ER)'                           | 797.83 |
| 'NF- $\kappa$ B:I $\kappa$ B(cytosol)'                             | 797.33 |
| 'Mitochondrial dysfunction(Mitochondrial Inner membrane)'          | 797.17 |
| 'Glycerone phosphate(cytosol)'                                     | 796.33 |
| '2-Phospho-D-glycerate(cytosol)'                                   | 796.17 |
| 'Failure of protein quality control(default)'                      | 795.83 |
| '(R)-2-hydroxyglutarate(Mitochondrial Inner membrane)'             | 794.00 |
| 'classic PI3K complex(cytosol)'                                    | 793.33 |
| 'succinate semialdehyde(Mitochondrial Inner membrane)'             | 793.00 |
| '1-2-diacyl-glycerol 3-phosphate(cytosol)'                         | 792.00 |
| 'H2O2(Mitochondrial outer membrane)'                               | 790.33 |
| '143B:phospho-BAD complex(cytosol)'                                | 788.33 |
| 'Hexanoyl-CoA(Mitochondrial Inner membrane)'                       | 788.17 |
| 'Oxaloacetate(cytosol)'                                            | 787.17 |
| 'CREB1(Nucleus)'                                                   | 785.67 |
| 'ADP(Mitochondrial outer membrane)'                                | 785.67 |
| 'arachidonoyl-CoA(cytosol)'                                        | 785.50 |
| 'Acetyl-CoA(cytosol)'                                              | 785.00 |

|                                                                |        |
|----------------------------------------------------------------|--------|
| 'TXN(Mitochondrial Inner membrane)'                            | 784.00 |
| '?-synuclein aggregation(cytosol)'                             | 783.33 |
| 'Pyruvate (Mitochondrial Inner membrane)'                      | 782.00 |
| 'SNARE complex(Docked DA loaded synaptic vesicle)'             | 781.67 |
| '(S)-Hydroxyhexanoyl-CoA(Mitochondrial Inner membrane)'        | 781.33 |
| 'H+ (Mitochondrial Inner membrane)'                            | 781.17 |
| '(S)-3-Hydroxyhexadecanoyl-CoA(Mitochondrial Inner membrane)'  | 781.00 |
| 'HVA(cytosol)'                                                 | 778.33 |
| '(S)-3-Hydroxybutanoyl-CoA(Mitochondrial Inner membrane)'      | 777.00 |
| '4-hydroxybutyrate(Mitochondrial Inner membrane)'              | 775.67 |
| '(S)-3-Hydroxydodecanoyl-CoA(Mitochondrial Inner membrane)'    | 775.67 |
| 'ubiquitin(cytosol)'                                           | 775.00 |
| 'Mitochondria Fission(Mitochondrial Inner membrane)'           | 773.67 |
| '(S)-3-Hydroxytetradecanoyl-CoA(Mitochondrial Inner membrane)' | 773.67 |
| 'Electron Leakage at Complex I(Mitochondrial Inner membrane)'  | 772.17 |
| 'GSH(Mitochondrial Inner membrane)'                            | 771.33 |
| '3-Oxohexanoyl-CoA(Mitochondrial Inner membrane)'              | 770.33 |
| 'Butanoyl-CoA(Mitochondrial Inner membrane)'                   | 770.00 |
| '2-trans-4-cis-decadienoyl-CoA(Mitochondrial Inner membrane)'  | 770.00 |
| 'OH-(Mitochondrial Inner membrane)'                            | 769.00 |
| 'myristoyl-CoA(Mitochondrial Inner membrane)'                  | 768.83 |
| '3-oxooctadecanoyl-CoA(cytosol)'                               | 768.33 |
| 'Mitochondria Fusion(Mitochondrial Inner membrane)'            | 768.00 |
| '3-Oxopalmitoyl-CoA(Mitochondrial Inner membrane)'             | 768.00 |
| 'Fe(III)(Mitochondrial Inner membrane)'                        | 767.67 |
| 'Decanoyl-CoA(Mitochondrial Inner membrane)'                   | 767.33 |
| 'mitochondria depolarization(Mitochondrial Inner membrane)'    | 767.17 |
| '3-Oxododecanoyl-CoA(Mitochondrial Inner membrane)'            | 766.00 |
| 'Lauroyl-CoA(Mitochondrial Inner membrane)'                    | 765.83 |
| 'TAK1(cytosol)'                                                | 765.00 |
| '3-Oxotetradecanoyl-CoA(Mitochondrial Inner membrane)'         | 764.33 |
| 'alpha-D-Glucose(cytosol)'                                     | 764.17 |
| 'Pi(cytosol)'                                                  | 763.17 |
| 'L-Lactate (default)'                                          | 763.17 |

|                                                                      |        |
|----------------------------------------------------------------------|--------|
| 'H_sub_2_endsub_O(Mitochondrial Inner membrane)'                     | 763.00 |
| 'ASK1 signalsome(cytosol)'                                           | 762.17 |
| 'a24_degraded(cytosol)'                                              | 762.17 |
| 'H+(default)'                                                        | 762.17 |
| 's4503(Mitochondrial Inner membrane)'                                | 760.83 |
| 'MAPT(cytosol)'                                                      | 760.33 |
| 'polyubiquitinated misfolded transmembrane ER protein(cytosol)'      | 759.50 |
| 'Carnitine(Mitochondrial outer membrane)'                            | 758.33 |
| 'PMAIP1(cytosol)'                                                    | 758.00 |
| 'BBC3(cytosol)'                                                      | 758.00 |
| 'Acetate(cytosol)'                                                   | 757.83 |
| 'BAD(cytosol)'                                                       | 757.50 |
| 'Dopamine loaded synaptic vesicle(DA loaded synaptic vesicle)'       | 755.83 |
| 'trans-Hexadec-2-enoyl-CoA(Mitochondrial Inner membrane)'            | 755.33 |
| 'Succinate dehydrogenase (complex II)(Mitochondrial Inner membrane)' | 754.00 |
| 'trans-Hex-2-enoyl-CoA(Mitochondrial Inner membrane)'                | 753.67 |
| 'FAD2(Mitochondrial Inner membrane)'                                 | 753.50 |
| 'MAPT(cytosol)'                                                      | 753.33 |
| 'caspase-3(cytosol)'                                                 | 752.00 |
| 'caspase-7(cytosol)'                                                 | 751.83 |
| 'H2O (Mitochondrial Inner membrane)'                                 | 751.33 |
| 'CREB dependent_br_transcription(Nucleus)'                           | 750.33 |
| 'PINK1(Mitochondrial Inner membrane)'                                | 749.50 |
| '26S hybrid proteasome(cytosol)'                                     | 749.17 |
| 'Autophagosome(cytosol)'                                             | 749.17 |
| 'misfolded SNCA(cytosol)'                                            | 747.33 |
| 'ROS(cytosol)'                                                       | 743.83 |
| 'SAP-97(cytosol)'                                                    | 743.33 |
| 'extracellular alpha cynuclein(default)'                             | 743.00 |
| 'Lysosome(Lysosome)'                                                 | 742.33 |
| 'TARP-PSD95-Mdm2(cytosol)'                                           | 742.17 |
| 'AMPA receptors containing GluR2 (homomers)(cytosol)'                | 742.17 |
| 'DNM1L(Mitochondrial outer membrane)'                                | 742.17 |
| 'Dopamine(cytosol)'                                                  | 742.00 |

|                                                                  |        |
|------------------------------------------------------------------|--------|
| 'Tyrosine 3-monooxygenase (Fe2+ cofactor)(cytosol)'              | 741.67 |
| 'Crotonoyl-CoA(Mitochondrial Inner membrane)'                    | 741.17 |
| '2-trans-Dodecenoyl-CoA(Mitochondrial Inner membrane)'           | 741.00 |
| 'trans-Tetradec-2-enoyl-CoA(Mitochondrial Inner membrane)'       | 740.83 |
| 'Misfolded protein propagation(default)'                         | 739.50 |
| 'SNAP25(cytosol)'                                                | 739.17 |
| 'BECN1(cytosol)'                                                 | 739.17 |
| 'CO2 (cytosol)'                                                  | 739.17 |
| 'Acetate(Mitochondrial Inner membrane)'                          | 738.83 |
| 's251(cytosol)'                                                  | 736.67 |
| 'tBID(Mitochondrial outer membrane)'                             | 736.00 |
| 's250(cytosol)'                                                  | 735.67 |
| 'misfolded transmembrane ER protein(cytosol)'                    | 735.67 |
| 'PINK1:PARK2(Mitochondrial outer membrane)'                      | 733.50 |
| 'E2- E3-substrate complex(cytosol)'                              | 731.67 |
| 'BAD(cytosol)'                                                   | 730.83 |
| '3-hydroxyoctadecanoyl-CoA(cytosol)'                             | 730.83 |
| 'Malonyl-CoA(cytosol)'                                           | 730.67 |
| 'Electron Leakage at Complex III(Mitochondrial Inner membrane)'  | 730.00 |
| 'BAD:BCL-2(Mitochondrial outer membrane)'                        | 728.83 |
| 'EPB41L1(cytosol)'                                               | 728.67 |
| 'Acetyl-CoA (cytosol)'                                           | 728.33 |
| 'TXN(cytosol)'                                                   | 727.83 |
| 'AKAP5(cytosol)'                                                 | 727.67 |
| 'trans-cis-Lauro-2-6-dienoyl-CoA (Mitochondrial Inner membrane)' | 726.83 |
| 'L-Palmitoylcarnitine(Mitochondrial Inner membrane)'             | 726.83 |
| 'FOXO1(cytosol)'                                                 | 722.00 |
| 'NH3 (cytosol)'                                                  | 719.50 |
| 'Citrate(Mitochondrial outer membrane)'                          | 719.50 |
| 'stearoyl-CoA(cytosol)'                                          | 718.83 |
| 'H2O2 (cytosol)'                                                 | 718.33 |
| 'Isocitrate(Mitochondrial Inner membrane)'                       | 718.17 |
| 'E2(cytosol)'                                                    | 718.00 |
| 'IL-1R(cytosol)'                                                 | 717.50 |



|                                                             |        |
|-------------------------------------------------------------|--------|
| 'L-methylmalonyl-CoA(Mitochondrial Inner membrane)'         | 716.67 |
| 'mTOR complex 1 (mTORC1)(cytosol)'                          | 715.67 |
| 'MAPK1(cytosol)'                                            | 715.00 |
| 'SNCA (oligomer)(cytosol)'                                  | 712.33 |
| '5-Hydroxyindole acetic acid(Mitochondrial Inner membrane)' | 710.17 |
| 'Apaf-1:Cytochrome C(cytosol)'                              | 709.00 |
| 'IL1B(default)'                                             | 708.83 |
| 'UBA1(cytosol)'                                             | 708.67 |
| 'GSSG(cytosol)'                                             | 708.33 |
| 'NDUFS3(cytosol)'                                           | 707.17 |
| 'HMGB1/HMGB2- bound chromatin(Nucleus)'                     | 706.67 |
| 'Caspase-2(cytosol)'                                        | 706.67 |
| 'Ca2+(Mitochondrial Inner membrane)'                        | 706.67 |
| 'TJP1 (fragment)(cytosol)'                                  | 706.67 |
| 'DSP (fragment)(cytosol)'                                   | 706.67 |
| 'TJP2 (fragment)(cytosol)'                                  | 706.67 |
| 'PKP1 (fragmented)(cytosol)'                                | 706.67 |
| 'HTRA2(Mitochondrial outer membrane)'                       | 706.67 |
| 'PINK1(Mitochondrial outer membrane)'                       | 706.67 |
| 'PGE2(cytosol)'                                             | 706.17 |
| 'Palmitate(cytosol)'                                        | 705.50 |
| 'MAPK14(cytosol)'                                           | 704.83 |
| 'BAK1(Mitochondrial outer membrane)'                        | 704.00 |
| 'PPARGC1A(Nucleus)'                                         | 702.67 |
| 'PINK1(Mitochondrial outer membrane)'                       | 701.33 |
| 'D-Glucose 1-phosphate(cytosol)'                            | 700.00 |
| 'Complex_br_(ubiquitin/E1)(cytosol)'                        | 699.83 |
| 'DNM1L(cytosol)'                                            | 699.00 |
| 'Acetaldehyde(Mitochondrial Inner membrane)'                | 698.67 |
| 'DFFB(Nucleus)'                                             | 694.33 |
| 'TNFR(cytosol)'                                             | 694.33 |
| 'DOPAC(cytosol)'                                            | 692.50 |
| 'DNM1L(Mitochondrial outer membrane)'                       | 691.83 |
| 'TSC2(cytosol)'                                             | 691.00 |

|                                                                 |        |
|-----------------------------------------------------------------|--------|
| 'DHAP(Mitochondrial Inner membrane)'                            | 690.33 |
| 'DIABLO(cytosol)'                                               | 689.33 |
| 'CRTC1(Nucleus)'                                                | 689.00 |
| 'IKK complex(cytosol)'                                          | 688.33 |
| 'alpha cynuclein(microglia)'                                    | 688.17 |
| 'NMDA receptor complex(cytosol)'                                | 687.83 |
| 'tBID(cytosol)'                                                 | 687.67 |
| 's253(cytosol)'                                                 | 687.33 |
| '(S)-Malate(Mitochondrial outer membrane)'                      | 687.17 |
| 'Jacob:importin alpha(cytosol)'                                 | 687.17 |
| 'Jacob:caldendrin(cytosol)'                                     | 687.17 |
| 'LRRK2(cytosol)'                                                | 687.17 |
| 's252(cytosol)'                                                 | 686.67 |
| 'OH•(Mitochondrial Inner membrane)'                             | 686.50 |
| 'PGH2(cytosol)'                                                 | 686.33 |
| 'VDAC1:HDAC6:p62(cytosol)'                                      | 686.00 |
| 'BAX(Mitochondrial outer membrane)'                             | 685.83 |
| 'K+(Mitochondrial Inner membrane)'                              | 684.00 |
| '3-oxo-(7-10-13-16)-docosatetraenoyl-CoA(cytosol)'              | 683.33 |
| 's183(cytosol)'                                                 | 682.00 |
| 'L-Palmitoylcarnitine(Mitochondrial outer membrane)'            | 681.83 |
| 'MAP2K7(cytosol)'                                               | 679.17 |
| 'DOPAL(cytosol)'                                                | 678.83 |
| 'H2O2(cytosol)'                                                 | 677.17 |
| 'MAP2K4(cytosol)'                                               | 677.00 |
| 'HOO•(Mitochondrial Inner membrane)'                            | 677.00 |
| 'SMAC:XIAP(cytosol)'                                            | 674.67 |
| 'BCL6(Nucleus)'                                                 | 672.67 |
| 'PPARGC1A(Nucleus)'                                             | 672.50 |
| 'Bcl2:BH3-only protein complex(Mitochondrial outer membrane)'   | 671.67 |
| 'ROS(default)'                                                  | 671.00 |
| 'ACADL(Mitochondrial Inner membrane)'                           | 671.00 |
| 'O2-(Mitochondrial outer membrane)'                             | 671.00 |
| 'NADH-Q oxireductase (complex I)(Mitochondrial Inner membrane)' | 669.50 |

|                                                                |        |
|----------------------------------------------------------------|--------|
| 'isocitrate dehydrogenase(Mitochondrial Inner membrane)'       | 669.50 |
| 'DSG2 (70 Kd fragment)(cytosol)'                               | 669.50 |
| 'SOD2(Mitochondrial Inner membrane)'                           | 669.50 |
| 'HMGCS2(Mitochondrial Inner membrane)'                         | 669.50 |
| 'GLUD1(Mitochondrial Inner membrane)'                          | 669.50 |
| 's4881(cytosol)'                                               | 668.67 |
| 'O2(cytosol)'                                                  | 668.50 |
| 'VCP:UBE4B(cytosol)'                                           | 667.50 |
| 'Glycine(cytosol)'                                             | 667.00 |
| 'ataxin 3:VCP(cytosol)'                                        | 666.33 |
| 'ubiquitin-binding adaptor:VCP(cytosol)'                       | 666.33 |
| 'clathrin:VCP(cytosol)'                                        | 666.33 |
| 'ubiquitin-interacting vesicle protein:VCP(cytosol)'           | 666.33 |
| 'UBE4A:VCP(cytosol)'                                           | 666.33 |
| 'BAX(cytosol)'                                                 | 666.00 |
| 'L-Glutamate(cytosol)'                                         | 665.83 |
| 'E2(cytosol)'                                                  | 665.50 |
| 'GLUD1(Mitochondrial Inner membrane)'                          | 665.00 |
| 'HTRA2(cytosol)'                                               | 663.33 |
| 'MSN(cytosol)'                                                 | 663.33 |
| 'EZR(cytosol)'                                                 | 663.33 |
| 'RDX(cytosol)'                                                 | 663.33 |
| 'TAOK3(cytosol)'                                               | 663.33 |
| 'STK3(cytosol)'                                                | 663.33 |
| 'STK24(cytosol)'                                               | 663.33 |
| 'STK25(cytosol)'                                               | 663.33 |
| 'EIF4EBP1(cytosol)'                                            | 663.33 |
| 'tublin beta(cytosol)'                                         | 663.33 |
| 'membrane permeability(Mitochondrial Inner membrane)'          | 662.33 |
| '5-hydroxytryptamine N-methyl conjugate(cytosol)'              | 661.67 |
| 'NO(default)'                                                  | 661.50 |
| 'PARK2:UbcH7(cytosol)'                                         | 661.50 |
| 'CREB:TORC1(Nucleus)'                                          | 661.33 |
| 'NF- $\kappa$ <sub>B</sub> :I $\kappa$ <sub>B</sub> (cytosol)' | 661.33 |

|                                            |        |
|--------------------------------------------|--------|
| 'anchored proteasome(cytosol)'             | 660.83 |
| 'TNF(default)'                             | 660.00 |
| 'ZNF746(cytosol)'                          | 659.00 |
| 'SNCAIP(cytosol)'                          | 659.00 |
| '?-tublin(cytosol)'                        | 659.00 |
| 'Sep-05(cytosol)'                          | 659.00 |
| 'GPR37(cytosol)'                           | 659.00 |
| '?-tubulin(cytosol)'                       | 659.00 |
| 'cyclin-E(cytosol)'                        | 659.00 |
| 'RANBP2(cytosol)'                          | 659.00 |
| 'AIMP2(cytosol)'                           | 659.00 |
| 'SIM2(cytosol)'                            | 659.00 |
| 'SLC6A3(cytosol)'                          | 659.00 |
| 'SYT11(cytosol)'                           | 659.00 |
| 'FUBP1(cytosol)'                           | 659.00 |
| 'ATG1 kinase complex(cytosol)'             | 657.67 |
| 'PGG2(cytosol)'                            | 656.67 |
| 'RPS6KA3(cytosol)'                         | 655.33 |
| 'RPS6KA1(cytosol)'                         | 653.67 |
| 'RPS6KA2(cytosol)'                         | 653.67 |
| 'RPS6KA6(cytosol)'                         | 653.67 |
| 'CLSPN (fragment 1073-1332)(Nucleus)'      | 653.17 |
| 'OCLN (fragment 321-522)(cytosol)'         | 653.17 |
| 'OCLN (fragment 1-320)(cytosol)'           | 653.17 |
| 'PAK2(cytosol)'                            | 653.17 |
| 'CLSPN (fragment 1-1072)(Nucleus)'         | 653.17 |
| 'ADP(cytosol)'                             | 653.17 |
| 'PGD2(cytosol)'                            | 653.00 |
| 'NF-kB:IkB(cytosol)'                       | 652.67 |
| 'GSH(cytosol)'                             | 652.33 |
| 'BBC3(Mitochondrial Inner membrane)'       | 652.00 |
| 'HTRA2(cytosol)'                           | 652.00 |
| 'DFF40 associated with chromatin(Nucleus)' | 651.33 |
| 'PMAIP1(Mitochondrial Inner membrane)'     | 650.83 |

|                                                |        |
|------------------------------------------------|--------|
| 'Na+ (cytosol)'                                | 648.67 |
| 'SLC25A14(Nucleus)'                            | 648.50 |
| 'membrane depolarization(cytosol)'             | 648.33 |
| 'Apoptosome (cytosol)'                         | 647.33 |
| 'SLC25A27(Nucleus)'                            | 647.00 |
| 'CREB:TORC2(Nucleus)'                          | 644.83 |
| 'Phosphoenolpyruvate(cytosol)'                 | 644.17 |
| 'PLEC (fragment 2396-4684)(cytosol)'           | 643.83 |
| 'PLEC (fragment 1-2395)(cytosol)'              | 643.33 |
| 'VIM (fragment 2-429)(cytosol)'                | 643.33 |
| 'misfolded protein(cytosol)'                   | 643.17 |
| 'K63-polyubiquitinated midfoded DJ-1(cytosol)' | 642.83 |
| 'Fe(II)(Mitochondrial Inner membrane)'         | 642.00 |
| 'SATB1 (fragment 1-254)(Nucleus)'              | 641.67 |
| 'LMNA (fragment 1-230)(Nucleus)'               | 641.67 |
| 'LMNB1 (fragment 1-231)(Nucleus)'              | 641.67 |
| 'DSG3 (fragment 50-781)(cytosol)'              | 641.67 |
| 'LMNA (fragment 231-664)(Nucleus)'             | 641.67 |
| 'LMNB1 fragment (232-586)(Nucleus)'            | 641.67 |
| 'SATB1 (fragment 255-763)(Nucleus)'            | 641.67 |
| 'VIM (fragment 430-466)(cytosol)'              | 641.67 |
| 'Microgria activation(microglia)'              | 641.00 |
| 'phagocytosis(microglia)'                      | 640.67 |
| 'NSF:NAPA(cytosol)'                            | 640.00 |
| 'CDH1 (fragment 751-882) (cytosol)'            | 639.33 |
| 'CDH1 (fragment 155-750)(cytosol)'             | 639.33 |
| 'DSG1 (fragment 50-888)(cytosol)'              | 639.33 |
| 'DSG3 (fragment 782-999)(cytosol)'             | 639.33 |
| 'DSG1 (fragment 889-1049)(cytosol)'            | 639.33 |
| 'Jacob:importin alpha(Nucleus)'                | 639.33 |
| 'MAPK13(cytosol)'                              | 639.33 |
| 'DNM1L(cytosol)'                               | 638.67 |
| 'MAPK12(cytosol)'                              | 638.67 |
| 'MAPK11(cytosol)'                              | 638.00 |

|                                                    |        |
|----------------------------------------------------|--------|
| 'ROS(microglia)'                                   | 637.67 |
| 'GSK3B(cytosol)'                                   | 637.33 |
| 'HSPA8(cytosol)'                                   | 636.67 |
| 'SNCA (Ala53Thr)(cytosol)'                         | 636.00 |
| 'CREB:CBP(Nucleus)'                                | 635.67 |
| 'SNCA (Ala30Pro)(cytosol)'                         | 635.33 |
| 'HPGDS(cytosol)'                                   | 634.67 |
| 'PTGDS(cytosol)'                                   | 634.00 |
| 'PTGES3(cytosol)'                                  | 633.33 |
| 'Arachidonic acid(cytosol)'                        | 633.33 |
| 'ACC2(cytosol)'                                    | 633.00 |
| 'PTGES(cytosol)'                                   | 632.67 |
| 'PTGES2(cytosol)'                                  | 632.00 |
| 'SNCA (fibril)(cytosol)'                           | 631.33 |
| 'PTGS1(cytosol)'                                   | 631.33 |
| 'Arachidonic Acid(cytosol)'                        | 630.67 |
| 'inclusion bodies(cytosol)'                        | 630.33 |
| 'PTGS2(Nucleus)'                                   | 630.00 |
| 'NO(cytosol)'                                      | 629.33 |
| 'Rab3:RIM(cytosol)'                                | 629.17 |
| 'SNCA(Docked DA loaded synaptic vesicle)'          | 628.67 |
| 'LC3:VDAC1:HDAC6:p62(cytosol)'                     | 628.33 |
| 'HV Aldehyde(cytosol)'                             | 628.00 |
| 'VAMP2(DA loaded synaptic vesicle)'                | 628.00 |
| 'PARK2:HSP70(cytosol)'                             | 627.50 |
| 'CSP:Hsc70:SGT(Docked DA loaded synaptic vesicle)' | 627.33 |
| 'EIF4EBP1(cytosol)'                                | 626.67 |
| 'BCAP31 (fragment 165-237)(ER)'                    | 626.33 |
| 'PRKCZ(cytosol)'                                   | 626.00 |
| 'BCAP31 (fragment 2-164)(ER)'                      | 625.50 |
| 'BCAP31 (fragment 238-246)(ER)'                    | 625.50 |
| 'activated LRRK2(cytosol)'                         | 625.33 |
| 'SIRT3(Nucleus)'                                   | 625.00 |
| 'GAS2 (fragment 1-279)(cytosol)'                   | 624.83 |

|                                             |        |
|---------------------------------------------|--------|
| 'STK25(cytosol)'                            | 624.67 |
| 'Autophagy induction(cytosol)'              | 624.00 |
| 'STK24(cytosol)'                            | 624.00 |
| 'GAS2 (fragment 280-313)(cytosol)'          | 623.33 |
| 'STK3(cytosol)'                             | 623.33 |
| 'L-Glutamate(Mitochondrial Inner membrane)' | 623.00 |
| 'NF-kB(cytosol)'                            | 622.67 |
| 'TAOK3(cytosol)'                            | 622.67 |
| 'BCL2:VDAC1(Mitochondrial outer membrane)'  | 622.50 |
| 'tublin beta(cytosol)'                      | 622.00 |
| 'OH-(cytosol)'                              | 621.67 |
| 'RDX(cytosol)'                              | 621.33 |
| 'SNCA(cytosol)'                             | 620.83 |
| 'EZR(cytosol)'                              | 620.67 |
| 'VIM (fragment 260-466)(cytosol)'           | 620.50 |
| 'VIM (fragment 2-259)(cytosol)'             | 620.00 |
| 'MAPK10(cytosol)'                           | 620.00 |
| 'MSN(cytosol)'                              | 620.00 |
| 'Fe(III)(cytosol)'                          | 619.83 |
| 'Autolysosome(Autolysosome)'                | 619.33 |
| 'MPTP(cytosol)'                             | 619.33 |
| 'NF-kB(cytosol)'                            | 618.67 |
| 'MAPK8(cytosol)'                            | 618.67 |
| 'MAPK9(cytosol)'                            | 618.67 |
| 'TARP:DLG4:MDM2(cytosol)'                   | 618.67 |
| 'GPAT2(Mitochondrial outer membrane)'       | 618.00 |
| 'GPAM(Mitochondrial outer membrane)'        | 617.33 |
| 'PARK2(cytosol)'                            | 617.17 |
| 'GK(cytosol)'                               | 616.67 |
| 'PTGS2(Nucleus)'                            | 616.50 |
| 'tBID:BAK(Mitochondrial outer membrane)'    | 616.00 |
| 'GDP1(cytosol)'                             | 616.00 |
| 'Glycerol(cytosol)'                         | 615.33 |
| 's2193(cytosol)'                            | 614.83 |

|                                            |        |
|--------------------------------------------|--------|
| 'DHAP(cytosol)'                            | 614.67 |
| 'DOPET(cytosol)'                           | 614.33 |
| 'Citrate lyase(cytosol)'                   | 614.00 |
| 'Mg2+(default)'                            | 613.33 |
| 'Citrate(cytosol)'                         | 613.33 |
| 'LPIN3(c26)'                               | 612.67 |
| 'NMDA receptor complex(cytosol)'           | 612.17 |
| 'Na+(cytosol)'                             | 612.00 |
| 'LPIN2(c26)'                               | 612.00 |
| 'Ku70:BAX complex(cytosol)'                | 611.67 |
| 'LPIN1(c26)'                               | 611.33 |
| 'AGPAT5(c26)'                              | 610.67 |
| 'CREB1(Nucleus)'                           | 610.33 |
| 'AGPAT4(c26)'                              | 610.00 |
| 'AGPAT3(c26)'                              | 609.33 |
| 'AGPAT2(c26)'                              | 608.67 |
| '3-oxocerotoyl-CoA(cytosol)'               | 608.33 |
| 'AGPAT1(c26)'                              | 608.00 |
| 'RIMS1(cytosol)'                           | 607.67 |
| '3-oxobehenoyl-CoA(cytosol)'               | 607.33 |
| 'AGPAT9(c26)'                              | 607.33 |
| 'tBID:BCL-2(Mitochondrial outer membrane)' | 607.17 |
| 's1695(cytosol)'                           | 607.17 |
| 'type 3 spinocerebellar ataxia(cytosol)'   | 607.17 |
| 'DNM1L(Mitochondrial outer membrane)'      | 607.17 |
| 'IL6(default)'                             | 607.17 |
| 'FASL(default)'                            | 607.17 |
| 'AGPAT6(c26)'                              | 606.67 |
| 'TECR(c26)'                                | 606.00 |
| '3-hydroxyacyl-CoA dehydratase(c26)'       | 605.33 |
| 'HSD17B12(c26)'                            | 604.67 |
| 'trans-octadec-2-enoyl-CoA(cytosol)'       | 604.67 |
| 'ATG1 kinase complex(cytosol)'             | 604.17 |
| 'ELOVL6(c26)'                              | 604.00 |



|                                         |        |
|-----------------------------------------|--------|
| 'ELOVL3(c26)'                           | 603.33 |
| 'ELOVL2(c26)'                           | 602.67 |
| 'ELOVL1(c26)'                           | 602.00 |
| 'VIM (fragment 2-85)(cytosol)'          | 601.83 |
| 'beta-D-Glucose(cytosol)'               | 601.83 |
| 'VIM (fragment 86-466)(cytosol)'        | 601.33 |
| 'ACSL6(c26)'                            | 601.33 |
| 'ACSL5(c26)'                            | 600.67 |
| 'ACSL3(c26)'                            | 600.00 |
| 'proteasome:VCP(cytosol)'               | 599.83 |
| 'ACSL1(c26)'                            | 599.33 |
| 'FASN(cytosol)'                         | 598.67 |
| 'S-adenosylhomocysteine (cytosol)'      | 598.00 |
| 'ACC2(cytosol)'                         | 598.00 |
| 'ACC1(cytosol)'                         | 597.33 |
| '1-chloro-2-4-dinitrobenzene (cytosol)' | 597.00 |
| 'ELOVL4(c26)'                           | 596.67 |
| 's2319(cytosol)'                        | 596.33 |
| 'PAK2 (p34)(cytosol)'                   | 596.33 |
| 'tetracosanoyl-CoA(cytosol)'            | 596.00 |
| 'SLC25A14(cytosol)'                     | 595.33 |
| 'ELOVL7(c26)'                           | 595.33 |
| 'arachidoyl-CoA(cytosol)'               | 594.67 |
| 'SLC25A27(cytosol)'                     | 594.33 |
| 'ELOVL5(c26)'                           | 594.00 |
| 'ACSL4(c26)'                            | 593.33 |
| 'Arachidonate(cytosol)'                 | 592.67 |
| 'DGAT2(c26)'                            | 592.00 |
| 'Ras:GTP(cytosol)'                      | 591.67 |
| 'DGAT1(c26)'                            | 591.33 |
| 'importin-?(Nucleus)'                   | 591.17 |
| 'HCO3-(cytosol)'                        | 590.67 |
| 'fatty acyl CoA(cytosol)'               | 590.00 |
| 'LAMP2(Lysosome)'                       | 589.33 |

|                                                                                |        |
|--------------------------------------------------------------------------------|--------|
| 'CAMKK2(cytosol)'                                                              | 588.67 |
| 'K+(Mitochondrial outer membrane)'                                             | 588.00 |
| 'PPP2CB(cytosol)'                                                              | 587.33 |
| 'AKR1B1(cytosol)'                                                              | 586.67 |
| 'ALDH9A1(cytosol)'                                                             | 586.00 |
| 'XRCC6(cytosol)'                                                               | 585.50 |
| 'ALDH1A1(cytosol)'                                                             | 585.33 |
| 'UPS(cytosol)'                                                                 | 584.67 |
| 'Bcl-2:BH-3 only proteins(cytosol)'                                            | 584.00 |
| 'E3(cytosol)'                                                                  | 583.67 |
| 'ubiquinol_cytochrome-c reductase (complex III)(Mitochondrial Inner membrane)' | 583.33 |
| 'ATF3(Nucleus)'                                                                | 583.00 |
| 'Calmodulin(cytosol)'                                                          | 582.67 |
| 'HSP40:HSP70(cytosol)'                                                         | 582.67 |
| '14-3-3 sigma:Bax(cytosol)'                                                    | 582.00 |
| '14-3-3 zeta:Bax(cytosol)'                                                     | 581.33 |
| 'ASK1 signalsome(cytosol)'                                                     | 581.00 |
| 'CASP9(cytosol)'                                                               | 580.67 |
| 'MAOA:FAD(Mitochondrial outer membrane)'                                       | 580.67 |
| 'Serpinb 2(Nucleus)'                                                           | 580.00 |
| 'Nr4a1(Nucleus)'                                                               | 580.00 |
| 'Npas4(Nucleus)'                                                               | 580.00 |
| 'INHBA(Nucleus)'                                                               | 580.00 |
| 'GADD45G(Nucleus)'                                                             | 580.00 |
| 'GADD45B(Nucleus)'                                                             | 580.00 |
| 'BTG2(Nucleus)'                                                                | 580.00 |
| 'MAOB:FAD(Mitochondrial outer membrane)'                                       | 580.00 |
| 'Autolysosome(cytosol)'                                                        | 579.33 |
| 'unidentified caspase acting on Occludin(cytosol)'                             | 579.33 |
| 'CREBBP(Nucleus)'                                                              | 578.67 |
| 'unidentified caspase acting on Plakophilin 1(cytosol)'                        | 578.67 |
| 'tetrodotoxin(cytosol)'                                                        | 578.33 |
| 'bicuculline(cytosol)'                                                         | 578.33 |
| 'IBMPFD(cytosol)'                                                              | 578.33 |

|                                                                 |        |
|-----------------------------------------------------------------|--------|
| 'inclusions of ubiquitilated TDP-43(cytosol)'                   | 578.33 |
| 'ERAD defect(cytosol)'                                          | 578.33 |
| 'ubiquitin positive aggregates(cytosol)'                        | 578.33 |
| 'Lysosome biogenesis(cytosol)'                                  | 578.33 |
| 'unidentified caspase acting on ZO-1(cytosol)'                  | 578.00 |
| 'unidentified caspase acting on Desmoplakin(cytosol)'           | 577.33 |
| 'Name unidentified caspase acting on ZO-2 (cytosol)'            | 576.67 |
| 'tBID:BAX(cytosol)'                                             | 576.67 |
| 'NADPH(cytosol)'                                                | 576.00 |
| 'propionyl-CoA(Mitochondrial Inner membrane)'                   | 575.33 |
| 'G3P(Mitochondrial Inner membrane)'                             | 574.67 |
| '(S)-Malate(Mitochondrial Inner membrane)'                      | 574.00 |
| 'PPP2CA(cytosol)'                                               | 574.00 |
| 'SMAC:XIAP:Caspase-9(cytosol)'                                  | 573.33 |
| 'AMPA receptor ligand complex(cytosol)'                         | 573.33 |
| 'linoleoyl-CoA(Mitochondrial Inner membrane)'                   | 573.33 |
| 'Caspase-8(ER)'                                                 | 572.67 |
| 'cAMP(cytosol)'                                                 | 572.67 |
| 'SMAC:XIAP:Caspase-7(cytosol)'                                  | 572.33 |
| 'MFN2(cytosol)'                                                 | 572.00 |
| 'Glycine(default)'                                              | 572.00 |
| 'SMAC:XIAP:Caspase-3(cytosol)'                                  | 571.83 |
| 'Electron Leakage at Complex III(Mitochondrial outer membrane)' | 571.83 |
| 'L-Glutamate(default)'                                          | 571.33 |
| 'MFN1(cytosol)'                                                 | 571.00 |
| 'ATP(cytosol)'                                                  | 570.33 |
| 'caspase-3-cleaved DFF45 (117-224):DFF40 complex(Nucleus)'      | 570.00 |
| 'GDP(Mitochondrial Inner membrane)'                             | 569.67 |
| 'SLC25A27(Mitochondrial Inner membrane)'                        | 569.33 |
| 'Oxidative stress(Mitochondrial Inner membrane)'                | 569.17 |
| 'ATP (Mitochondrial Inner membrane)'                            | 569.00 |
| 'PARK7(Mitochondrial Inner membrane)'                           | 568.83 |
| 'Thiol reductants(Mitochondrial outer membrane)'                | 568.33 |
| 'UBL-acyl adenylate intermediate(cytosol)'                      | 568.00 |

|                                                              |        |
|--------------------------------------------------------------|--------|
| 'SLC25A14(Mitochondrial Inner membrane)'                     | 568.00 |
| 'ATP(Mitochondrial outer membrane)'                          | 567.67 |
| 'PAK2 (fragment 1-212)(cytosol)'                             | 567.00 |
| 'O2(Mitochondrial outer membrane)'                           | 567.00 |
| 'oxygen(Mitochondrial Inner membrane)'                       | 566.33 |
| 'H2O (cytosol)'                                              | 565.67 |
| 'CSP:Hsc70:SGT(cytosol)'                                     | 565.17 |
| 'Free Faty Acid(Mitochondrial outer membrane)'               | 565.00 |
| 'Purine Nucleotide(Mitochondrial outer membrane)'            | 564.33 |
| '5-hydroxyindole acetaldehyde(Mitochondrial Inner membrane)' | 563.67 |
| 'Calmodulin:CaMK IV(cytosol)'                                | 563.33 |
| 'CRTC2(cytosol)'                                             | 563.33 |
| 'Dopamine(default)'                                          | 563.17 |
| 'S-adenosylmethionine (cytosol)'                             | 563.00 |
| 'SLC18A2(cytosol)'                                           | 562.83 |
| 'Tetrahydrobiopterin (cytosol)'                              | 562.33 |
| 'SNARE complex(cytosol)'                                     | 562.17 |
| 'SYT1(cytosol)'                                              | 562.17 |
| 'Oxygen (cytosol)'                                           | 561.67 |
| 'Synapsin(cytosol)'                                          | 561.17 |
| 'CPLX1(cytosol)'                                             | 561.17 |
| 'L-Tyrosine (cytosol)'                                       | 561.00 |
| 'XIAP(cytosol)'                                              | 560.33 |
| 'PARL(Mitochondrial outer membrane)'                         | 559.67 |
| 'HTRA2(Mitochondrial outer membrane)'                        | 559.00 |
| 'PAK2 (p34)(cytosol)'                                        | 558.50 |
| 'iNOS(astrocyte)'                                            | 558.33 |
| 'Pentose phosphate pathway(cytosol)'                         | 557.83 |
| 'FASL(astrocyte)'                                            | 557.67 |
| 'IL6(microglia)'                                             | 557.00 |
| 'NADPH oxidase(astrocyte)'                                   | 556.33 |
| 'MAPT (fragment 2-421)(cytosol)'                             | 556.17 |
| 'NADPH oxidase(microglia)'                                   | 555.67 |
| 'IL1B(microglia)'                                            | 555.00 |

|                                       |        |
|---------------------------------------|--------|
| 'MAPT (fragment 422-758)(cytosol)'    | 554.33 |
| 'IL1B(astrocyte)'                     | 554.33 |
| 'TNF(astrocyte)'                      | 553.67 |
| 'PKAc(cytosol)'                       | 553.00 |
| 'NFKB1(cytosol)'                      | 552.33 |
| 'VDAC1(Mitochondrial outer membrane)' | 551.83 |
| 'RELA(cytosol)'                       | 551.67 |
| 's4898(cytosol)'                      | 551.17 |
| 'NFKBIA(cytosol)'                     | 551.00 |
| 'BTRC(cytosol)'                       | 550.33 |
| 'PTGS2(cytosol)'                      | 550.17 |
| 'ACADL(Mitochondrial Inner membrane)' | 549.67 |
| 'PRDX4(Mitochondrial Inner membrane)' | 549.00 |
| 'SOD1(cytosol)'                       | 548.33 |
| 'RPS6KA1(Nucleus)'                    | 548.17 |
| 'RPS6KA3(Nucleus)'                    | 547.83 |
| 'PRDX4(cytosol)'                      | 547.67 |
| 'RPS6KA6(Nucleus)'                    | 547.33 |
| 'TXNRD1(cytosol)'                     | 547.00 |
| 'RPS6KA2(Nucleus)'                    | 546.67 |
| 'CAT(cytosol)'                        | 546.33 |
| 'PAK2 (p34)(Nucleus)'                 | 545.67 |
| 'GPX1(cytosol)'                       | 545.67 |
| 'DBNL (fragment 1-361)(cytosol)'      | 545.33 |
| 'VDAC1(Mitochondrial outer membrane)' | 545.33 |
| 'GSR(cytosol)'                        | 545.00 |
| 'GPX4(cytosol)'                       | 544.33 |
| 'TXNRD2(cytosol)'                     | 543.67 |
| 'BCL6(cytosol)'                       | 543.00 |
| 'PRDX1(cytosol)'                      | 543.00 |
| 'PRDX2(cytosol)'                      | 542.33 |
| 'PRDX3(cytosol)'                      | 541.67 |
| 'PRDX5(cytosol)'                      | 541.00 |
| 's49(cytosol)'                        | 540.33 |

|                                                     |        |
|-----------------------------------------------------|--------|
| 'HSP70(cytosol)'                                    | 540.33 |
| 'Intrinsic apoptosis(Mitochondrial Inner membrane)' | 540.17 |
| 'ROS(astrocyte)'                                    | 540.17 |
| 'ACADVL(Mitochondrial Inner membrane)'              | 539.67 |
| 'GRIN2B(cytosol)'                                   | 539.33 |
| 'CPT2(Mitochondrial Inner membrane)'                | 539.00 |
| 'SLC25A20(Mitochondrial Inner membrane)'            | 538.33 |
| 'CPT1A(Mitochondrial Inner membrane)'               | 537.67 |
| 'CPT1B(Mitochondrial Inner membrane)'               | 537.00 |
| 'Lewy Body(Lewy Body)'                              | 536.83 |
| 'protein phosphatase 1(cytosol)'                    | 536.33 |
| 'MCEE(Mitochondrial Inner membrane)'                | 536.33 |
| 'CAMK2A(cytosol)'                                   | 536.33 |
| 'GRIN2A(cytosol)'                                   | 536.33 |
| 'GPD2(Mitochondrial Inner membrane)'                | 535.67 |
| 'APC fragment(778-2483)(cytosol)'                   | 535.50 |
| 'APC fragment(1-777)(cytosol)'                      | 535.50 |
| 'ROCK1 (fragment 1-1113)(cytosol)'                  | 535.50 |
| 'PRKCQ (fragment 355-706)(cytosol)'                 | 535.50 |
| 'BIRC2 (fragment 1-372)(cytosol)'                   | 535.50 |
| 'BIRC2 (fragment 373-618)(cytosol)'                 | 535.50 |
| 'ROCK1 (fragment 1114-1354)(cytosol)'               | 535.50 |
| 'FNTA (fragment 1-59)(cytosol)'                     | 535.50 |
| 'FNTA (fragment 60-379)(cytosol)'                   | 535.50 |
| 'PRKCQ (fragment 1-354)(cytosol)'                   | 535.50 |
| 'PRKCD (fragment 330-676)(cytosol)'                 | 535.50 |
| 'PRKCD (fragment 1-329)(cytosol)'                   | 535.50 |
| 'ADD1 (fragment 634-737)(cytosol)'                  | 535.50 |
| 'ADD1 (fragment 1-633)(cytosol)'                    | 535.50 |
| 'ACIN1 (fragment 1-1093)(cytosol)'                  | 535.50 |
| 'ACIN1 (fragment 1094-1341)(cytosol)'               | 535.50 |
| 'SPTAN1 (fragment 1-1185)(cytosol)'                 | 535.50 |
| 'SPTAN1 (fragment 1186-2472)(cytosol)'              | 535.50 |
| 'MST4 (fragment 306-416)(cytosol)'                  | 535.50 |

|                                         |        |
|-----------------------------------------|--------|
| 'MST4 (fragment 1-305)(cytosol)'        | 535.50 |
| 'BMX (fragment 243-675)(cytosol)'       | 535.50 |
| 'BMX (fragment 1-242)(cytosol)'         | 535.50 |
| 'CTNNB1 (fragment 116-376)(cytosol)'    | 535.50 |
| 'CTNNB1 (fragment 1-115)(cytosol)'      | 535.50 |
| 'GSN (fragment 404-782)(cytosol)'       | 535.50 |
| 'GSN (fragment 27-403)(cytosol)'        | 535.50 |
| 'DBNL (fragment 362-431)(cytosol)'      | 535.50 |
| 'SLC25A1(Mitochondrial Inner membrane)' | 535.00 |
| 'DCI(Mitochondrial Inner membrane)'     | 534.33 |
| 'PGE2(default)'                         | 533.83 |
| 'ACADM(Mitochondrial Inner membrane)'   | 533.67 |
| 'HADH(Mitochondrial Inner membrane)'    | 533.00 |
| 'ACADS(Mitochondrial Inner membrane)'   | 532.33 |
| 'Raf/Mek(cytosol)'                      | 532.00 |
| 'ECHS1(Mitochondrial Inner membrane)'   | 531.67 |
| 'DECR1(Mitochondrial Inner membrane)'   | 531.00 |
| 'PMPCA(Mitochondrial Inner membrane)'   | 530.33 |
| 'DFF cleaved DNA(Nucleus)'              | 529.67 |
| 'PINK1(cytosol)'                        | 529.67 |
| 'PARL(Mitochondrial Inner membrane)'    | 529.00 |
| 'SLC6A3(cytosol)'                       | 528.33 |
| 'FUBP1(cytosol)'                        | 527.67 |
| 's4933(cytosol)'                        | 527.67 |
| 'ATF3(cytosol)'                         | 527.33 |
| 'VAMP2(cytosol)'                        | 527.17 |
| 'MUL1(Mitochondrial outer membrane)'    | 527.00 |
| 'STX1A(cytosol)'                        | 526.83 |
| 'Calcinuerin(cytosol)'                  | 526.33 |
| 'Calmodulin:CaMK IV(Nucleus)'           | 525.67 |
| 'MFN2(Mitochondrial outer membrane)'    | 525.67 |
| 'ubiquitin-VCP complex(cytosol)'        | 525.17 |
| 'MFN1(Mitochondrial outer membrane)'    | 525.00 |
| 'SNAP25 (misfolded)(cytosol)'           | 524.50 |

|                                                  |        |
|--------------------------------------------------|--------|
| 'Fe(II)(cytosol)'                                | 524.33 |
| 'INHBA(cytosol)'                                 | 524.33 |
| 'SERPINB2(cytosol)'                              | 524.33 |
| 'NPAS4(cytosol)'                                 | 524.33 |
| 'NR4A1(cytosol)'                                 | 524.33 |
| 'GADD45G(cytosol)'                               | 524.33 |
| 'GADD45B(cytosol)'                               | 524.33 |
| 'BTG2(cytosol)'                                  | 524.33 |
| 'GPR37(cytosol)'                                 | 524.33 |
| 'RANBP2(cytosol)'                                | 523.67 |
| 'SLC6A3(cytosol)'                                | 523.00 |
| 'SIM2(cytosol)'                                  | 522.33 |
| 'AIMP2(cytosol)'                                 | 521.67 |
| 'OH•(cytosol)'                                   | 521.67 |
| 'cyclin-E(cytosol)'                              | 521.00 |
| '?-tubulin(cytosol)'                             | 520.33 |
| '?-tublin(cytosol)'                              | 519.67 |
| 'Sep-05(cytosol)'                                | 519.00 |
| 'PARK7(cytosol)'                                 | 518.33 |
| 'SNCAIP(cytosol)'                                | 517.67 |
| 'UbcH7(cytosol)'                                 | 517.00 |
| 'CaMKII:Calmodulin:Ca2(cytosol)'                 | 516.67 |
| 'AKAP150(cytosol)'                               | 516.33 |
| 'BAK1(Mitochondrial outer membrane)'             | 515.83 |
| 'GRIP1(cytosol)'                                 | 515.67 |
| 'actin(cytosol)'                                 | 515.00 |
| 'UQCRC1(Nucleus)'                                | 514.67 |
| 'BAG1(cytosol)'                                  | 514.33 |
| 'DNAJB2(cytosol)'                                | 513.67 |
| 'Protein target(cytosol)'                        | 513.50 |
| 'STUB1(cytosol)'                                 | 513.00 |
| 'HOO•(cytosol)'                                  | 512.67 |
| 'ubiquitin-interactin vesicle proteins(cytosol)' | 512.33 |
| 'Protein target(cytosol)'                        | 511.67 |



|                                          |        |
|------------------------------------------|--------|
| 'clathrin(cytosol)'                      | 511.67 |
| 'ubiquitin-binding adaptor(cytosol)'     | 511.00 |
| 'VCP(cytosol)'                           | 510.33 |
| 'RasGRF(cytosol)'                        | 509.83 |
| 'UBE4A(cytosol)'                         | 509.67 |
| 'VCP (R115H)(cytosol)'                   | 509.00 |
| 'MAP3K5(cytosol)'                        | 508.67 |
| 'VCP (mutated)(cytosol)'                 | 508.33 |
| 'UBE4B(cytosol)'                         | 507.67 |
| 'misfolded transmembrane ER protein(ER)' | 507.00 |
| 'Doa10p(ER)'                             | 506.33 |
| 'ATXN3 (polyQ)(cytosol)'                 | 505.67 |
| 'COX7A2L(Nucleus)'                       | 505.50 |
| 'COX7B(Nucleus)'                         | 505.50 |
| 'COX7C(Nucleus)'                         | 505.50 |
| 'CYCS(Nucleus)'                          | 505.50 |
| 'NDUFA8(Nucleus)'                        | 505.50 |
| 'NDUFAB1(Nucleus)'                       | 505.50 |
| 'NDUFB3(Nucleus)'                        | 505.50 |
| 'NDUFB5(Nucleus)'                        | 505.50 |
| 'NDUFB6(Nucleus)'                        | 505.50 |
| 'ATP5A1(Nucleus)'                        | 505.50 |
| 'ATP5C1(Nucleus)'                        | 505.50 |
| 'ATP5D(Nucleus)'                         | 505.50 |
| 'ATP5L(Nucleus)'                         | 505.50 |
| 'ATP5O(Nucleus)'                         | 505.50 |
| 'COX5B(Nucleus)'                         | 505.50 |
| 'COX6A1(Nucleus)'                        | 505.50 |
| 'COX7A1(Nucleus)'                        | 505.50 |
| 'COX7A2(Nucleus)'                        | 505.50 |
| 'NDUFC1(Nucleus)'                        | 505.50 |
| 'NDUFS3(Nucleus)'                        | 505.50 |
| 'NDUFS5(Nucleus)'                        | 505.50 |
| 'SDHA(Nucleus)'                          | 505.50 |

|                                                 |        |
|-------------------------------------------------|--------|
| 'SDHB(Nucleus)'                                 | 505.50 |
| 'SLC25A4(Nucleus)'                              | 505.50 |
| 'SLC25A5(Nucleus)'                              | 505.50 |
| 'UQCRB(Nucleus)'                                | 505.50 |
| 'CASP9(cytosol)'                                | 505.33 |
| 'ATXN3(cytosol)'                                | 505.00 |
| 'LRRK2(cytosol)'                                | 504.33 |
| 'dynein(cytosol)'                               | 503.67 |
| 'misfolded PARK7(cytosol)'                      | 503.00 |
| 'ATP-dependent unfoldase(cytosol)'              | 502.33 |
| 'DUB(cytosol)'                                  | 501.67 |
| 'chaperones(cytosol)'                           | 501.00 |
| 'E4(cytosol)'                                   | 500.33 |
| 'CAMK4(cytosol)'                                | 499.67 |
| 'CRTC1(cytosol)'                                | 499.00 |
| 'CREBBP(Nucleus)'                               | 498.33 |
| 'PRKACB(Nucleus)'                               | 497.67 |
| 'PRKACA(Nucleus)'                               | 497.00 |
| 'PRKACG(Nucleus)'                               | 496.33 |
| 'Jacob(cytosol)'                                | 495.67 |
| '3-O-Methyldopamine(cytosol)'                   | 495.33 |
| 'importin-?(cytosol)'                           | 495.00 |
| 'CABP1(cytosol)'                                | 494.33 |
| 'RPS6KA3(cytosol)'                              | 493.67 |
| 'RPS6KA6(cytosol)'                              | 493.00 |
| 'RPS6KA2(cytosol)'                              | 492.33 |
| 'RPS6KA1(cytosol)'                              | 491.67 |
| 'PDK1(cytosol)'                                 | 491.00 |
| 'mtDNA deletion(Mitochondrial Inner membrane)'  | 490.67 |
| 'CALM1(cytosol)'                                | 490.33 |
| 'mtDNA mutations(Mitochondrial Inner membrane)' | 489.67 |
| 'DLG1(cytosol)'                                 | 489.67 |
| 'MYO6(cytosol)'                                 | 489.00 |
| 'GLUD1(Mitochondrial Inner membrane)'           | 488.33 |

|                                              |        |
|----------------------------------------------|--------|
| 'BDH1(Mitochondrial Inner membrane)'         | 487.67 |
| 'HMGC2(Mitochondrial Inner membrane)'        | 487.00 |
| 'ACSS1(Mitochondrial Inner membrane)'        | 486.33 |
| 'PFKM(cytosol)'                              | 485.67 |
| 'PGF2 alpha(cytosol)'                        | 485.17 |
| 'PGK1(cytosol)'                              | 485.00 |
| 'G6PC(cytosol)'                              | 484.33 |
| 'GALM(cytosol)'                              | 483.67 |
| 'PGM1(cytosol)'                              | 483.00 |
| 'FBP1(cytosol)'                              | 482.33 |
| 'PFKL(cytosol)'                              | 481.67 |
| 'TPI1(cytosol)'                              | 481.00 |
| 'GAPDH(cytosol)'                             | 480.33 |
| 'PGAM4(cytosol)'                             | 479.67 |
| 'ENO1(cytosol)'                              | 479.00 |
| 'PKLR(cytosol)'                              | 478.33 |
| 'ADH1A(cytosol)'                             | 477.67 |
| 'AKR1A1(cytosol)'                            | 477.00 |
| 'ALDH3A1(cytosol)'                           | 476.33 |
| 'COX6A1(cytosol)'                            | 475.83 |
| 'OXCT1(Mitochondrial Inner membrane)'        | 475.67 |
| 'PC(Mitochondrial Inner membrane)'           | 475.00 |
| 'GCK(cytosol)'                               | 474.33 |
| 'Synaptic transmission dysfunction(default)' | 474.33 |
| 'HK1(cytosol)'                               | 473.67 |
| 'ACAT1(Mitochondrial Inner membrane)'        | 473.00 |
| 'ACSS2(cytosol)'                             | 472.33 |
| 'ALDOA(cytosol)'                             | 471.67 |
| 'HMGCL(Mitochondrial Inner membrane)'        | 471.00 |
| 'BPGM(cytosol)'                              | 470.33 |
| 'GPI(cytosol)'                               | 469.67 |
| 'GBA(Lysosome)'                              | 469.00 |
| 's5073(cytosol)'                             | 468.67 |
| 'MICU1(Mitochondrial Inner membrane)'        | 468.33 |

|                     |        |
|---------------------|--------|
| 'HDAC6(cytosol)'    | 467.67 |
| 'NDUFB5(cytosol)'   | 467.00 |
| 'NDUFAB1(cytosol)'  | 467.00 |
| 'NDUFA8(cytosol)'   | 467.00 |
| 'UQCRB(cytosol)'    | 467.00 |
| 'SDHA(cytosol)'     | 467.00 |
| 'NDUFS5(cytosol)'   | 467.00 |
| 'NDUFC1(cytosol)'   | 467.00 |
| 'NDUFB3(cytosol)'   | 467.00 |
| 'ATP5D(cytosol)'    | 467.00 |
| 'NDUFB6(cytosol)'   | 467.00 |
| 'COX7B(cytosol)'    | 467.00 |
| 'COX7A2L(cytosol)'  | 467.00 |
| 'COX5B(cytosol)'    | 467.00 |
| 'ATP5O(cytosol)'    | 467.00 |
| 'ATP5L(cytosol)'    | 467.00 |
| 'ATP5A1(cytosol)'   | 467.00 |
| 'UQCRC1(cytosol)'   | 467.00 |
| 'SLC25A5(cytosol)'  | 467.00 |
| 'SLC25A4(cytosol)'  | 467.00 |
| 'COX7A1(cytosol)'   | 467.00 |
| 'ATP5C1(cytosol)'   | 467.00 |
| 'COX7A2(cytosol)'   | 467.00 |
| 'SDHB(cytosol)'     | 467.00 |
| 'COX7C(cytosol)'    | 467.00 |
| 'SQSTM1(cytosol)'   | 467.00 |
| 'STK11 (cytosol)'   | 466.33 |
| 'PE(cytosol)'       | 465.67 |
| 'CASP7(cytosol)'    | 465.00 |
| 'MAP1LC3A(cytosol)' | 465.00 |
| 'CASP9(cytosol)'    | 464.67 |
| 'ZNF746(Nucleus)'   | 464.33 |
| 'CASP3(cytosol)'    | 463.83 |
| 'ZNF746(cytosol)'   | 463.67 |

|                                                 |        |
|-------------------------------------------------|--------|
| 'CYCS(Mitochondrial Inner membrane)'            | 463.00 |
| 'SOD2(Mitochondrial Inner membrane)'            | 462.33 |
| 'PPARGC1A(Nucleus)'                             | 461.67 |
| 'ESRRA(Nucleus)'                                | 461.00 |
| 'MAP1LC3A (LC3-I)(cytosol)'                     | 460.33 |
| 'PIK3R4(cytosol)'                               | 459.67 |
| 'PIK3C3(cytosol)'                               | 459.00 |
| 'OPA1(Mitochondrial Inner membrane)'            | 458.33 |
| 'SFN(cytosol)'                                  | 458.17 |
| 'BMF(cytosol)'                                  | 457.83 |
| 'MTOR(cytosol)'                                 | 457.67 |
| 'phospho-dynein(DLC2) on microtubules(cytosol)' | 457.00 |
| 'phospho-dynein(DLC1) on microtubules(cytosol)' | 457.00 |
| 'BCL2L11(cytosol)'                              | 457.00 |
| 'XRCC6(cytosol)'                                | 457.00 |
| 'CASP8(cytosol)'                                | 456.33 |
| 'YWHAZ(cytosol)'                                | 456.00 |
| 'MAP2K6(cytosol)'                               | 455.67 |
| 'MAP2K3(cytosol)'                               | 455.00 |
| 'PPP5C(cytosol)'                                | 454.33 |
| 'TRAF6(cytosol)'                                | 453.67 |
| 'TRAF2(cytosol)'                                | 453.00 |
| 'CLSPN(Nucleus)'                                | 452.33 |
| 'VDAC1(Mitochondrial outer membrane)'           | 451.67 |
| 'DBNL(cytosol)'                                 | 451.00 |
| 'GSN(cytosol)'                                  | 450.33 |
| 'BMX(cytosol)'                                  | 449.67 |
| 'MAPK1(cytosol)'                                | 449.33 |
| 'MST4(cytosol)'                                 | 449.00 |
| 'SPTAN1(cytosol)'                               | 448.33 |
| 'ACIN1(cytosol)'                                | 447.67 |
| 'ADD1(cytosol)'                                 | 447.00 |
| 'PRKCD(cytosol)'                                | 446.33 |
| 'PAK2(cytosol)'                                 | 445.67 |

|                                         |        |
|-----------------------------------------|--------|
| 'PRKCQ(cytosol)'                        | 445.00 |
| 'FNNTA(cytosol)'                        | 444.33 |
| 'DFFA (fragment 225-331)(Nucleus)'      | 444.17 |
| 'BCAP31(ER)'                            | 443.67 |
| 'ROCK1(cytosol)'                        | 443.00 |
| 'BIRC2(cytosol)'                        | 442.33 |
| 'DFFA (fragment 118-224)(Nucleus)'      | 441.67 |
| 'GAS2(cytosol)'                         | 441.67 |
| 'DFFA (fragment 1-117)(Nucleus)'        | 441.67 |
| 'VIM (fragment 2-466)(cytosol)'         | 441.00 |
| 'SATB1(Nucleus)'                        | 440.33 |
| 'LMNB1(Nucleus)'                        | 439.67 |
| 'LMNA(Nucleus)'                         | 439.00 |
| 'BMF(Mitochondrial outer membrane)'     | 438.67 |
| 'OCLN(cytosol)'                         | 438.33 |
| 'BCL2L11(Mitochondrial outer membrane)' | 437.67 |
| 'PKP1(cytosol)'                         | 437.67 |
| 'DSG3(cytosol)'                         | 437.00 |
| 'TJP2(cytosol)'                         | 436.33 |
| 'DSP(cytosol)'                          | 435.67 |
| 'TJP1(cytosol)'                         | 435.00 |
| 'DSG1(cytosol)'                         | 434.33 |
| 'AKT1(cytosol)'                         | 433.67 |
| 'CASP2(cytosol)'                        | 433.00 |
| 'BID(cytosol)'                          | 432.33 |
| 'CYCS(Mitochondrial outer membrane)'    | 431.67 |
| 'DIABLO(Mitochondrial outer membrane)'  | 431.00 |
| 'Amino acids(cytosol)'                  | 430.67 |
| 'BCL2(Mitochondrial outer membrane)'    | 430.33 |
| 'GZMB(cytosol)'                         | 429.67 |
| 'AKT1 (cytosol)'                        | 429.00 |
| 'BCL2(cytosol)'                         | 428.33 |
| 'TP53(Nucleus)'                         | 427.67 |
| 'SIRT5(Mitochondrial Inner membrane)'   | 427.00 |

|                                                                |        |
|----------------------------------------------------------------|--------|
| 'SIRT3(Mitochondrial Inner membrane)'                          | 426.33 |
| 'PRDX5(Mitochondrial Inner membrane)'                          | 425.67 |
| 'PRDX3(Mitochondrial Inner membrane)'                          | 425.00 |
| 'PRDX2(Mitochondrial Inner membrane)'                          | 424.33 |
| 'PRDX1(Mitochondrial Inner membrane)'                          | 423.67 |
| 'GPX1(Mitochondrial Inner membrane)'                           | 423.00 |
| 'D2HGDH(Mitochondrial Inner membrane)'                         | 422.33 |
| 'ADHFE1(Mitochondrial Inner membrane)'                         | 421.67 |
| 'mitochondrial pyruvate carrier(Mitochondrial outer membrane)' | 421.00 |
| 'PDK3 (Mitochondrial Inner membrane)'                          | 420.33 |
| 'O2-(cytosol)'                                                 | 420.33 |
| 'PDK1 (Mitochondrial Inner membrane)'                          | 419.67 |
| 'GSR(Mitochondrial Inner membrane)'                            | 419.00 |
| 'GPX4(Mitochondrial Inner membrane)'                           | 418.33 |
| 'SOD1(Mitochondrial outer membrane)'                           | 417.67 |
| 'TXNRD2(Mitochondrial Inner membrane)'                         | 417.00 |
| 'CAT(Mitochondrial Inner membrane)'                            | 416.33 |
| 'SLC25A5(Mitochondrial Inner membrane)'                        | 415.67 |
| 'SLC25A4(Mitochondrial Inner membrane)'                        | 415.00 |
| 'CACNA1D(cytosol)'                                             | 414.33 |
| 'UCP3(Mitochondrial Inner membrane)'                           | 413.67 |
| 'UCP2(Mitochondrial Inner membrane)'                           | 413.00 |
| 'SYT11(cytosol)'                                               | 412.33 |
| 'PARK2(cytosol)'                                               | 411.67 |
| 'SNCA(cytosol)'                                                | 411.00 |
| 'ALDH2(Mitochondrial Inner membrane)'                          | 410.33 |
| 'permeable pore(cytosol)'                                      | 410.17 |
| 'DSG2(cytosol)'                                                | 409.67 |
| 'ACO2(Mitochondrial Inner membrane)'                           | 409.00 |
| 'CDH1(cytosol)'                                                | 408.33 |
| 'L2HGDH(Mitochondrial Inner membrane)'                         | 407.67 |
| 'NMT1 (cytosol)'                                               | 407.00 |
| 'PLEC(cytosol)'                                                | 406.33 |
| 'APAF1(cytosol)'                                               | 405.67 |

|                                                              |        |
|--------------------------------------------------------------|--------|
| 'PDK4 (Mitochondrial Inner membrane)'                        | 405.00 |
| 'PDK2 (Mitochondrial Inner membrane)'                        | 404.33 |
| 'CTNNB1(cytosol)'                                            | 403.67 |
| 'COMT(cytosol)'                                              | 403.00 |
| 'misfolded SNCA(default)'                                    | 402.33 |
| 'absorptive endocytosis(cytosol)'                            | 401.67 |
| 'Starvation(cytosol)'                                        | 401.00 |
| 'high concentration of $\beta$ -nuclein(cytosol)'            | 400.33 |
| 'pharmacological stimulations of synaptic activity(cytosol)' | 399.67 |
| 'KCl-induced depolarization(cytosol)'                        | 399.00 |
| 'shuttling factors(cytosol)'                                 | 398.33 |
| 'diffusion(cytosol)'                                         | 397.67 |
| 'Carorie_br_restriction(Mitochondrial Inner membrane)'       | 397.00 |
| 'Carbon fixation in photosynthetic organisms(cytosol)'       | 396.33 |
| 'succinyl CoA/CoA ratio(Mitochondrial Inner membrane)'       | 395.67 |
| 'NADH/NAD <sup>+</sup> ratio(Mitochondrial Inner membrane)'  | 395.00 |
| 'ATP/ADP ratio(Mitochondrial Inner membrane)'                | 394.33 |
| 'NOS(Mitochondrial Inner membrane)'                          | 393.67 |
| 'Amino Acids(cytosol)'                                       | 393.00 |
| 'AMP/ATP ratio(cytosol)'                                     | 392.33 |
| 'Maturing Phagopore(cytosol)'                                | 391.67 |
| 'Calorie Restriction(Nucleus)'                               | 391.00 |
| 'Lysosome(cytosol)'                                          | 390.33 |
| 'Phagophore(cytosol)'                                        | 389.67 |
| 'Excess of $\alpha$ -synuclein(cytosol)'                     | 389.00 |
| 'Acetyl-CoA/CoA(Mitochondrial Inner membrane)'               | 388.33 |
| 'NADH/NAD <sup>+</sup> (Mitochondrial Inner membrane)'       | 387.67 |
| 'Ca <sup>2+</sup> (Mitochondrial outer membrane)'            | 387.00 |
| 'Na <sup>+</sup> (default)'                                  | 386.33 |
| 'Na <sup>+</sup> (default)'                                  | 385.67 |
| 'Co <sup>2+</sup> (Mitochondrial Inner membrane)'            | 385.00 |
| 'Ca <sup>2+</sup> (default)'                                 | 384.33 |
| 'Mg <sup>++</sup> (Mitochondrial Inner membrane)'            | 383.67 |
| 'Mn <sup>2+</sup> (Mitochondrial Inner membrane)'            | 383.00 |



|                                      |        |
|--------------------------------------|--------|
| 'Zn2+(Mitochondrial Inner membrane)' | 382.33 |
| 'ATF3(Nucleus)'                      | 381.67 |
| 'BTG2(Nucleus)'                      | 381.00 |
| 'BCL6(Nucleus)'                      | 380.33 |
| 'GADD45B(Nucleus)'                   | 379.67 |
| 'GADD45G(Nucleus)'                   | 379.00 |
| 'INHBA(Nucleus)'                     | 378.33 |
| 'Npas4(Nucleus)'                     | 377.67 |
| 'Nr4a1(Nucleus)'                     | 377.00 |
| 'Serpinb 2(Nucleus)'                 | 376.33 |
| 'Bdnf(Nucleus)'                      | 375.67 |
| 'PPARGC1A(Nucleus)'                  | 375.00 |
| 'SIRT3(Nucleus)'                     | 374.33 |
| 'UQCRC1(Nucleus)'                    | 373.67 |
| 'UQCRB(Nucleus)'                     | 373.00 |
| 'SLC25A5(Nucleus)'                   | 372.33 |
| 'SLC25A4(Nucleus)'                   | 371.67 |
| 'SDHB(Nucleus)'                      | 371.00 |
| 'SDHA(Nucleus)'                      | 370.33 |
| 'NDUFS5(Nucleus)'                    | 369.67 |
| 'NDUFS3(Nucleus)'                    | 369.00 |
| 'NDUFC1(Nucleus)'                    | 368.33 |
| 'COX7A2(Nucleus)'                    | 367.67 |
| 'COX7A1(Nucleus)'                    | 367.00 |
| 'COX6A1(Nucleus)'                    | 366.33 |
| 'COX5B(Nucleus)'                     | 365.67 |
| 'ATP5O(Nucleus)'                     | 365.00 |
| 'ATP5L(Nucleus)'                     | 364.33 |
| 'ATP5D(Nucleus)'                     | 363.67 |
| 'ATP5C1(Nucleus)'                    | 363.00 |
| 'ATP5A1(Nucleus)'                    | 362.33 |
| 'COX7A2L(Nucleus)'                   | 361.67 |
| 'COX7B(Nucleus)'                     | 361.00 |
| 'COX7C(Nucleus)'                     | 360.33 |

|                                                                    |        |
|--------------------------------------------------------------------|--------|
| 'NDUFB5(Nucleus)'                                                  | 359.67 |
| 'NDUFB6(Nucleus)'                                                  | 359.00 |
| 'SLC25A14(Nucleus)'                                                | 358.33 |
| 'SLC25A27(Nucleus)'                                                | 357.67 |
| 'DNA(Nucleus)'                                                     | 357.00 |
| 'NDUFB3(Nucleus)'                                                  | 356.33 |
| 'NDUFAB1(Nucleus)'                                                 | 355.67 |
| 'NDUFA8(Nucleus)'                                                  | 355.00 |
| 'CYCS(Nucleus)'                                                    | 354.33 |
| 'CCCP(Mitochondrial Inner membrane)'                               | 353.67 |
| 'GlcNAC(cytosol)'                                                  | 353.00 |
| 'WGA(cytosol)'                                                     | 352.33 |
| 'geldanamycin(cytosol)'                                            | 351.67 |
| 'dexamethasone(cytosol)'                                           | 351.00 |
| 'proteasome inhibitor(cytosol)'                                    | 350.33 |
| 'paraquat(cytosol)'                                                | 349.67 |
| 'CCCP(cytosol)'                                                    | 349.00 |
| 'Rapamycin(cytosol)'                                               | 348.33 |
| 'Diazoxide(Mitochondrial outer membrane)'                          | 347.67 |
| 'Rotenone(Mitochondrial Inner membrane)'                           | 347.00 |
| 'Mixothiazol(Mitochondrial Inner membrane)'                        | 346.33 |
| 's1276(Nucleus)'                                                   | 345.67 |
| 's1275(Nucleus)'                                                   | 345.00 |
| 'PINK1:MAPK14(Mitochondrial outer membrane)'                       | 344.33 |
| 'IKK complex(cytosol)'                                             | 343.67 |
| 'Casein Kinase 2(cytosol)'                                         | 343.00 |
| 'SLC16A8:BSG(cytosol)'                                             | 342.33 |
| 'SLC16A1:BSG(cytosol)'                                             | 341.67 |
| 'SLC16A3:BSG(cytosol)'                                             | 341.00 |
| 'Trifunctional Protein(Mitochondrial Inner membrane)'              | 340.33 |
| 'MUT dimer(Mitochondrial Inner membrane)'                          | 339.67 |
| 'propionyl-CoA carboxylase protomer(Mitochondrial Inner membrane)' | 339.00 |
| 'TIM Complex(Mitochondrial Inner membrane)'                        | 338.33 |
| 'TOM complex(Mitochondrial outer membrane)'                        | 337.67 |

|                                                                                 |        |
|---------------------------------------------------------------------------------|--------|
| 'ATG1 kinase complex(cytosol)'                                                  | 337.00 |
| 'TORC2:14-3-3(cytosol)'                                                         | 336.33 |
| 'NMDA receptor complex(cytosol)'                                                | 335.67 |
| 'Ras:GDP(cytosol)'                                                              | 335.00 |
| 'AMPA receptors containing GluR2 (homomers)(cytosol)'                           | 334.33 |
| 'CaMKII(cytosol)'                                                               | 333.67 |
| 'SCF complex(cytosol)'                                                          | 333.00 |
| 'caspase-6(Nucleus)'                                                            | 332.33 |
| 'Acetylated isocitrate dehydrogenase(Mitochondrial Inner membrane)'             | 331.67 |
| 'Acetylated succinate dehydrogenase (complex II)(Mitochondrial Inner membrane)' | 331.00 |
| 'Acetylated NADH-Q oxireductase (complex I)(Mitochondrial Inner membrane)'      | 330.33 |
| 'Caspase-8(cytosol)'                                                            | 329.67 |
| 'Atg complex(cytosol)'                                                          | 329.00 |
| 'Thioredoxin:ASK1(cytosol)'                                                     | 328.33 |
| 'Succinyl-CoA ligase(Mitochondrial Inner membrane)'                             | 327.67 |
| 'HMGB1/HMGB2(Nucleus)'                                                          | 327.00 |
| 'DFF45:DFF40 complex(Nucleus)'                                                  | 326.33 |
| 'Histone H1 bound chromatin DNA(Nucleus)'                                       | 325.67 |
| 'APC(cytosol)'                                                                  | 325.00 |
| 'Caspase-7(cytosol)'                                                            | 324.33 |
| 'PIDDsome(cytosol)'                                                             | 323.67 |
| 'XIAP:Caspase-9(cytosol)'                                                       | 323.00 |
| 'XIAP:Caspase-7(cytosol)'                                                       | 322.33 |
| 'XIAP:Caspase-3(cytosol)'                                                       | 321.67 |
| 'Calcineurin B complex(cytosol)'                                                | 321.00 |
| 'Caspase-8 dimer(cytosol)'                                                      | 320.33 |
| 'BMF sequestered to dynein (DLC2)(cytosol)'                                     | 319.67 |
| 'Succinyl-CoA ligase(Mitochondrial Inner membrane)'                             | 319.00 |
| 'malate dehydrogenase 2(Mitochondrial Inner membrane)'                          | 318.33 |
| 'PDP1 complex(Mitochondrial Inner membrane)'                                    | 317.67 |
| 'lactate dehydrogenase B4 complex(cytosol)'                                     | 317.00 |
| 'Tyrosine 3-monooxygenase (Fe2+ cofactor)(cytosol)'                             | 316.33 |
| 'cytochrome c oxidase (complex IV)(Mitochondrial Inner membrane)'               | 315.67 |
| 'F0F1-ATP synthase (complex V)(Mitochondrial Inner membrane)'                   | 315.00 |

|                                                                           |        |
|---------------------------------------------------------------------------|--------|
| 'fumarate hydratase(Mitochondrial Inner membrane)'                        | 314.33 |
| 'isocitrate dehydrogenase 3 complex(Mitochondrial Inner membrane)'        | 313.67 |
| 'PDP2 complex(Mitochondrial Inner membrane)'                              | 313.00 |
| 'lactate dehydrogenase A2B2 complex(cytosol)'                             | 312.33 |
| 'NNT dimer(Mitochondrial Inner membrane)'                                 | 311.67 |
| 'caspase-3(cytosol)'                                                      | 311.00 |
| 'caspase-6(cytosol)'                                                      | 310.33 |
| 'alpha-ketoglutarate dehydrogenase complex(Mitochondrial Inner membrane)' | 309.67 |
| 'BIM sequestered to dynein (DLC1)(cytosol)'                               | 309.00 |
| 'DP-1:E2F1 complex(Nucleus)'                                              | 308.33 |
| 'caspase-7(Nucleus)'                                                      | 307.67 |
| 'Citrate Synthase Holoenzyme(Mitochondrial Inner membrane)'               | 307.00 |
| 'lactate dehydrogenase A4 complex(cytosol)'                               | 306.33 |
| 'lactate dehydrogenase AB3 complex(cytosol)'                              | 305.67 |
| 'lactate dehydrogenase A3B complex(cytosol)'                              | 305.00 |
| 'DDC dimer (cytosol)'                                                     | 304.33 |

**Outward Information**  
**Node Names (Position)**

|                                                       | <b>Scores</b> |
|-------------------------------------------------------|---------------|
| 'ATP(cytosol)'                                        | 957.67        |
| 'H+(cytosol)'                                         | 954.00        |
| 'H2O2(cytosol)'                                       | 936.67        |
| 'HOO•(cytosol)'                                       | 913.50        |
| 'NAD+(cytosol)'                                       | 912.83        |
| '26S hybrid proteasome(cytosol)'                      | 909.17        |
| 'lactate dehydrogenase B4 complex(cytosol)'           | 907.17        |
| 'lactate dehydrogenase A3B complex(cytosol)'          | 905.17        |
| 'lactate dehydrogenase AB3 complex(cytosol)'          | 905.17        |
| 'lactate dehydrogenase A4 complex(cytosol)'           | 905.17        |
| 'lactate dehydrogenase A2B2 complex(cytosol)'         | 905.17        |
| 'Acetyl-CoA(cytosol)'                                 | 904.33        |
| 'CaMKII(cytosol)'                                     | 902.83        |
| 'CoA-SH(cytosol)'                                     | 898.67        |
| 'OH•(cytosol)'                                        | 898.33        |
| 'L-Lactate (cytosol)'                                 | 897.50        |
| 'TARP:DLG4:MDM2(cytosol)'                             | 892.50        |
| 'AMPA receptors containing GluR2 (homomers)(cytosol)' | 890.50        |
| 'EPB41L1(cytosol)'                                    | 890.50        |
| 'MYO6(cytosol)'                                       | 890.50        |
| 'DLG1(cytosol)'                                       | 890.50        |
| 'AKAP5(cytosol)'                                      | 889.50        |
| 'DUB(cytosol)'                                        | 886.83        |
| 'Phosphoenolpyruvate(cytosol)'                        | 886.83        |
| 'PPARGC1A(Nucleus)'                                   | 885.33        |
| 'SLC16A8:BSG(cytosol)'                                | 882.33        |
| 'SLC16A3:BSG(cytosol)'                                | 880.17        |

|                                                       |        |
|-------------------------------------------------------|--------|
| 'SLC16A1:BSG(cytosol)'                                | 880.17 |
| 'Pyruvate (cytosol)'                                  | 878.83 |
| 'Apoptosome (cytosol)'                                | 876.33 |
| 'Fe(III)(cytosol)'                                    | 875.33 |
| 'K48 polyubiquitinated protein(cytosol)'              | 875.00 |
| 'NADPH(cytosol)'                                      | 870.67 |
| 'ACC2(cytosol)'                                       | 869.50 |
| 'Ca2+(Mitochondrial Inner membrane)'                  | 863.33 |
| 'ROS(cytosol)'                                        | 862.33 |
| 'ATP-dependent unfoldase(cytosol)'                    | 861.50 |
| 'H2O2(Mitochondrial Inner membrane)'                  | 860.67 |
| 'Ca2+(cytosol)'                                       | 860.50 |
| 'Citrate lyase(cytosol)'                              | 858.00 |
| 'Citrate(cytosol)'                                    | 856.83 |
| 'beta-D-Fructose 6-phosphate(cytosol)'                | 855.67 |
| 'AMPK(cytosol)'                                       | 855.33 |
| 'Malonyl-CoA(cytosol)'                                | 854.00 |
| 'dexamethasone(cytosol)'                              | 850.17 |
| 'PARK2(cytosol)'                                      | 849.67 |
| 'CoA-SH(Mitochondrial Inner membrane)'                | 847.33 |
| 'ROS(Mitochondrial Inner membrane)'                   | 845.83 |
| 'H+(Mitochondrial Inner membrane)'                    | 845.50 |
| 'NAD+(Mitochondrial Inner membrane)'                  | 845.17 |
| 'H2O(Mitochondrial Inner membrane)'                   | 845.00 |
| 'FAD(Mitochondrial Inner membrane)'                   | 843.33 |
| 'OH•(Mitochondrial Inner membrane)'                   | 840.17 |
| 'ACC1(cytosol)'                                       | 839.83 |
| 'HCO3-(cytosol)'                                      | 839.33 |
| 'Raf/Mek(cytosol)'                                    | 839.17 |
| 'Trifunctional Protein(Mitochondrial Inner membrane)' | 838.83 |
| 'SIRT3(Mitochondrial Inner membrane)'                 | 836.50 |
| 'caspase-3(cytosol)'                                  | 836.17 |
| 'Pyruvate (Mitochondrial Inner membrane)'             | 835.00 |
| 'O2(cytosol)'                                         | 834.83 |

|                                                                                |        |
|--------------------------------------------------------------------------------|--------|
| 'ubiquinol_cytochrome-c reductase (complex III)(Mitochondrial Inner membrane)' | 834.67 |
| 'CREB dependent_br_transcription(Nucleus)'                                     | 834.17 |
| 'NADH(Mitochondrial Inner membrane)'                                           | 833.50 |
| 'ubiquitin(cytosol)'                                                           | 832.33 |
| 'H+(Mitochondrial outer membrane)'                                             | 829.83 |
| 'NADH/NAD+ ratio(Mitochondrial Inner membrane)'                                | 829.83 |
| 'activated LRRK2(cytosol)'                                                     | 828.67 |
| 'PKLR(cytosol)'                                                                | 827.17 |
| 'ACADL(Mitochondrial Inner membrane)'                                          | 826.83 |
| 'ADP(cytosol)'                                                                 | 826.50 |
| 'Pentose phosphate pathway(cytosol)'                                           | 826.00 |
| 'alpha-D-Glucose 6-phosphate(cytosol)'                                         | 825.83 |
| 'GCK(cytosol)'                                                                 | 825.50 |
| 'FASN(cytosol)'                                                                | 824.83 |
| 'NADH-Q oxireductase (complex I)(Mitochondrial Inner membrane)'                | 824.50 |
| 'HK1(cytosol)'                                                                 | 824.50 |
| 'BDH1(Mitochondrial Inner membrane)'                                           | 824.17 |
| 'alpha-D-Glucose(cytosol)'                                                     | 824.00 |
| 'fatty acyl CoA(cytosol)'                                                      | 823.00 |
| '2-Oxoglutarate(Mitochondrial Inner membrane)'                                 | 821.17 |
| 'NAD+ (Mitochondrial Inner membrane)'                                          | 820.83 |
| 'pyruvate dehydrogenase complex(Mitochondrial Inner membrane)'                 | 819.17 |
| 'Fe(II)(cytosol)'                                                              | 817.67 |
| 'CASP3(cytosol)'                                                               | 817.67 |
| 'Isocitrate(Mitochondrial Inner membrane)'                                     | 816.00 |
| 'beta-D-Glucose(cytosol)'                                                      | 814.33 |
| 'NADH(cytosol)'                                                                | 811.83 |
| 'HADH(Mitochondrial Inner membrane)'                                           | 810.67 |
| 'HOO•(Mitochondrial Inner membrane)'                                           | 810.17 |
| 'succinyl CoA/CoA ratio(Mitochondrial Inner membrane)'                         | 809.83 |
| 'linoleoyl-CoA(Mitochondrial Inner membrane)'                                  | 801.83 |
| 'ELOVL6(c26)'                                                                  | 801.83 |
| 'ELOVL1(c26)'                                                                  | 800.17 |
| 'ELOVL2(c26)'                                                                  | 800.17 |

|                                                                           |        |
|---------------------------------------------------------------------------|--------|
| 'ELOVL3(c26)'                                                             | 800.17 |
| 'trans-cis-Lauro-2-6-dienoyl-CoA (Mitochondrial Inner membrane)'          | 799.50 |
| 'Succinyl-CoA(Mitochondrial Inner membrane)'                              | 798.83 |
| 'ATP/ADP ratio(Mitochondrial Inner membrane)'                             | 798.67 |
| 'L-Lactate (default)'                                                     | 798.17 |
| 'ALDH2(Mitochondrial Inner membrane)'                                     | 797.33 |
| 'H+(default)'                                                             | 797.17 |
| 'MAPK1(cytosol)'                                                          | 794.50 |
| 'alpha-ketoglutarate dehydrogenase complex(Mitochondrial Inner membrane)' | 793.33 |
| 'Caspase-8(cytosol)'                                                      | 791.17 |
| 'Acetyl-CoA (Mitochondrial Inner membrane)'                               | 789.83 |
| 'ROS(default)'                                                            | 789.50 |
| 'CoA-SH (Mitochondrial Inner membrane)'                                   | 788.83 |
| '1-3-Bisphospho-D-glycerate(cytosol)'                                     | 787.67 |
| 'O2-(cytosol)'                                                            | 787.50 |
| 'palmitoyl-CoA(cytosol)'                                                  | 787.50 |
| 'COMT(cytosol)'                                                           | 787.00 |
| 'PDK1(cytosol)'                                                           | 787.00 |
| 'L-Glutamate(default)'                                                    | 786.83 |
| 'NADPH(Mitochondrial Inner membrane)'                                     | 785.67 |
| 'D-Glyceraldehyde 3-phosphate(cytosol)'                                   | 784.33 |
| 'isocitrate dehydrogenase(Mitochondrial Inner membrane)'                  | 783.50 |
| 'ACAT1(Mitochondrial Inner membrane)'                                     | 783.50 |
| 'ELOVL4(c26)'                                                             | 783.50 |
| 'Rotenone(Mitochondrial Inner membrane)'                                  | 783.17 |
| 'Mixothiazol(Mitochondrial Inner membrane)'                               | 782.67 |
| 'isocitrate dehydrogenase 3 complex(Mitochondrial Inner membrane)'        | 781.17 |
| 'Cytochrome C:Apaf-1:ATP:Procaspase-9(cytosol)'                           | 781.17 |
| 'arachidoyl-CoA(cytosol)'                                                 | 781.00 |
| 'ELOVL7(c26)'                                                             | 781.00 |
| 'tetracosanoyl-CoA(cytosol)'                                              | 781.00 |
| 'NADP+(Mitochondrial Inner membrane)'                                     | 779.33 |
| 'Dopamine(cytosol)'                                                       | 777.83 |
| 'ELOVL5(c26)'                                                             | 777.33 |



|                                                        |        |
|--------------------------------------------------------|--------|
| 'ubiquinone(Mitochondrial Inner membrane)'             | 776.67 |
| 'L-Malate (Mitochondrial Inner membrane)'              | 776.50 |
| 'MAP2K7(cytosol)'                                      | 775.50 |
| 'MAPK8(cytosol)'                                       | 774.67 |
| 'MAP2K4(cytosol)'                                      | 774.50 |
| 'GLUD1(Mitochondrial Inner membrane)'                  | 773.33 |
| 'L-Glutamate(Mitochondrial Inner membrane)'            | 772.50 |
| 'permeable pore(cytosol)'                              | 771.83 |
| 'VCP(cytosol)'                                         | 771.33 |
| 'Glycine(default)'                                     | 770.33 |
| 'Acetoacetate(Mitochondrial Inner membrane)'           | 769.83 |
| 'Orthophosphate(Mitochondrial Inner membrane)'         | 768.50 |
| 'arachidonoyl-CoA(cytosol)'                            | 768.50 |
| 'MAPK1(cytosol)'                                       | 768.33 |
| 'beta-D-Fructose 1-6-bisphosphate(cytosol)'            | 768.33 |
| 'ADP(Mitochondrial Inner membrane)'                    | 767.50 |
| 'ACADM(Mitochondrial Inner membrane)'                  | 766.67 |
| 'Protein target(cytosol)'                              | 763.17 |
| 'acetoacetate(Mitochondrial Inner membrane)'           | 762.83 |
| 'SNCA (oligomer)(cytosol)'                             | 762.83 |
| 'malate dehydrogenase 2(Mitochondrial Inner membrane)' | 762.67 |
| 'PFKM(cytosol)'                                        | 762.17 |
| 'DNM1L(Mitochondrial outer membrane)'                  | 761.67 |
| 'PFKL(cytosol)'                                        | 761.17 |
| '3-Phospho-D-glycerate(cytosol)'                       | 760.50 |
| 'ALDH3A1(cytosol)'                                     | 759.33 |
| 'ACSL6(c26)'                                           | 759.00 |
| '2-Phospho-D-glycerate(cytosol)'                       | 758.00 |
| 'MAPT(cytosol)'                                        | 757.50 |
| 'ACSL1(c26)'                                           | 757.17 |
| 'ACSL3(c26)'                                           | 757.17 |
| 'ACSL5(c26)'                                           | 757.17 |
| 'D-beta hydroxybutyrate(Mitochondrial Inner membrane)' | 756.83 |
| 'GAPDH(cytosol)'                                       | 755.83 |

|                                                            |        |
|------------------------------------------------------------|--------|
| 'ENO1(cytosol)'                                            | 755.67 |
| 'Palmitate(cytosol)'                                       | 755.67 |
| 'GK(cytosol)'                                              | 755.33 |
| 'misfolded SNCA(cytosol)'                                  | 754.50 |
| 'Glycerol(cytosol)'                                        | 754.17 |
| 'ACSL4(c26)'                                               | 751.00 |
| 'Arachidonate(cytosol)'                                    | 749.83 |
| 'PAK2 (p34)(cytosol)'                                      | 749.50 |
| 'VDAC1(Mitochondrial outer membrane)'                      | 748.83 |
| 'GPI(cytosol)'                                             | 748.67 |
| 'GDP1(cytosol)'                                            | 748.00 |
| 'DHAP(cytosol)'                                            | 746.50 |
| 'NO(cytosol)'                                              | 746.33 |
| 'Ca2+(default)'                                            | 743.83 |
| 'Succinyl-CoA ligase(Mitochondrial Inner membrane)'        | 743.50 |
| 'CASP9(cytosol)'                                           | 743.50 |
| 'CASP7(cytosol)'                                           | 743.00 |
| 'BPGM(cytosol)'                                            | 743.00 |
| 'NMDA receptor complex(cytosol)'                           | 741.00 |
| 'SNCA(cytosol)'                                            | 740.83 |
| 'DOPAL(cytosol)'                                           | 737.17 |
| 'GPAT2(Mitochondrial outer membrane)'                      | 737.17 |
| 'NNT dimer(Mitochondrial Inner membrane)'                  | 736.17 |
| 'Acetoacetyl-CoA(Mitochondrial Inner membrane)'            | 736.17 |
| '(S)-3-Hydroxybutanoyl-CoA(Mitochondrial Inner membrane)'  | 736.17 |
| 'BECN1(cytosol)'                                           | 735.83 |
| 'HMGCS2(Mitochondrial Inner membrane)'                     | 735.83 |
| 'AGPAT6(c26)'                                              | 735.50 |
| 'AGPAT9(c26)'                                              | 735.50 |
| 'GPAM(Mitochondrial outer membrane)'                       | 735.50 |
| 'AGPAT5(c26)'                                              | 734.67 |
| 'DIABLO(cytosol)'                                          | 733.50 |
| 'H2O (Mitochondrial Inner membrane)'                       | 733.50 |
| 'caspase-3-cleaved DFF45 (117-224):DFF40 complex(Nucleus)' | 732.67 |

|                                                                              |        |
|------------------------------------------------------------------------------|--------|
| 'AGPAT1(c26)'                                                                | 732.17 |
| 'AGPAT2(c26)'                                                                | 732.17 |
| 'AGPAT3(c26)'                                                                | 732.17 |
| 'AGPAT4(c26)'                                                                | 732.17 |
| 'SMAC:XIAP:Caspase-3(cytosol)'                                               | 731.17 |
| '(S)-Hydroxydecanoyl-CoA(Mitochondrial Inner membrane)'                      | 731.17 |
| 'GDP(Mitochondrial Inner membrane)'                                          | 730.33 |
| '(S)-Hydroxyoctanoyl-CoA(Mitochondrial Inner membrane)'                      | 729.83 |
| 'G3P(cytosol)'                                                               | 729.50 |
| '(S)-3-Hydroxyhexadecanoyl-CoA(Mitochondrial Inner membrane)'                | 728.83 |
| 'Succinyl-CoA ligase(Mitochondrial Inner membrane)'                          | 728.50 |
| 'Lysosome biogenesis(cytosol)'                                               | 728.00 |
| '1-acyl LPA(cytosol)'                                                        | 727.83 |
| '(S)-3-Hydroxytetradecanoyl-CoA(Mitochondrial Inner membrane)'               | 727.50 |
| '(S)-Hydroxyhexanoyl-CoA(Mitochondrial Inner membrane)'                      | 727.50 |
| 'Excess of _alpha_-synuclein(cytosol)'                                       | 726.33 |
| '(S)-3-Hydroxydodecanoyl-CoA(Mitochondrial Inner membrane)'                  | 726.17 |
| 'ubiquinol(Mitochondrial Inner membrane)'                                    | 725.50 |
| 'proteasome inhibitor(cytosol)'                                              | 724.83 |
| 'CYCS(Mitochondrial Inner membrane)'                                         | 724.50 |
| 'DGAT2(c26)'                                                                 | 723.00 |
| 'E2- E3-substrate complex(cytosol)'                                          | 721.83 |
| 'DGAT1(c26)'                                                                 | 721.83 |
| 'Fe(II)(Mitochondrial Inner membrane)'                                       | 720.33 |
| '5-hydroxyindole acetaldehyde(Mitochondrial Inner membrane)'                 | 720.17 |
| 'ALDOA(cytosol)'                                                             | 718.67 |
| 'DAG(cytosol)'                                                               | 718.67 |
| 'cytochrome c oxidase (complex IV)(Mitochondrial Inner membrane)'            | 717.67 |
| 'Docked dopamine loaded synaptic vesicle(Docked DA loaded synaptic vesicle)' | 716.33 |
| 'PPP2CA(cytosol)'                                                            | 716.00 |
| 'Microgria activation(microglia)'                                            | 715.83 |
| 'acetoacetyl-CoA(Mitochondrial Inner membrane)'                              | 715.67 |
| 'E3(cytosol)'                                                                | 715.50 |
| 'Fe(III)(Mitochondrial Inner membrane)'                                      | 714.83 |

|                                                        |        |
|--------------------------------------------------------|--------|
| '2-3-Bisphospho-D-glycerate(cytosol)'                  | 714.83 |
| 'Rapamycin(cytosol)'                                   | 714.67 |
| 'Acetyl-CoA(Mitochondrial Inner membrane)'             | 714.50 |
| 'MAOA:FAD(Mitochondrial outer membrane)'               | 714.50 |
| 'O2-(Mitochondrial Inner membrane)'                    | 713.33 |
| 'ATP(Mitochondrial Inner membrane)'                    | 710.83 |
| 'HMGCL(Mitochondrial Inner membrane)'                  | 710.67 |
| 'CAT(cytosol)'                                         | 710.50 |
| 'Calmodulin(cytosol)'                                  | 707.50 |
| 'membrane potential(Mitochondrial Inner membrane)'     | 706.50 |
| 'Autophagosome(cytosol)'                               | 705.83 |
| 'Lysosome(cytosol)'                                    | 705.83 |
| 'AKR1B1(cytosol)'                                      | 705.67 |
| 'ECHS1(Mitochondrial Inner membrane)'                  | 705.17 |
| 'AKR1A1(cytosol)'                                      | 702.50 |
| 'PGH2(cytosol)'                                        | 702.17 |
| 'Synaptic transmission dysfunction(default)'           | 701.33 |
| 'UCP3(Mitochondrial Inner membrane)'                   | 698.83 |
| 'TAK1(cytosol)'                                        | 698.17 |
| 'MAOB:FAD(Mitochondrial outer membrane)'               | 698.00 |
| 'SLC25A27(Mitochondrial Inner membrane)'               | 697.83 |
| 'UCP2(Mitochondrial Inner membrane)'                   | 697.83 |
| 'SLC25A14(Mitochondrial Inner membrane)'               | 696.50 |
| 'AMP/ATP ratio(cytosol)'                               | 692.17 |
| 'H2O (cytosol)'                                        | 691.17 |
| '(R)-2-hydroxyglutarate(Mitochondrial Inner membrane)' | 690.33 |
| 'ADHFE1(Mitochondrial Inner membrane)'                 | 690.17 |
| 'L-Dopa(cytosol)'                                      | 689.33 |
| 'PINK1:PARK2(Mitochondrial outer membrane)'            | 689.17 |
| 'beta-D-Glucose 6-phosphate(cytosol)'                  | 688.50 |
| 'shuttling factors(cytosol)'                           | 688.33 |
| 'diffusion(cytosol)'                                   | 687.17 |
| 'PTGS1(cytosol)'                                       | 685.67 |
| 'UPS(cytosol)'                                         | 685.50 |

|                                                               |        |
|---------------------------------------------------------------|--------|
| 'Maturing Phagopore(cytosol)'                                 | 684.50 |
| 'Calcineurin B complex(cytosol)'                              | 684.17 |
| 'S-adenosylmethionine (cytosol)'                              | 684.17 |
| 'PTGS2(cytosol)'                                              | 684.17 |
| 'Isolation membrane (IM)(cytosol)'                            | 684.00 |
| 'membrane permeability(Mitochondrial Inner membrane)'         | 683.33 |
| 'Oxaloacetate (Mitochondrial Inner membrane)'                 | 682.17 |
| 'ASK1 signalsome(cytosol)'                                    | 681.00 |
| 'SNCA(Docked DA loaded synaptic vesicle)'                     | 679.83 |
| 'BAX(cytosol)'                                                | 679.33 |
| 'CAT(Mitochondrial Inner membrane)'                           | 677.33 |
| 'CREB1(Nucleus)'                                              | 675.50 |
| 'SNAP25 (misfolded)(cytosol)'                                 | 674.33 |
| 'FOF1-ATP synthase (complex V)(Mitochondrial Inner membrane)' | 673.17 |
| 'TP53(Nucleus)'                                               | 671.83 |
| 'DP-1:E2F1 complex(Nucleus)'                                  | 671.00 |
| '143B:phospho-BAD complex(cytosol)'                           | 671.00 |
| 'PARK7(Mitochondrial Inner membrane)'                         | 671.00 |
| '1-chloro-2,4-dinitrobenzene (cytosol)'                       | 670.83 |
| 'PC(Mitochondrial Inner membrane)'                            | 670.50 |
| 'CO2 (Mitochondrial Inner membrane)'                          | 669.17 |
| 'O2-(Mitochondrial outer membrane)'                           | 668.67 |
| 'Autophagy induction(cytosol)'                                | 667.83 |
| 'GALM(cytosol)'                                               | 667.50 |
| 'PGAM4(cytosol)'                                              | 667.33 |
| 'PRDX4(Mitochondrial Inner membrane)'                         | 666.50 |
| 'Mitochondrial dysfunction(Mitochondrial Inner membrane)'     | 663.83 |
| 'GPX4(Mitochondrial Inner membrane)'                          | 663.83 |
| 'GPX1(Mitochondrial Inner membrane)'                          | 663.83 |
| 'PRDX1(Mitochondrial Inner membrane)'                         | 663.83 |
| 'PRDX2(Mitochondrial Inner membrane)'                         | 663.83 |
| 'PRDX3(Mitochondrial Inner membrane)'                         | 663.83 |
| 'PRDX5(Mitochondrial Inner membrane)'                         | 663.83 |
| 'DECR1(Mitochondrial Inner membrane)'                         | 663.83 |

|                                                               |        |
|---------------------------------------------------------------|--------|
| 'D-Glucose 1-phosphate(cytosol)'                              | 662.50 |
| 'PGM1(cytosol)'                                               | 662.33 |
| 'PGK1(cytosol)'                                               | 662.33 |
| 'VIM (fragment 2-466)(cytosol)'                               | 661.50 |
| 'ATP-sensitive K+ channel(Mitochondrial Inner membrane)'      | 661.50 |
| 'SNCA (Ala53Thr)(cytosol)'                                    | 661.17 |
| 'SNCA (Ala30Pro)(cytosol)'                                    | 660.17 |
| 'Glycerone phosphate(cytosol)'                                | 659.83 |
| 'MAPK10(cytosol)'                                             | 659.17 |
| 'OXCT1(Mitochondrial Inner membrane)'                         | 659.17 |
| 'SMAC:XIAP:Caspase-7(cytosol)'                                | 658.67 |
| 'PAK2(cytosol)'                                               | 658.17 |
| 'MAPK9(cytosol)'                                              | 658.17 |
| 'PINK1(Mitochondrial outer membrane)'                         | 658.17 |
| 'Complex_br_(ubiquitin/E1)(cytosol)'                          | 657.67 |
| '2-trans-4-cis-decadienoyl-CoA(Mitochondrial Inner membrane)' | 656.50 |
| 'GSH(Mitochondrial Inner membrane)'                           | 656.17 |
| 'TXN(Mitochondrial Inner membrane)'                           | 655.17 |
| 'Octanoyl-CoA(Mitochondrial Inner membrane)'                  | 655.17 |
| 'mitochondria depolarization(Mitochondrial Inner membrane)'   | 654.33 |
| 'fumarate hydratase(Mitochondrial Inner membrane)'            | 653.83 |
| 'Tyrosine 3-monooxygenase (Fe2+ cofactor)(cytosol)'           | 653.17 |
| 'Oxidative stress(Mitochondrial Inner membrane)'              | 653.17 |
| 'FADH2(Mitochondrial Inner membrane)'                         | 652.00 |
| 'Phagophore(cytosol)'                                         | 648.17 |
| 'BCL2(cytosol)'                                               | 647.33 |
| 'BIM sequestered to dynein (DLC1)(cytosol)'                   | 646.83 |
| 'BMF sequestered to dynein (DLC2)(cytosol)'                   | 646.83 |
| 'Lysosome(Lysosome)'                                          | 646.83 |
| 'SNAP25(cytosol)'                                             | 646.83 |
| 'DFFB(Nucleus)'                                               | 646.83 |
| 'MFN1(Mitochondrial outer membrane)'                          | 646.83 |
| 'MFN2(Mitochondrial outer membrane)'                          | 646.83 |
| 'HSP70(cytosol)'                                              | 646.83 |

|                                                                    |        |
|--------------------------------------------------------------------|--------|
| 'Acetaldehyde(cytosol)'                                            | 646.83 |
| 'Acetate(cytosol)'                                                 | 646.83 |
| 'TPI1(cytosol)'                                                    | 646.50 |
| 'ACADS(Mitochondrial Inner membrane)'                              | 646.50 |
| 'PPARGC1A(Nucleus)'                                                | 646.33 |
| 'PPARGC1A(Nucleus)'                                                | 646.17 |
| 'BAX(Mitochondrial outer membrane)'                                | 646.00 |
| 'Calorie Restriction(Nucleus)'                                     | 645.33 |
| 'Arachidonic acid(cytosol)'                                        | 644.33 |
| 'SOD1(cytosol)'                                                    | 643.33 |
| 'ROS(microglia)'                                                   | 642.83 |
| 'ROS(astrocyte)'                                                   | 641.83 |
| 'BAD(cytosol)'                                                     | 641.50 |
| 'ADH1A(cytosol)'                                                   | 641.50 |
| 'SMAC:XIAP:Caspase-9(cytosol)'                                     | 639.83 |
| 'TECR(c26)'                                                        | 639.83 |
| 'trans-octadec-2-enoyl-CoA(cytosol)'                               | 639.17 |
| 'L2HGDH(Mitochondrial Inner membrane)'                             | 638.67 |
| 'ATG1 kinase complex(cytosol)'                                     | 638.33 |
| 'propionyl-CoA(Mitochondrial Inner membrane)'                      | 637.83 |
| 'propionyl-CoA carboxylase protomer(Mitochondrial Inner membrane)' | 636.83 |
| 'Intrinsic apoptosis(Mitochondrial Inner membrane)'                | 636.67 |
| 'FOXO1(cytosol)'                                                   | 636.33 |
| 'CO2(Mitochondrial Inner membrane)'                                | 635.67 |
| 'ALDH9A1(cytosol)'                                                 | 634.83 |
| 'ALDH1A1(cytosol)'                                                 | 634.50 |
| 'DDC dimer (cytosol)'                                              | 634.17 |
| 'SLC6A3(cytosol)'                                                  | 633.50 |
| 'misfolded protein(cytosol)'                                       | 633.17 |
| 'Na+ (default)'                                                    | 632.50 |
| 'mitochondrial pyruvate carrier(Mitochondrial outer membrane)'     | 632.00 |
| 'unidentified caspase acting on Occludin(cytosol)'                 | 631.17 |
| 'Dopamine(default)'                                                | 630.67 |
| 'NF-kB:IkB(cytosol)'                                               | 627.67 |

|                                                                    |        |
|--------------------------------------------------------------------|--------|
| 'Rab3:RIM(cytosol)'                                                | 627.50 |
| 'E2(cytosol)'                                                      | 626.83 |
| 'misfolded SNCA(default)'                                          | 626.17 |
| 'Tetrahydrobiopterin (cytosol)'                                    | 625.83 |
| 'absorptive endocytosis(cytosol)'                                  | 624.83 |
| 'tetrodotoxin(cytosol)'                                            | 624.50 |
| 'Tyrosine 3-monooxygenase (Fe2+ cofactor)(cytosol)'                | 624.00 |
| 'L-Tyrosine (cytosol)'                                             | 624.00 |
| 'Oxygen (cytosol)'                                                 | 624.00 |
| 'pharmacological stimulations of synaptic activity(cytosol)'       | 623.33 |
| 'AMPA receptors containing GluR2 (homomers)(cytosol)'              | 621.17 |
| 'alpha cynuclein(microglia)'                                       | 619.67 |
| 'PRDX4(cytosol)'                                                   | 617.00 |
| 'caspase-3(cytosol)'                                               | 616.83 |
| 'caspase-6(Nucleus)'                                               | 616.83 |
| '(S)-3-Hydroxy-3-methylglutaryl-CoA(Mitochondrial Inner membrane)' | 616.67 |
| 'GSR(Mitochondrial Inner membrane)'                                | 616.50 |
| 'TXNRD2(Mitochondrial Inner membrane)'                             | 615.50 |
| 'KCl-induced depolarization(cytosol)'                              | 615.00 |
| 'BCAP31(ER)'                                                       | 614.50 |
| 'PRDX5(cytosol)'                                                   | 614.17 |
| 'PRDX3(cytosol)'                                                   | 614.17 |
| 'PRDX2(cytosol)'                                                   | 614.17 |
| 'PRDX1(cytosol)'                                                   | 614.17 |
| 'GPX4(cytosol)'                                                    | 614.17 |
| 'GPX1(cytosol)'                                                    | 614.17 |
| '3-hydroxyacyl-CoA dehydratase(c26)'                               | 614.17 |
| 'ATP(cytosol)'                                                     | 613.50 |
| 'Electron Leakage at Complex III(Mitochondrial Inner membrane)'    | 612.50 |
| 'PAK2(cytosol)'                                                    | 612.50 |
| 'Electron Leakage at Complex I(Mitochondrial Inner membrane)'      | 611.50 |
| '3-hydroxyoctadecanoyl-CoA(cytosol)'                               | 611.50 |
| 'phagocytosis(microglia)'                                          | 607.50 |
| 'MAPK14(cytosol)'                                                  | 607.17 |



|                                                                                |        |
|--------------------------------------------------------------------------------|--------|
| 'Citrate Synthase Holoenzyme(Mitochondrial Inner membrane)'                    | 606.17 |
| 'RasGRF(cytosol)'                                                              | 604.50 |
| 'GSSG(Mitochondrial Inner membrane)'                                           | 603.50 |
| 'tBID:BAX(cytosol)'                                                            | 603.50 |
| 'SLC25A1(Mitochondrial Inner membrane)'                                        | 602.83 |
| 'Mg++ (Mitochondrial Inner membrane)'                                          | 602.67 |
| 'TXN(Mitochondrial Inner membrane)'                                            | 602.50 |
| 'PDP2 complex(Mitochondrial Inner membrane)'                                   | 600.83 |
| 'PDP1 complex(Mitochondrial Inner membrane)'                                   | 600.83 |
| 'BAK1(Mitochondrial outer membrane)'                                           | 599.67 |
| 'E2(cytosol)'                                                                  | 599.50 |
| 'TNFR(cytosol)'                                                                | 598.17 |
| 'ACO2(Mitochondrial Inner membrane)'                                           | 597.83 |
| '14-3-3 sigma:Bax(cytosol)'                                                    | 597.33 |
| 'IL-1R(cytosol)'                                                               | 597.17 |
| 'anchored proteasome(cytosol)'                                                 | 596.83 |
| 'GSH(cytosol)'                                                                 | 596.50 |
| 'paraquat(cytosol)'                                                            | 596.33 |
| '14-3-3 zeta:Bax(cytosol)'                                                     | 596.17 |
| 'TXN(cytosol)'                                                                 | 596.00 |
| 'succinate semialdehyde(Mitochondrial Inner membrane)'                         | 595.50 |
| 'DCI(Mitochondrial Inner membrane)'                                            | 595.17 |
| 'Thioredoxin:ASK1(cytosol)'                                                    | 594.17 |
| 'phosphohrylated pyruvate dehydrogenase complex(Mitochondrial Inner membrane)' | 593.17 |
| 'Calcinuerin(cytosol)'                                                         | 592.33 |
| 'tBID(Mitochondrial outer membrane)'                                           | 591.67 |
| 'Citrate(Mitochondrial Inner membrane)'                                        | 591.50 |
| 'Caspase-7(cytosol)'                                                           | 590.00 |
| 'Electron Leakage at Complex III(Mitochondrial outer membrane)'                | 589.17 |
| 'VCP (R115H)(cytosol)'                                                         | 589.17 |
| 'VCP (mutated)(cytosol)'                                                       | 588.83 |
| 'DFF45:DFF40 complex(Nucleus)'                                                 | 588.67 |
| 'actin(cytosol)'                                                               | 588.33 |
| 'Complex_br_(ubiquitin/E1)(cytosol)'                                           | 588.00 |

|                                                   |        |
|---------------------------------------------------|--------|
| 'LRRK2(cytosol)'                                  | 587.83 |
| 'HMG CoA(Mitochondrial Inner membrane)'           | 587.83 |
| 'CAMKK2(cytosol)'                                 | 586.33 |
| 'UBL-acyl adenylate intermediate(cytosol)'        | 585.33 |
| 'STK11 (cytosol)'                                 | 585.33 |
| 'NSF:NAPA(cytosol)'                               | 584.17 |
| 'Acetate(Mitochondrial Inner membrane)'           | 584.00 |
| '3-Oxodecanoyl-CoA(Mitochondrial Inner membrane)' | 583.50 |
| 'tBID(cytosol)'                                   | 582.83 |
| 'SNARE complex(cytosol)'                          | 579.50 |
| 'chaperones(cytosol)'                             | 579.33 |
| 'Protein misfolding(default)'                     | 579.33 |
| 'DNM1L(cytosol)'                                  | 579.00 |
| 'Neuroinflammation(default)'                      | 578.67 |
| 'E4(cytosol)'                                     | 578.33 |
| 'HSD17B12(c26)'                                   | 578.33 |
| 'MICU1(Mitochondrial Inner membrane)'             | 578.00 |
| 'MAPK13(cytosol)'                                 | 578.00 |
| 'Failure of protein quality control(default)'     | 578.00 |
| 'PGG2(cytosol)'                                   | 577.83 |
| 'MAPK12(cytosol)'                                 | 577.67 |
| 'CACNA1D(cytosol)'                                | 577.33 |
| 'MAPK11(cytosol)'                                 | 577.33 |
| 'Misfolded protein propagation(default)'          | 577.33 |
| 'Ca2+(Mitochondrial outer membrane)'              | 577.00 |
| 'GSK3B(cytosol)'                                  | 577.00 |
| 'Ras:GTP(cytosol)'                                | 576.83 |
| 'Autolysosome(cytosol)'                           | 576.83 |
| 'AMPA receptor ligand complex(cytosol)'           | 576.67 |
| '3-oxooctadecanoyl-CoA(cytosol)'                  | 576.67 |
| 'Mitochondrial dysfunction(default)'              | 576.67 |
| 'LC3:VDAC1:HDAC6:p62(cytosol)'                    | 576.50 |
| 'FBP1(cytosol)'                                   | 576.00 |
| 'CLSPN(Nucleus)'                                  | 575.50 |

|                                                        |        |
|--------------------------------------------------------|--------|
| 'HPGDS(cytosol)'                                       | 575.33 |
| '4-cis-decenoyl-CoA(Mitochondrial Inner membrane)'     | 575.17 |
| 'PTGDS(cytosol)'                                       | 575.00 |
| 'MPTP(cytosol)'                                        | 574.33 |
| 'PTGES3(cytosol)'                                      | 574.33 |
| 'MAPT(cytosol)'                                        | 574.33 |
| 'MAP1LC3A (LC3-I)(cytosol)'                            | 574.00 |
| 'PE(cytosol)'                                          | 574.00 |
| 'PTGES(cytosol)'                                       | 574.00 |
| 'PTGES2(cytosol)'                                      | 573.67 |
| 'tublin beta(cytosol)'                                 | 573.33 |
| 'Apaf-1:Cytochrome C(cytosol)'                         | 573.00 |
| 'TXNRD1(cytosol)'                                      | 573.00 |
| 'PGF2 alpha(cytosol)'                                  | 572.67 |
| 'TXNRD2(cytosol)'                                      | 572.33 |
| 'GSR(cytosol)'                                         | 572.33 |
| 'SNCA (fibril)(cytosol)'                               | 572.33 |
| 'L-Palmitoylcarnitine(Mitochondrial Inner membrane)'   | 571.83 |
| 'SOD2(Mitochondrial Inner membrane)'                   | 571.67 |
| 'PGD2(cytosol)'                                        | 571.33 |
| 'DBNL(cytosol)'                                        | 571.17 |
| 'VAMP2(DA loaded synaptic vesicle)'                    | 571.00 |
| 'GSN(cytosol)'                                         | 570.83 |
| 'CSP:Hsc70:SGT(Docked DA loaded synaptic vesicle)'     | 570.67 |
| 'Acetyl-CoA/CoA(Mitochondrial Inner membrane)'         | 570.50 |
| 'BMX(cytosol)'                                         | 570.50 |
| 'MST4(cytosol)'                                        | 570.17 |
| '3-Oxotetradecanoyl-CoA(Mitochondrial Inner membrane)' | 570.17 |
| 'Calmodulin:CaMK IV(Nucleus)'                          | 569.83 |
| 'EIF4EBP1(cytosol)'                                    | 569.67 |
| 'PGE2(cytosol)'                                        | 569.67 |
| 'NADH/NAD+(Mitochondrial Inner membrane)'              | 569.50 |
| 'SPTAN1(cytosol)'                                      | 569.50 |
| 'CREB:CBP(Nucleus)'                                    | 569.33 |

|                                                                      |        |
|----------------------------------------------------------------------|--------|
| 'PRKCZ(cytosol)'                                                     | 569.33 |
| 'NMDA receptor complex(cytosol)'                                     | 569.17 |
| '3-Oxopalmitoyl-CoA(Mitochondrial Inner membrane)'                   | 568.83 |
| '3-Oxododecanoyl-CoA(Mitochondrial Inner membrane)'                  | 568.83 |
| 'CREB:TORC1(Nucleus)'                                                | 568.67 |
| 'BMF(Mitochondrial outer membrane)'                                  | 568.67 |
| 'ACIN1(cytosol)'                                                     | 568.50 |
| 'tBID:BAK(Mitochondrial outer membrane)'                             | 568.33 |
| 'STK25(cytosol)'                                                     | 568.33 |
| '3-Oxohexanoyl-CoA(Mitochondrial Inner membrane)'                    | 568.17 |
| 'CREB:TORC2(Nucleus)'                                                | 567.67 |
| 'STK24(cytosol)'                                                     | 567.67 |
| 'ADD1(cytosol)'                                                      | 567.50 |
| 'mtDNA deletion(Mitochondrial Inner membrane)'                       | 567.33 |
| 's5073(cytosol)'                                                     | 567.33 |
| 'Succinate dehydrogenase (complex II)(Mitochondrial Inner membrane)' | 567.17 |
| 'membrane depolarization(cytosol)'                                   | 567.17 |
| 'STK3(cytosol)'                                                      | 567.00 |
| 'SNARE complex(Docked DA loaded synaptic vesicle)'                   | 566.67 |
| 'PRKCD(cytosol)'                                                     | 566.50 |
| 'TAOK3(cytosol)'                                                     | 566.33 |
| 'Caspase-8(ER)'                                                      | 566.17 |
| 'mtDNA mutations(Mitochondrial Inner membrane)'                      | 566.17 |
| 'PINK1(Mitochondrial outer membrane)'                                | 566.00 |
| 'tublin beta(cytosol)'                                               | 566.00 |
| 'PRKCQ(cytosol)'                                                     | 565.50 |
| 'RDX(cytosol)'                                                       | 565.33 |
| '3-Oxo-octanoyl-CoA(Mitochondrial Inner membrane)'                   | 565.17 |
| 'CCCP(cytosol)'                                                      | 565.00 |
| 'EZR(cytosol)'                                                       | 565.00 |
| 'EIF4EBP1(cytosol)'                                                  | 565.00 |
| 'UBA1(cytosol)'                                                      | 564.17 |
| 'MSN(cytosol)'                                                       | 564.00 |
| 'FNTA(cytosol)'                                                      | 563.83 |

|                                           |        |
|-------------------------------------------|--------|
| 'LRRK2(cytosol)'                          | 563.67 |
| 'STK25(cytosol)'                          | 563.00 |
| 'ROCK1(cytosol)'                          | 562.83 |
| 'TSC2(cytosol)'                           | 562.33 |
| 'BIRC2(cytosol)'                          | 562.17 |
| 'STK24(cytosol)'                          | 562.00 |
| 'Histone H1 bound chromatin DNA(Nucleus)' | 561.67 |
| 'Amino Acids(cytosol)'                    | 561.67 |
| 'G6PC(cytosol)'                           | 561.17 |
| 'H2O2(Mitochondrial outer membrane)'      | 561.00 |
| 'STK3(cytosol)'                           | 561.00 |
| 'GAS2(cytosol)'                           | 560.50 |
| 'TAOK3(cytosol)'                          | 560.00 |
| 'oxygen(Mitochondrial Inner membrane)'    | 559.50 |
| 'RDX(cytosol)'                            | 558.67 |
| 'PTGS2(Nucleus)'                          | 558.33 |
| 'SATB1(Nucleus)'                          | 557.50 |
| 'HSPA8(cytosol)'                          | 557.50 |
| 'K+(Mitochondrial outer membrane)'        | 557.33 |
| 'EZR(cytosol)'                            | 557.33 |
| 'Atg complex(cytosol)'                    | 557.00 |
| 'LMNB1(Nucleus)'                          | 556.83 |
| 'MSN(cytosol)'                            | 556.67 |
| 'classic PI3K complex(cytosol)'           | 556.50 |
| 'LMNA(Nucleus)'                           | 556.50 |
| 'NOS(Mitochondrial Inner membrane)'       | 555.83 |
| 'Bcl-2:BH-3 only proteins(cytosol)'       | 555.67 |
| 'GRIN2B(cytosol)'                         | 555.67 |
| 'BAD(cytosol)'                            | 555.50 |
| 'LAMP2(Lysosome)'                         | 555.50 |
| 'CSP:Hsc70:SGT(cytosol)'                  | 555.50 |
| 'OCLN(cytosol)'                           | 555.17 |
| 'ACADVL(Mitochondrial Inner membrane)'    | 555.17 |
| 'GRIN2A(cytosol)'                         | 555.00 |

|                                                         |        |
|---------------------------------------------------------|--------|
| 'UBE4A:VCP(cytosol)'                                    | 554.33 |
| 'palmitoyl-CoA(Mitochondrial Inner membrane)'           | 554.00 |
| 'DSG3(cytosol)'                                         | 553.83 |
| 'CAMK2A(cytosol)'                                       | 553.67 |
| 'unidentified caspase acting on Plakophilin 1(cytosol)' | 553.00 |
| 'SNCA(cytosol)'                                         | 553.00 |
| 'unidentified caspase acting on ZO-1(cytosol)'          | 552.67 |
| 'GSSG(cytosol)'                                         | 552.50 |
| 'ATG1 kinase complex(cytosol)'                          | 552.33 |
| 'unidentified caspase acting on Desmoplakin(cytosol)'   | 552.33 |
| 'myristoyl-CoA(Mitochondrial Inner membrane)'           | 552.17 |
| 'Decanoyl-CoA(Mitochondrial Inner membrane)'            | 552.17 |
| 'Lauroyl-CoA(Mitochondrial Inner membrane)'             | 552.17 |
| 'Name unidentified caspase acting on ZO-2 (cytosol)'    | 552.00 |
| 'stearoyl-CoA(cytosol)'                                 | 552.00 |
| 'DSG1(cytosol)'                                         | 551.50 |
| 'MTOR(cytosol)'                                         | 551.50 |
| 'Butanoyl-CoA(Mitochondrial Inner membrane)'            | 551.33 |
| 'TXN(cytosol)'                                          | 551.17 |
| 'ACC2(cytosol)'                                         | 551.00 |
| 'Carnitine(Mitochondrial outer membrane)'               | 550.67 |
| 'Oxaloacetate(cytosol)'                                 | 550.33 |
| 'Pi(cytosol)'                                           | 549.67 |
| 'Carnitine(Mitochondrial Inner membrane)'               | 549.00 |
| '3-oxocerotoyl-CoA(cytosol)'                            | 549.00 |
| '3-oxobehenoyl-CoA(cytosol)'                            | 548.33 |
| '(S)-Malate(Mitochondrial Inner membrane)'              | 547.67 |
| '3-oxo-(7-10-13-16)-docosatetraenoyl-CoA(cytosol)'      | 547.67 |
| 'CYCS(Mitochondrial Inner membrane)'                    | 547.00 |
| 'TAG(cytosol)'                                          | 547.00 |
| 'PINK1(cytosol)'                                        | 546.50 |
| 'CO2(cytosol)'                                          | 546.33 |
| 'PARK2:HSP70(cytosol)'                                  | 545.67 |
| 'TOM complex(Mitochondrial outer membrane)'             | 545.33 |

|                                                      |        |
|------------------------------------------------------|--------|
| 'PARK2:UbcH7(cytosol)'                               | 545.00 |
| 'SLC25A20(Mitochondrial Inner membrane)'             | 544.50 |
| 'PARK2(cytosol)'                                     | 544.33 |
| 'TORC2:14-3-3(cytosol)'                              | 543.50 |
| 'Arachidonic Acid(cytosol)'                          | 543.00 |
| 'BTRC(cytosol)'                                      | 542.67 |
| 'G3P(Mitochondrial Inner membrane)'                  | 542.50 |
| 's4933(cytosol)'                                     | 542.33 |
| 'NF-_kappa_B:l_kappa_B(cytosol)'                     | 541.67 |
| 'GPD2(Mitochondrial Inner membrane)'                 | 541.50 |
| 'Free Fatty Acid(Mitochondrial outer membrane)'      | 541.33 |
| 'ubiquitin-interacting vesicle protein:VCP(cytosol)' | 541.33 |
| 'DOPAC(cytosol)'                                     | 540.67 |
| 'clathrin:VCP(cytosol)'                              | 540.67 |
| 'XIAP:Caspase-3(cytosol)'                            | 540.33 |
| 'HV Aldehyde(cytosol)'                               | 540.33 |
| 'Purine Nucleotide(Mitochondrial outer membrane)'    | 540.33 |
| 'ATF3(Nucleus)'                                      | 540.00 |
| 'proteasome:VCP(cytosol)'                            | 540.00 |
| 'VDAC1:HDAC6:p62(cytosol)'                           | 539.83 |
| 'BTG2(Nucleus)'                                      | 539.67 |
| 'Starvation(cytosol)'                                | 539.50 |
| 'ZNF746(Nucleus)'                                    | 539.33 |
| 'GADD45B(Nucleus)'                                   | 539.33 |
| 'ubiquitin-binding adaptor:VCP(cytosol)'             | 539.33 |
| 'K63-polyubiquitinated midfoded DJ-1(cytosol)'       | 539.00 |
| 'TIM Complex(Mitochondrial Inner membrane)'          | 539.00 |
| 'PINK1:MAPK14(Mitochondrial outer membrane)'         | 539.00 |
| 'Lewy Body(Lewy Body)'                               | 539.00 |
| 's1275(Nucleus)'                                     | 539.00 |
| 's1276(Nucleus)'                                     | 539.00 |
| 'geldanamycin(cytosol)'                              | 539.00 |
| 'NDUFA8(Nucleus)'                                    | 539.00 |
| 'NDUFAB1(Nucleus)'                                   | 539.00 |

|                      |        |
|----------------------|--------|
| 'NDUFB3(Nucleus)'    | 539.00 |
| 'SLC25A27(Nucleus)'  | 539.00 |
| 'SLC25A14(Nucleus)'  | 539.00 |
| 'NDUFB6(Nucleus)'    | 539.00 |
| 'NDUFB5(Nucleus)'    | 539.00 |
| 'COX7C(Nucleus)'     | 539.00 |
| 'COX7B(Nucleus)'     | 539.00 |
| 'COX7A2L(Nucleus)'   | 539.00 |
| 'ATP5A1(Nucleus)'    | 539.00 |
| 'ATP5C1(Nucleus)'    | 539.00 |
| 'ATP5D(Nucleus)'     | 539.00 |
| 'ATP5L(Nucleus)'     | 539.00 |
| 'ATP5O(Nucleus)'     | 539.00 |
| 'COX5B(Nucleus)'     | 539.00 |
| 'COX6A1(Nucleus)'    | 539.00 |
| 'COX7A1(Nucleus)'    | 539.00 |
| 'COX7A2(Nucleus)'    | 539.00 |
| 'NDUFC1(Nucleus)'    | 539.00 |
| 'NDUFS3(Nucleus)'    | 539.00 |
| 'NDUFS5(Nucleus)'    | 539.00 |
| 'SDHA(Nucleus)'      | 539.00 |
| 'SDHB(Nucleus)'      | 539.00 |
| 'SLC25A4(Nucleus)'   | 539.00 |
| 'SLC25A5(Nucleus)'   | 539.00 |
| 'UQCRB(Nucleus)'     | 539.00 |
| 'UQCRC1(Nucleus)'    | 539.00 |
| 'Bdnf(Nucleus)'      | 539.00 |
| 'Serpinb 2(Nucleus)' | 539.00 |
| 'Nr4a1(Nucleus)'     | 539.00 |
| 'Npas4(Nucleus)'     | 539.00 |
| 'INHBA(Nucleus)'     | 539.00 |
| 'GADD45G(Nucleus)'   | 539.00 |
| 'GADD45B(Nucleus)'   | 539.00 |
| 'BCL6(Nucleus)'      | 539.00 |



|                                                        |        |
|--------------------------------------------------------|--------|
| 'BTG2(Nucleus)'                                        | 539.00 |
| 'ATF3(Nucleus)'                                        | 539.00 |
| 'MAP2K3(cytosol)'                                      | 539.00 |
| 'MAP2K6(cytosol)'                                      | 539.00 |
| 'XRCC6(cytosol)'                                       | 539.00 |
| 'OPA1(Mitochondrial Inner membrane)'                   | 539.00 |
| 'ZNF746(cytosol)'                                      | 539.00 |
| 'HTRA2(cytosol)'                                       | 539.00 |
| 'RPS6KA1(cytosol)'                                     | 539.00 |
| 'RPS6KA2(cytosol)'                                     | 539.00 |
| 'RPS6KA6(cytosol)'                                     | 539.00 |
| 'RPS6KA3(cytosol)'                                     | 539.00 |
| 'dynein(cytosol)'                                      | 539.00 |
| 'PARK7(cytosol)'                                       | 539.00 |
| 'DNM1L(Mitochondrial outer membrane)'                  | 539.00 |
| 'misfolded transmembrane ER protein(cytosol)'          | 539.00 |
| 'SIRT3(Nucleus)'                                       | 539.00 |
| 'GADD45G(Nucleus)'                                     | 539.00 |
| '3-O-Methyldopamine(cytosol)'                          | 539.00 |
| 'VCP:UBE4B(cytosol)'                                   | 539.00 |
| 'INHBA(Nucleus)'                                       | 538.67 |
| 'ataxin 3:VCP(cytosol)'                                | 538.67 |
| 'MAP1LC3A(cytosol)'                                    | 538.50 |
| 'PPARGC1A(Nucleus)'                                    | 538.33 |
| 'BCL6(Nucleus)'                                        | 538.33 |
| 'Npas4(Nucleus)'                                       | 538.00 |
| 'Jacob:caldendrin(cytosol)'                            | 538.00 |
| 'YWHAB(cytosol)'                                       | 537.83 |
| 'Carbon fixation in photosynthetic organisms(cytosol)' | 537.67 |
| 'Nr4a1(Nucleus)'                                       | 537.67 |
| 'Serpinb 2(Nucleus)'                                   | 537.33 |
| 'UQCRC1(Nucleus)'                                      | 537.00 |
| 'LPIN3(c26)'                                           | 537.00 |
| 'UQCRB(Nucleus)'                                       | 536.67 |

|                                            |        |
|--------------------------------------------|--------|
| 'PTGS2(Nucleus)'                           | 536.50 |
| 'SLC25A5(Nucleus)'                         | 536.33 |
| 'CDH1(cytosol)'                            | 536.17 |
| 'SLC25A4(Nucleus)'                         | 536.00 |
| 'SDHB(Nucleus)'                            | 535.67 |
| 'NO(default)'                              | 535.67 |
| 'LPIN1(c26)'                               | 535.67 |
| 'LPIN2(c26)'                               | 535.67 |
| 'NF-kB(cytosol)'                           | 535.33 |
| 'PIK3R4(cytosol)'                          | 535.33 |
| 'SDHA(Nucleus)'                            | 535.33 |
| 'NDUFS5(Nucleus)'                          | 535.00 |
| 'PGE2(default)'                            | 535.00 |
| '1-2-diacyl-glycerol 3-phosphate(cytosol)' | 535.00 |
| 'NDUFS3(Nucleus)'                          | 534.67 |
| 'AKT1 (cytosol)'                           | 534.50 |
| 'NDUFC1(Nucleus)'                          | 534.33 |
| 'OH-(cytosol)'                             | 534.33 |
| 'PLEC(cytosol)'                            | 534.17 |
| 'PIK3C3(cytosol)'                          | 534.00 |
| 'COX7A2(Nucleus)'                          | 534.00 |
| 'COX7A1(Nucleus)'                          | 533.67 |
| 'COX6A1(Nucleus)'                          | 533.33 |
| 'Citrate(Mitochondrial outer membrane)'    | 533.33 |
| 'COX5B(Nucleus)'                           | 533.00 |
| 'Ethanol(cytosol)'                         | 532.83 |
| 'ATP5O(Nucleus)'                           | 532.67 |
| '(S)-Malate(Mitochondrial outer membrane)' | 532.67 |
| 'ATP5L(Nucleus)'                           | 532.33 |
| 'ATP5D(Nucleus)'                           | 532.00 |
| 'NADP+(cytosol)'                           | 532.00 |
| 'ATP5C1(Nucleus)'                          | 531.67 |
| 'ATP5A1(Nucleus)'                          | 531.33 |
| 'PPi(cytosol)'                             | 531.33 |

|                                                   |        |
|---------------------------------------------------|--------|
| 'SIRT3(Nucleus)'                                  | 531.17 |
| 'ESRRA(Nucleus)'                                  | 531.17 |
| 'HTRA2(Mitochondrial outer membrane)'             | 531.17 |
| 'misfolded PARK7(cytosol)'                        | 531.17 |
| 'UBE4B(cytosol)'                                  | 531.17 |
| 'MUL1(Mitochondrial outer membrane)'              | 531.17 |
| 'misfolded transmembrane ER protein(ER)'          | 531.17 |
| 'SLC25A14(Nucleus)'                               | 531.00 |
| 'CTNNB1(cytosol)'                                 | 530.83 |
| 'SLC25A27(Nucleus)'                               | 530.67 |
| '4-hydroxybutyrate(Mitochondrial Inner membrane)' | 530.50 |
| 'NDUFB6(Nucleus)'                                 | 530.33 |
| 'FAD2(Mitochondrial Inner membrane)'              | 530.33 |
| 'NDUFB5(Nucleus)'                                 | 530.00 |
| 'NDUFB3(Nucleus)'                                 | 529.67 |
| 'Pi(Mitochondrial Inner membrane)'                | 529.67 |
| 'high concentration of ?-nuclein(cytosol)'        | 529.50 |
| 'H2O(cytosol)'                                    | 529.50 |
| 'NDUFAB1(Nucleus)'                                | 529.33 |
| 'VDAC1(Mitochondrial outer membrane)'             | 529.00 |
| 'NDUFA8(Nucleus)'                                 | 529.00 |
| 'DHAP(Mitochondrial Inner membrane)'              | 529.00 |
| 'COX7C(Nucleus)'                                  | 528.67 |
| 'COX7B(Nucleus)'                                  | 528.33 |
| 'Succinate(Mitochondrial Inner membrane)'         | 528.17 |
| 'COX7A2L(Nucleus)'                                | 528.00 |
| 'Glycine(cytosol)'                                | 528.00 |
| 'SQSTM1(cytosol)'                                 | 527.67 |
| 'HDAC6(cytosol)'                                  | 527.67 |
| 'XIAP(cytosol)'                                   | 527.67 |
| 'HSP40:HSP70(cytosol)'                            | 527.67 |
| 'HTRA2(cytosol)'                                  | 527.33 |
| 'L-Glutamate(cytosol)'                            | 527.33 |
| 'iNOS(astrocyte)'                                 | 527.00 |

|                                                                                     |        |
|-------------------------------------------------------------------------------------|--------|
| 'Doa10p(ER)'                                                                        | 526.67 |
| 'misfolded transmembrane ER protein(ER)'                                            | 526.67 |
| 'HTRA2(Mitochondrial outer membrane)'                                               | 526.67 |
| 'PARL(Mitochondrial outer membrane)'                                                | 526.67 |
| 'Acetyl-CoA (cytosol)'                                                              | 526.67 |
| 'FASL(astrocyte)'                                                                   | 526.33 |
| '5-hydroxytryptamine N-methyl conjugate(cytosol)'                                   | 526.00 |
| 'NF- $\kappa$ B: I $\kappa$ B(cytosol)'                                             | 525.67 |
| 'IL6(microglia)'                                                                    | 525.67 |
| 'NF-kB(cytosol)'                                                                    | 525.33 |
| '4a-hydroxytetrahydrobiopterin(cytosol)'                                            | 525.33 |
| 'ADP(cytosol)'                                                                      | 524.67 |
| 'Casein Kinase 2(cytosol)'                                                          | 524.33 |
| 'IKK complex(cytosol)'                                                              | 524.33 |
| 'PMPCA(Mitochondrial Inner membrane)'                                               | 524.00 |
| 'ADP(Mitochondrial outer membrane)'                                                 | 524.00 |
| 'PINK1(Mitochondrial Inner membrane)'                                               | 523.67 |
| 'PARL(Mitochondrial Inner membrane)'                                                | 523.33 |
| 'Orthophosphate (Mitochondrial Inner membrane)'                                     | 523.33 |
| 'NMDA receptor complex(cytosol)'                                                    | 523.00 |
| 'DIABLO(Mitochondrial outer membrane)'                                              | 522.83 |
| 'BAK1(Mitochondrial outer membrane)'                                                | 522.67 |
| 'ADP (Mitochondrial Inner membrane)'                                                | 522.67 |
| 'FUBP1(cytosol)'                                                                    | 522.33 |
| 'OH-(Mitochondrial Inner membrane)'                                                 | 522.00 |
| 'H <sub>sub</sub> 2 <sub>end</sub> sub <sub>O</sub> (Mitochondrial Inner membrane)' | 521.33 |
| 'NH3 (cytosol)'                                                                     | 520.67 |
| '5-Hydroxyindole acetic acid(Mitochondrial Inner membrane)'                         | 520.00 |
| 'GPR37(cytosol)'                                                                    | 519.67 |
| 'H2O2 (cytosol)'                                                                    | 519.33 |
| 'PKAc(cytosol)'                                                                     | 519.00 |
| 'NFKB1(cytosol)'                                                                    | 518.83 |
| 'S-adenosylhomocysteine (cytosol)'                                                  | 518.67 |
| 'RANBP2(cytosol)'                                                                   | 518.33 |

|                                                  |        |
|--------------------------------------------------|--------|
| 'SLC6A3(cytosol)'                                | 518.00 |
| 'GTP(Mitochondrial Inner membrane)'              | 518.00 |
| 'SIM2(cytosol)'                                  | 517.67 |
| 'AIMP2(cytosol)'                                 | 517.33 |
| 'CO2 (cytosol)'                                  | 517.33 |
| 'IKK complex(cytosol)'                           | 517.00 |
| 'GlcNAC(cytosol)'                                | 517.00 |
| 'cyclin-E(cytosol)'                              | 517.00 |
| 'NFKBIA(cytosol)'                                | 517.00 |
| 'RELA(cytosol)'                                  | 517.00 |
| '?-tubulin(cytosol)'                             | 516.67 |
| 'WGA(cytosol)'                                   | 516.33 |
| '?-tublin(cytosol)'                              | 516.33 |
| 'DOPET(cytosol)'                                 | 516.33 |
| 'Sep-05(cytosol)'                                | 516.00 |
| 'Protein target(cytosol)'                        | 515.67 |
| 'HVA(cytosol)'                                   | 515.67 |
| 'mTOR complex 1 (mTORC1)(cytosol)'               | 515.50 |
| 'SNCAIP(cytosol)'                                | 515.33 |
| 'UbcH7(cytosol)'                                 | 515.00 |
| 'AKAP150(cytosol)'                               | 514.67 |
| 'GRIP1(cytosol)'                                 | 514.33 |
| 'BAG1(cytosol)'                                  | 513.67 |
| 'CALM1(cytosol)'                                 | 513.33 |
| 'DNAJB2(cytosol)'                                | 513.33 |
| 'ATP (Mitochondrial Inner membrane)'             | 513.33 |
| 'DFF40 associated with chromatin(Nucleus)'       | 513.17 |
| 'STUB1(cytosol)'                                 | 513.00 |
| 'APC(cytosol)'                                   | 512.83 |
| 'ACADL(Mitochondrial Inner membrane)'            | 512.83 |
| 'ubiquitin-interactin vesicle proteins(cytosol)' | 512.67 |
| 'clathrin(cytosol)'                              | 512.33 |
| 'ubiquitin-binding adaptor(cytosol)'             | 512.00 |
| 'UBE4A(cytosol)'                                 | 511.67 |

|                                                                            |        |
|----------------------------------------------------------------------------|--------|
| 'CPT2(Mitochondrial Inner membrane)'                                       | 511.67 |
| 'Succinate dehydrogenase (complex II)(Mitochondrial Inner membrane)'       | 511.50 |
| 'PDK2 (Mitochondrial Inner membrane)'                                      | 511.17 |
| 'PDK4 (Mitochondrial Inner membrane)'                                      | 511.17 |
| 'PDK1 (Mitochondrial Inner membrane)'                                      | 511.17 |
| 'PDK3 (Mitochondrial Inner membrane)'                                      | 511.17 |
| 'CPT1B(Mitochondrial Inner membrane)'                                      | 511.00 |
| 'CPT1A(Mitochondrial Inner membrane)'                                      | 511.00 |
| 'ATXN3 (polyQ)(cytosol)'                                                   | 510.67 |
| 'ATXN3(cytosol)'                                                           | 510.33 |
| 'caspase-6(cytosol)'                                                       | 509.50 |
| 'caspase-7(Nucleus)'                                                       | 509.17 |
| 'Acetylated NADH-Q oxireductase (complex I)(Mitochondrial Inner membrane)' | 509.17 |
| 'CABP1(cytosol)'                                                           | 507.67 |
| 'RPS6KA3(cytosol)'                                                         | 504.67 |
| 'O2(Mitochondrial Inner membrane)'                                         | 504.50 |
| 'RPS6KA6(cytosol)'                                                         | 504.33 |
| 'RPS6KA2(cytosol)'                                                         | 504.00 |
| 'RPS6KA1(cytosol)'                                                         | 503.67 |
| 'ACSS2(cytosol)'                                                           | 502.67 |
| 'XIAP:Caspase-7(cytosol)'                                                  | 502.50 |
| 'GBA(Lysosome)'                                                            | 502.00 |
| 'ZNF746(cytosol)'                                                          | 501.67 |
| 'Orthophosphate(cytosol)'                                                  | 501.67 |
| 'FASL(default)'                                                            | 501.00 |
| 'XRCC6(cytosol)'                                                           | 500.00 |
| 'IL6(default)'                                                             | 500.00 |
| 'CASP8(cytosol)'                                                           | 499.67 |
| 'D2HGDH(Mitochondrial Inner membrane)'                                     | 499.33 |
| 'PAK2 (p34)(cytosol)'                                                      | 499.00 |
| 'MFN2(cytosol)'                                                            | 498.33 |
| 'Ras:GDP(cytosol)'                                                         | 497.67 |
| 'MFN1(cytosol)'                                                            | 497.67 |
| 'Zn2+(Mitochondrial Inner membrane)'                                       | 497.33 |

|                                                               |        |
|---------------------------------------------------------------|--------|
| 'Mn2+(Mitochondrial Inner membrane)'                          | 497.33 |
| 'Co2+(Mitochondrial Inner membrane)'                          | 497.33 |
| 'importin-?(Nucleus)'                                         | 496.00 |
| 'FUBP1(cytosol)'                                              | 495.33 |
| 'SYT11(cytosol)'                                              | 494.33 |
| 'XIAP:Caspase-9(cytosol)'                                     | 494.17 |
| 'APAF1(cytosol)'                                              | 493.67 |
| 'CYCS(cytosol)'                                               | 493.67 |
| 'SLC6A3(cytosol)'                                             | 493.67 |
| 'SIM2(cytosol)'                                               | 493.00 |
| 'AIMP2(cytosol)'                                              | 492.33 |
| 'RANBP2(cytosol)'                                             | 491.67 |
| 'cyclin-E(cytosol)'                                           | 491.00 |
| '?-tubulin(cytosol)'                                          | 490.33 |
| 'GPR37(cytosol)'                                              | 489.33 |
| 'Sep-05(cytosol)'                                             | 488.67 |
| '?-tublin(cytosol)'                                           | 488.00 |
| 'MUT dimer(Mitochondrial Inner membrane)'                     | 485.67 |
| 'NADPH oxidase(astrocyte)'                                    | 485.33 |
| 'O2(Mitochondrial outer membrane)'                            | 485.00 |
| 'SNCAIP(cytosol)'                                             | 484.67 |
| 'NADPH oxidase(microglia)'                                    | 484.33 |
| 'L-methylmalonyl-CoA(Mitochondrial Inner membrane)'           | 483.33 |
| 'misfolded protein(cytosol)'                                  | 482.67 |
| 'cis-cis-3-6-Dodecadienoyl-CoA(Mitochondrial Inner membrane)' | 480.33 |
| 'Hexanoyl-CoA(Mitochondrial Inner membrane)'                  | 480.17 |
| 'Jacob:importin alpha(Nucleus)'                               | 480.00 |
| 'CREBBP(Nucleus)'                                             | 478.00 |
| 'protein phosphatase 1(cytosol)'                              | 478.00 |
| 'ATF3(cytosol)'                                               | 477.33 |
| 'PKP1(cytosol)'                                               | 477.00 |
| 'CRTC2(cytosol)'                                              | 477.00 |
| 'BCL6(cytosol)'                                               | 476.67 |
| 'BTG2(cytosol)'                                               | 476.00 |

|                                                                     |        |
|---------------------------------------------------------------------|--------|
| 'CRTC1(Nucleus)'                                                    | 476.00 |
| 'TJP2(cytosol)'                                                     | 475.67 |
| 'GADD45B(cytosol)'                                                  | 475.33 |
| 'DSP(cytosol)'                                                      | 475.00 |
| 'GADD45G(cytosol)'                                                  | 474.67 |
| 'ACSS1(Mitochondrial Inner membrane)'                               | 474.50 |
| 'TJP1(cytosol)'                                                     | 474.33 |
| 'NR4A1(cytosol)'                                                    | 473.67 |
| 'NPAS4(cytosol)'                                                    | 473.00 |
| 'AKT1(cytosol)'                                                     | 472.67 |
| 'BCL2(Mitochondrial outer membrane)'                                | 472.33 |
| 'SERPINB2(cytosol)'                                                 | 472.33 |
| 'Acetylated isocitrate dehydrogenase(Mitochondrial Inner membrane)' | 472.00 |
| 'INHBA(cytosol)'                                                    | 471.67 |
| 'BBC3(cytosol)'                                                     | 471.00 |
| 'RPS6KA1(Nucleus)'                                                  | 471.00 |
| 'SLC25A5(Mitochondrial Inner membrane)'                             | 470.67 |
| 'SLC25A4(Mitochondrial Inner membrane)'                             | 470.33 |
| 'RPS6KA2(Nucleus)'                                                  | 470.33 |
| 'GLUD1(Mitochondrial Inner membrane)'                               | 469.83 |
| 'RPS6KA3(Nucleus)'                                                  | 469.67 |
| 'RPS6KA6(Nucleus)'                                                  | 469.00 |
| 'SOD1(Mitochondrial outer membrane)'                                | 468.83 |
| 'SAP-97(cytosol)'                                                   | 467.00 |
| 'GLUD1(Mitochondrial Inner membrane)'                               | 466.33 |
| 'ASK1 signalsome(cytosol)'                                          | 465.83 |
| 'VAMP2(cytosol)'                                                    | 465.67 |
| 'RIMS1(cytosol)'                                                    | 465.33 |
| 'Dopamine loaded synaptic vesicle(DA loaded synaptic vesicle)'      | 464.67 |
| 'Fumarate (Mitochondrial Inner membrane)'                           | 464.67 |
| 'CYCS(Nucleus)'                                                     | 464.50 |
| 'CYCS(Mitochondrial outer membrane)'                                | 464.17 |
| 'PAK2 (p34)(Nucleus)'                                               | 464.00 |
| 'VDAC1(Mitochondrial outer membrane)'                               | 463.67 |



|                                                       |        |
|-------------------------------------------------------|--------|
| 'DNM1L(Mitochondrial outer membrane)'                 | 463.33 |
| 'Caspase-2(cytosol)'                                  | 463.00 |
| 'SFN(cytosol)'                                        | 462.67 |
| 'YWHAZ(cytosol)'                                      | 462.00 |
| 'CPLX1(cytosol)'                                      | 460.83 |
| 'Crotonoyl-CoA(Mitochondrial Inner membrane)'         | 460.83 |
| 'SYT11(cytosol)'                                      | 460.67 |
| 'PRKACB(Nucleus)'                                     | 460.33 |
| 'DFFA (fragment 225-331)(Nucleus)'                    | 460.00 |
| 'Synapsin(cytosol)'                                   | 459.67 |
| 'DSG2(cytosol)'                                       | 459.67 |
| 'DFFA (fragment 1-117)(Nucleus)'                      | 459.33 |
| 'CaMKII:Calmodulin:Ca2(cytosol)'                      | 459.33 |
| 'PRKACG(Nucleus)'                                     | 459.00 |
| 'PRKACA(Nucleus)'                                     | 459.00 |
| 'CLSPN (fragment 1-1072)(Nucleus)'                    | 458.67 |
| 'DNM1L(cytosol)'                                      | 458.00 |
| 'DBNL (fragment 1-361)(cytosol)'                      | 457.67 |
| 'DBNL (fragment 362-431)(cytosol)'                    | 457.00 |
| 'HMGCS2(Mitochondrial Inner membrane)'                | 456.83 |
| 'GSN (fragment 27-403)(cytosol)'                      | 456.33 |
| 'BMF(cytosol)'                                        | 456.00 |
| 'GSN (fragment 404-782)(cytosol)'                     | 455.67 |
| 'SOD2(Mitochondrial Inner membrane)'                  | 455.67 |
| 'trans-Dec-2-enoyl-CoA(Mitochondrial Inner membrane)' | 455.50 |
| 'MAPT (fragment 2-421)(cytosol)'                      | 455.00 |
| 'BCL2L11(cytosol)'                                    | 454.67 |
| 'MAPT (fragment 422-758)(cytosol)'                    | 454.33 |
| 'Na+(cytosol)'                                        | 454.00 |
| 'PMAIP1(cytosol)'                                     | 454.00 |
| 'CCCP(Mitochondrial Inner membrane)'                  | 453.67 |
| 'CTNNB1 (fragment 1-115)(cytosol)'                    | 453.67 |
| 'STX1A(cytosol)'                                      | 453.33 |
| 'trans-Oct-2-enoyl-CoA(Mitochondrial Inner membrane)' | 453.33 |

|                                                            |        |
|------------------------------------------------------------|--------|
| 'CTNNB1 (fragment 116-376)(cytosol)'                       | 453.00 |
| 'BMX (fragment 1-242)(cytosol)'                            | 452.33 |
| '?-synuclein aggregation(cytosol)'                         | 452.00 |
| 'CYCS(Mitochondrial Inner membrane)'                       | 452.00 |
| 'trans-Hexadec-2-enoyl-CoA(Mitochondrial Inner membrane)'  | 452.00 |
| 'BMX (fragment 243-675)(cytosol)'                          | 451.67 |
| 'Jacob(cytosol)'                                           | 451.17 |
| 'SIRT5(Mitochondrial Inner membrane)'                      | 451.00 |
| 'MST4 (fragment 1-305)(cytosol)'                           | 451.00 |
| 'trans-Tetradec-2-enoyl-CoA(Mitochondrial Inner membrane)' | 450.67 |
| 'trans-Hex-2-enoyl-CoA(Mitochondrial Inner membrane)'      | 450.67 |
| '2-trans-Dodecenoyl-CoA(Mitochondrial Inner membrane)'     | 450.67 |
| 'MST4 (fragment 306-416)(cytosol)'                         | 450.33 |
| 'inclusion bodies(cytosol)'                                | 449.33 |
| 'Carorie_br_restriction(Mitochondrial Inner membrane)'     | 449.00 |
| 'Mitochondria Fusion(Mitochondrial Inner membrane)'        | 448.33 |
| 'SPTAN1 (fragment 1186-2472)(cytosol)'                     | 448.33 |
| 'Mitochondria Fission(Mitochondrial Inner membrane)'       | 448.00 |
| 'BID(cytosol)'                                             | 447.83 |
| 'SPTAN1 (fragment 1-1185)(cytosol)'                        | 447.33 |
| 'ACIN1 (fragment 1094-1341)(cytosol)'                      | 446.67 |
| 'DNA(Nucleus)'                                             | 445.67 |
| 'ACIN1 (fragment 1-1093)(cytosol)'                         | 445.67 |
| 'Caspase-8 dimer(cytosol)'                                 | 445.33 |
| 'GZMB(cytosol)'                                            | 445.33 |
| 'ADD1 (fragment 1-633)(cytosol)'                           | 445.00 |
| 'ADD1 (fragment 634-737)(cytosol)'                         | 444.00 |
| 'extracellular alpha cynuclein(default)'                   | 444.00 |
| 'CASP2(cytosol)'                                           | 443.83 |
| 'CYCS(Nucleus)'                                            | 443.50 |
| 'PAK2 (fragment 1-212)(cytosol)'                           | 443.33 |
| 'PIDDSome(cytosol)'                                        | 442.67 |
| 'PRKCD (fragment 1-329)(cytosol)'                          | 442.33 |
| 'PRKCD (fragment 330-676)(cytosol)'                        | 441.67 |

|                                                                 |        |
|-----------------------------------------------------------------|--------|
| 'PRKCQ (fragment 1-354)(cytosol)'                               | 440.67 |
| 'Autolysosome(Autolysosome)'                                    | 440.33 |
| 'FNTA (fragment 60-379)(cytosol)'                               | 440.00 |
| 'BCAP31 (fragment 165-237)(ER)'                                 | 439.33 |
| 'polyubiquitinated misfolded transmembrane ER protein(cytosol)' | 439.00 |
| 'CREB1(Nucleus)'                                                | 439.00 |
| 'BCAP31 (fragment 238-246)(ER)'                                 | 438.67 |
| 'SCF complex(cytosol)'                                          | 438.33 |
| 'FNTA (fragment 1-59)(cytosol)'                                 | 437.67 |
| 'HMGB1/HMGB2(Nucleus)'                                          | 436.33 |
| 'ROCK1 (fragment 1114-1354)(cytosol)'                           | 436.33 |
| 'BIRC2 (fragment 373-618)(cytosol)'                             | 435.33 |
| 'GAS2 (fragment 1-279)(cytosol)'                                | 434.67 |
| 'GAS2 (fragment 280-313)(cytosol)'                              | 434.00 |
| 'BIRC2 (fragment 1-372)(cytosol)'                               | 433.33 |
| 'VIM (fragment 2-85)(cytosol)'                                  | 432.33 |
| 'VIM (fragment 86-466)(cytosol)'                                | 431.67 |
| 'PLEC (fragment 2396-4684)(cytosol)'                            | 431.00 |
| 'VIM (fragment 2-429)(cytosol)'                                 | 430.00 |
| 'NMT1 (cytosol)'                                                | 429.67 |
| 'VIM (fragment 430-466)(cytosol)'                               | 429.33 |
| 'Thiol reductants(Mitochondrial outer membrane)'                | 429.17 |
| 'SATB1 (fragment 255-763)(Nucleus)'                             | 428.67 |
| 'LMNB1 fragment (232-586)(Nucleus)'                             | 428.00 |
| 'Diazoxide(Mitochondrial outer membrane)'                       | 427.33 |
| 'ATP(Mitochondrial outer membrane)'                             | 427.33 |
| 'LMNA (fragment 231-664)(Nucleus)'                              | 427.00 |
| 'DSG3 (fragment 50-781)(cytosol)'                               | 425.67 |
| 'OCLN (fragment 1-320)(cytosol)'                                | 425.00 |
| 'OCLN (fragment 321-522)(cytosol)'                              | 424.33 |
| 'Na+(default)'                                                  | 424.00 |
| 'TNF(default)'                                                  | 423.67 |
| 'PKP1 (fragmented)(cytosol)'                                    | 423.00 |
| 'IL1B(default)'                                                 | 422.67 |

|                                            |        |
|--------------------------------------------|--------|
| 'DSG1 (fragment 889-1049)(cytosol)'        | 422.33 |
| 'TJP2 (fragment)(cytosol)'                 | 421.00 |
| 'DSP (fragment)(cytosol)'                  | 420.00 |
| 'TJP1 (fragment)(cytosol)'                 | 419.00 |
| 'CASP9(cytosol)'                           | 418.00 |
| 'CASP9(cytosol)'                           | 417.33 |
| 'BBC3(Mitochondrial Inner membrane)'       | 416.00 |
| 'PMAIP1(Mitochondrial Inner membrane)'     | 415.33 |
| 'BCL2L11(Mitochondrial outer membrane)'    | 414.67 |
| 'PPP2CB(cytosol)'                          | 414.67 |
| 'SLC25A14(cytosol)'                        | 413.00 |
| 'SLC25A27(cytosol)'                        | 412.33 |
| 'COX6A1(cytosol)'                          | 411.67 |
| 'COX7C(cytosol)'                           | 411.00 |
| 'SDHB(cytosol)'                            | 410.33 |
| 'COX7A2(cytosol)'                          | 409.67 |
| 'ATP5C1(cytosol)'                          | 409.00 |
| 'COX7A1(cytosol)'                          | 408.33 |
| 'NDUFS3(cytosol)'                          | 407.67 |
| 'SLC25A4(cytosol)'                         | 407.00 |
| 'SLC25A5(cytosol)'                         | 406.33 |
| 'UQCRC1(cytosol)'                          | 405.67 |
| 'CREBBP(Nucleus)'                          | 405.67 |
| 'ATP5A1(cytosol)'                          | 405.00 |
| 'ATP5L(cytosol)'                           | 404.33 |
| 'ATP5O(cytosol)'                           | 403.67 |
| 'cAMP(cytosol)'                            | 403.67 |
| 'COX5B(cytosol)'                           | 403.00 |
| 'CRTC1(cytosol)'                           | 402.67 |
| 'COX7A2L(cytosol)'                         | 402.33 |
| 'tBID:BCL-2(Mitochondrial outer membrane)' | 401.67 |
| 'COX7B(cytosol)'                           | 401.67 |
| 'PPP5C(cytosol)'                           | 401.33 |
| 'MAP3K5(cytosol)'                          | 401.17 |

|                                                     |        |
|-----------------------------------------------------|--------|
| 'NDUFB6(cytosol)'                                   | 401.00 |
| 'ATP5D(cytosol)'                                    | 400.33 |
| 'TRAF2(cytosol)'                                    | 400.00 |
| 'TRAF6(cytosol)'                                    | 400.00 |
| 'NDUFB3(cytosol)'                                   | 399.67 |
| 'NDUFC1(cytosol)'                                   | 399.00 |
| 'NDUFS5(cytosol)'                                   | 398.33 |
| 'SDHA(cytosol)'                                     | 397.67 |
| 'UQCRB(cytosol)'                                    | 397.00 |
| 'Calmodulin:CaMK IV(cytosol)'                       | 396.83 |
| 'NDUFA8(cytosol)'                                   | 396.33 |
| 'NDUFAB1(cytosol)'                                  | 395.67 |
| 'NDUFB5(cytosol)'                                   | 395.00 |
| 'DSG3 (fragment 782-999)(cytosol)'                  | 394.00 |
| 'MCEE(Mitochondrial Inner membrane)'                | 394.00 |
| 'DSG2 (70 Kd fragment)(cytosol)'                    | 393.33 |
| 'DSG1 (fragment 50-888)(cytosol)'                   | 392.33 |
| 'CDH1 (fragment 155-750)(cytosol)'                  | 391.67 |
| 'CDH1 (fragment 751-882) (cytosol)'                 | 391.00 |
| 'VIM (fragment 260-466)(cytosol)'                   | 389.67 |
| 'VIM (fragment 2-259)(cytosol)'                     | 389.00 |
| 'D-methylmalonyl-CoA(Mitochondrial Inner membrane)' | 389.00 |
| 'BCAP31 (fragment 2-164)(ER)'                       | 388.33 |
| 'PLEC (fragment 1-2395)(cytosol)'                   | 387.67 |
| 'Acetaldehyde(Mitochondrial Inner membrane)'        | 387.17 |
| 'LMNB1 (fragment 1-231)(Nucleus)'                   | 386.33 |
| 'LMNA (fragment 1-230)(Nucleus)'                    | 385.67 |
| 'SATB1 (fragment 1-254)(Nucleus)'                   | 385.00 |
| 'CLSPN (fragment 1073-1332)(Nucleus)'               | 384.00 |
| 'AMP(cytosol)'                                      | 383.67 |
| 'DFFA (fragment 118-224)(Nucleus)'                  | 383.00 |
| 'PRKCQ (fragment 355-706)(cytosol)'                 | 381.67 |
| 'ROCK1 (fragment 1-1113)(cytosol)'                  | 381.00 |
| 'SLC18A2(cytosol)'                                  | 379.67 |

|                                                                                 |        |
|---------------------------------------------------------------------------------|--------|
| 'ubiquitin positive aggregates(cytosol)'                                        | 379.33 |
| 'ERAD defect(cytosol)'                                                          | 378.67 |
| 'inclusions of ubiquitilated TDP-43(cytosol)'                                   | 378.00 |
| 'SYT1(cytosol)'                                                                 | 378.00 |
| 'IBMPFD(cytosol)'                                                               | 377.33 |
| 'type 3 spinocerebellar ataxia(cytosol)'                                        | 376.67 |
| 'Amino acids(cytosol)'                                                          | 375.33 |
| 'Pi(cytosol)'                                                                   | 373.67 |
| 'L-Palmitoylcarnitine(Mitochondrial outer membrane)'                            | 373.33 |
| 'Mg2+(default)'                                                                 | 373.00 |
| 'Acetylated succinate dehydrogenase (complex II)(Mitochondrial Inner membrane)' | 372.50 |
| 'Na+ (cytosol)'                                                                 | 372.33 |
| 'IL1B(microglia)'                                                               | 372.33 |
| 'H+ (Mitochondrial Inner membrane)'                                             | 371.67 |
| '3-trans-decenoyl-CoA(Mitochondrial Inner membrane)'                            | 371.33 |
| 'K+(Mitochondrial Inner membrane)'                                              | 371.00 |
| 'TNF(astrocyte)'                                                                | 371.00 |
| 'IL1B(astrocyte)'                                                               | 371.00 |
| 'bicuculline(cytosol)'                                                          | 370.00 |
| 's4898(cytosol)'                                                                | 369.00 |
| 's4881(cytosol)'                                                                | 368.33 |
| 's49(cytosol)'                                                                  | 367.67 |
| 's4503(Mitochondrial Inner membrane)'                                           | 367.00 |
| 's253(cytosol)'                                                                 | 366.33 |
| 's252(cytosol)'                                                                 | 365.67 |
| 's251(cytosol)'                                                                 | 365.00 |
| 's250(cytosol)'                                                                 | 364.33 |
| 'Jacob:importin alpha(cytosol)'                                                 | 364.33 |
| 's183(cytosol)'                                                                 | 363.67 |
| 'a24_degraded(cytosol)'                                                         | 363.00 |
| 's2319(cytosol)'                                                                | 362.33 |
| 's2193(cytosol)'                                                                | 361.67 |
| 's1695(cytosol)'                                                                | 361.00 |
| 'ATG1 kinase complex(cytosol)'                                                  | 360.00 |

|                                                               |        |
|---------------------------------------------------------------|--------|
| 'ubiquitin-VCP complex(cytosol)'                              | 359.00 |
| 'TARP-PSD95-Mdm2(cytosol)'                                    | 358.00 |
| 'BCL2:VDAC1(Mitochondrial outer membrane)'                    | 357.00 |
| 'Ku70:BAX complex(cytosol)'                                   | 355.33 |
| 'HMGB1/HMGB2- bound chromatin(Nucleus)'                       | 354.33 |
| 'DFF cleaved DNA(Nucleus)'                                    | 353.67 |
| 'CAMK4(cytosol)'                                              | 352.67 |
| 'APC fragment(1-777)(cytosol)'                                | 352.33 |
| 'caspase-7(cytosol)'                                          | 351.33 |
| 'SMAC:XIAP(cytosol)'                                          | 350.67 |
| 'Bcl2:BH3-only protein complex(Mitochondrial outer membrane)' | 350.00 |
| 'phospho-dynein(DLC1) on microtubules(cytosol)'               | 349.33 |
| 'phospho-dynein(DLC2) on microtubules(cytosol)'               | 348.67 |
| 'BAD:BCL-2(Mitochondrial outer membrane)'                     | 347.67 |
| 'APC fragment(778-2483)(cytosol)'                             | 346.33 |
| 'importin-?(cytosol)'                                         | 342.50 |

**Total Inforamtion**  
**Node Names (Position)**

|                                                                              | <b>Scores</b> |
|------------------------------------------------------------------------------|---------------|
| 'ADP(cytosol)'                                                               | 1163.25       |
| 'H+(Mitochondrial Inner membrane)'                                           | 1162.50       |
| 'ATP(cytosol)'                                                               | 1160.50       |
| 'H+(cytosol)'                                                                | 1153.25       |
| 'CoA-SH(cytosol)'                                                            | 1153.00       |
| 'PPARGC1A(Nucleus)'                                                          | 1151.75       |
| 'Pyruvate (cytosol)'                                                         | 1149.00       |
| 'ROS(Mitochondrial Inner membrane)'                                          | 1148.50       |
| 'caspase-3(cytosol)'                                                         | 1148.25       |
| 'ROS(cytosol)'                                                               | 1144.50       |
| 'CoA-SH(Mitochondrial Inner membrane)'                                       | 1143.75       |
| 'L-Lactate (cytosol)'                                                        | 1142.00       |
| 'Ca2+(cytosol)'                                                              | 1139.75       |
| 'H2O(cytosol)'                                                               | 1137.25       |
| 'NADH(Mitochondrial Inner membrane)'                                         | 1137.00       |
| 'CREB dependent_br_transcription(Nucleus)'                                   | 1136.75       |
| 'NAD+(cytosol)'                                                              | 1136.75       |
| 'NAD+(Mitochondrial Inner membrane)'                                         | 1136.50       |
| 'H2O2(Mitochondrial Inner membrane)'                                         | 1135.25       |
| 'H2O2(cytosol)'                                                              | 1133.25       |
| 'Docked dopamine loaded synaptic vesicle(Docked DA loaded synaptic vesicle)' | 1131.75       |
| 'Pyruvate (Mitochondrial Inner membrane)'                                    | 1130.75       |
| 'H2O(Mitochondrial Inner membrane)'                                          | 1129.50       |
| 'Dopamine(cytosol)'                                                          | 1127.00       |
| 'MAPK8(cytosol)'                                                             | 1125.50       |
| '2-Oxoglutarate(Mitochondrial Inner membrane)'                               | 1125.00       |
| 'FAD(Mitochondrial Inner membrane)'                                          | 1123.25       |



|                                                                        |         |
|------------------------------------------------------------------------|---------|
| 'membrane potential(Mitochondrial Inner membrane)'                     | 1122.75 |
| 'AMPA receptors containing GluR2 (homomers)(cytosol)'                  | 1122.50 |
| 'FADH2(Mitochondrial Inner membrane)'                                  | 1122.25 |
| 'SNCA (oligomer)(cytosol)'                                             | 1118.25 |
| 'Acetyl-CoA (Mitochondrial Inner membrane)'                            | 1117.00 |
| 'K48 polyubiquitinated protein(cytosol)'                               | 1113.75 |
| 'Acetyl-CoA(Mitochondrial Inner membrane)'                             | 1109.75 |
| 'H+(Mitochondrial outer membrane)'                                     | 1108.75 |
| 'Mitochondrial dysfunction(Mitochondrial Inner membrane)'              | 1107.75 |
| 'alpha-D-Glucose 6-phosphate(cytosol)'                                 | 1104.50 |
| 'pyruvate dehydrogenase complex(Mitochondrial Inner membrane)'         | 1103.75 |
| 'ubiquitin(cytosol)'                                                   | 1102.00 |
| 'L-Malate (Mitochondrial Inner membrane)'                              | 1100.25 |
| 'misfolded SNCA(cytosol)'                                              | 1099.75 |
| 'ADP(Mitochondrial Inner membrane)'                                    | 1097.25 |
| 'Succinyl-CoA(Mitochondrial Inner membrane)'                           | 1095.25 |
| 'CREB1(Nucleus)'                                                       | 1094.00 |
| 'DOPAL(cytosol)'                                                       | 1090.25 |
| 'phosphorylated pyruvate dehydrogenase complex(Mitochondrial Inner mem | 1088.25 |
| 'Malonyl-CoA(cytosol)'                                                 | 1088.25 |
| 'MAP2K7(cytosol)'                                                      | 1085.75 |
| 'NADH(cytosol)'                                                        | 1085.75 |
| 'MAP2K4(cytosol)'                                                      | 1085.00 |
| 'mitochondria depolarization(Mitochondrial Inner membrane)'            | 1082.50 |
| 'MAPK1(cytosol)'                                                       | 1082.25 |
| 'TXN(cytosol)'                                                         | 1080.25 |
| 'O2(cytosol)'                                                          | 1080.25 |
| 'ROS(default)'                                                         | 1079.75 |
| 'NADP+(Mitochondrial Inner membrane)'                                  | 1078.25 |
| 'DAG(cytosol)'                                                         | 1074.00 |
| 'CYCS(cytosol)'                                                        | 1072.75 |
| 'palmitoyl-CoA(cytosol)'                                               | 1072.50 |
| 'beta-D-Fructose 6-phosphate(cytosol)'                                 | 1063.75 |
| 'Orthophosphate(Mitochondrial Inner membrane)'                         | 1063.25 |

|                                                          |         |
|----------------------------------------------------------|---------|
| 'membrane permeability(Mitochondrial Inner membrane)'    | 1062.75 |
| '1-3-Bisphospho-D-glycerate(cytosol)'                    | 1061.75 |
| 'BAX(cytosol)'                                           | 1061.00 |
| 'beta-D-Fructose 1-6-bisphosphate(cytosol)'              | 1060.50 |
| 'ubiquinol(Mitochondrial Inner membrane)'                | 1059.25 |
| '3-Phospho-D-glycerate(cytosol)'                         | 1058.00 |
| 'D-Glyceraldehyde 3-phosphate(cytosol)'                  | 1056.75 |
| 'D-beta hydroxybutyrate(Mitochondrial Inner membrane)'   | 1056.75 |
| 'G3P(cytosol)'                                           | 1056.50 |
| 'ASK1 signalsome(cytosol)'                               | 1056.25 |
| 'DIABLO(cytosol)'                                        | 1054.25 |
| 'Oxaloacetate (Mitochondrial Inner membrane)'            | 1054.25 |
| 'tBID(Mitochondrial outer membrane)'                     | 1053.25 |
| 'Acetyl-CoA(cytosol)'                                    | 1052.25 |
| 'L-Dopa(cytosol)'                                        | 1051.75 |
| 'PINK1:PARK2(Mitochondrial outer membrane)'              | 1050.25 |
| 'BAX(Mitochondrial outer membrane)'                      | 1047.75 |
| 'NAD+ (Mitochondrial Inner membrane)'                    | 1047.50 |
| 'CoA-SH (Mitochondrial Inner membrane)'                  | 1046.75 |
| 'Succinate(Mitochondrial Inner membrane)'                | 1044.75 |
| 'ATP-sensitive K+ channel(Mitochondrial Inner membrane)' | 1043.75 |
| 'Cytochrome C:Apaf-1:ATP:Procaspase-9(cytosol)'          | 1042.50 |
| 'ATP(Mitochondrial Inner membrane)'                      | 1042.50 |
| 'CYCS(Mitochondrial Inner membrane)'                     | 1041.75 |
| 'palmitoyl-CoA(Mitochondrial Inner membrane)'            | 1041.00 |
| 'Ca2+(Mitochondrial Inner membrane)'                     | 1040.75 |
| 'Complex_br_(ubiquitin/E1)(cytosol)'                     | 1039.75 |
| '2-Phospho-D-glycerate(cytosol)'                         | 1038.50 |
| 'CO2 (Mitochondrial Inner membrane)'                     | 1037.75 |
| '26S hybrid proteasome(cytosol)'                         | 1037.25 |
| 'AMP(cytosol)'                                           | 1035.75 |
| 'E2- E3-substrate complex(cytosol)'                      | 1034.75 |
| 'CO2(Mitochondrial Inner membrane)'                      | 1034.75 |
| 'Oxidative stress(Mitochondrial Inner membrane)'         | 1031.00 |

|                                                                  |         |
|------------------------------------------------------------------|---------|
| 'Orthophosphate(cytosol)'                                        | 1030.75 |
| 'MAPK10(cytosol)'                                                | 1029.75 |
| 'MAPK9(cytosol)'                                                 | 1029.00 |
| 'TXN(cytosol)'                                                   | 1027.75 |
| 'Citrate(Mitochondrial Inner membrane)'                          | 1027.75 |
| 'Autophagosome(cytosol)'                                         | 1025.25 |
| 'Isocitrate(Mitochondrial Inner membrane)'                       | 1024.75 |
| 'acetoacetyl-CoA(Mitochondrial Inner membrane)'                  | 1024.75 |
| 'tBID(cytosol)'                                                  | 1023.25 |
| 'NMDA receptor complex(cytosol)'                                 | 1021.75 |
| 'alpha-D-Glucose(cytosol)'                                       | 1020.50 |
| 'caspase-3-cleaved DFF45 (117-224):DFF40 complex(Nucleus)'       | 1018.25 |
| 'Microgria activation(microglia)'                                | 1018.00 |
| 'AMPK(cytosol)'                                                  | 1017.50 |
| 'Calmodulin(cytosol)'                                            | 1017.25 |
| 'arachidonoyl-CoA(cytosol)'                                      | 1016.00 |
| 'permeable pore(cytosol)'                                        | 1015.00 |
| 'BAK1(Mitochondrial outer membrane)'                             | 1013.50 |
| 'H2O (Mitochondrial Inner membrane)'                             | 1011.50 |
| '(S)-3-Hydroxyhexadecanoyl-CoA(Mitochondrial Inner membrane)'    | 1010.75 |
| 'Lysosome(Lysosome)'                                             | 1009.75 |
| 'TXN(Mitochondrial Inner membrane)'                              | 1006.25 |
| 'Complex_br_(ubiquitin/E1)(cytosol)'                             | 1002.50 |
| 'Acetoacetate(Mitochondrial Inner membrane)'                     | 1001.25 |
| 'PGH2(cytosol)'                                                  | 1000.25 |
| 'trans-cis-Lauro-2-6-dienoyl-CoA (Mitochondrial Inner membrane)' | 998.00  |
| 'acetoacetate(Mitochondrial Inner membrane)'                     | 997.75  |
| '3-hydroxyoctadecanoyl-CoA(cytosol)'                             | 997.75  |
| '3-oxooctadecanoyl-CoA(cytosol)'                                 | 997.25  |
| 'SNAP25(cytosol)'                                                | 994.25  |
| 'TAK1(cytosol)'                                                  | 993.50  |
| 'Intrinsic apoptosis(Mitochondrial Inner membrane)'              | 993.00  |
| 'Phosphoenolpyruvate(cytosol)'                                   | 992.50  |
| '(S)-Hydroxydecanoyl-CoA(Mitochondrial Inner membrane)'          | 992.25  |

|                                                                 |        |
|-----------------------------------------------------------------|--------|
| '1-acyl LPA(cytosol)'                                           | 992.25 |
| '2-3-Bisphospho-D-glycerate(cytosol)'                           | 991.50 |
| '(S)-Hydroxyhexanoyl-CoA(Mitochondrial Inner membrane)'         | 990.75 |
| 'PPARGC1A(Nucleus)'                                             | 986.50 |
| 'CYCS(Mitochondrial Inner membrane)'                            | 985.75 |
| 'O2-(Mitochondrial Inner membrane)'                             | 985.00 |
| 'trans-Dec-2-enoyl-CoA(Mitochondrial Inner membrane)'           | 984.75 |
| 'Fe(III)(cytosol)'                                              | 984.25 |
| 'NADH-Q oxireductase (complex I)(Mitochondrial Inner membrane)' | 983.50 |
| 'ACADL(Mitochondrial Inner membrane)'                           | 983.50 |
| 'OH•(Mitochondrial Inner membrane)'                             | 980.00 |
| 'CRTC1(Nucleus)'                                                | 979.50 |
| 'SNARE complex(cytosol)'                                        | 978.50 |
| 'ASK1 signalsome(cytosol)'                                      | 978.00 |
| '(S)-3-Hydroxybutanoyl-CoA(Mitochondrial Inner membrane)'       | 977.75 |
| '4-cis-decenoyl-CoA(Mitochondrial Inner membrane)'              | 975.75 |
| 'ROS(microglia)'                                                | 975.50 |
| 'NADPH(Mitochondrial Inner membrane)'                           | 974.25 |
| 'Apoptosome (cytosol)'                                          | 973.00 |
| 'Dopamine(default)'                                             | 972.00 |
| '(S)-3-Hydroxydodecanoyl-CoA(Mitochondrial Inner membrane)'     | 971.25 |
| '(S)-3-Hydroxytetradecanoyl-CoA(Mitochondrial Inner membrane)'  | 968.75 |
| 'Carnitine(Mitochondrial Inner membrane)'                       | 968.25 |
| 'SMAC:XIAP:Caspase-3(cytosol)'                                  | 968.00 |
| 'cis-cis-3-6-Dodecadienoyl-CoA(Mitochondrial Inner membrane)'   | 967.25 |
| 'HOO•(cytosol)'                                                 | 967.25 |
| 'Raf/Mek(cytosol)'                                              | 965.50 |
| 'RasGRF(cytosol)'                                               | 964.50 |
| 'Electron Leakage at Complex I(Mitochondrial Inner membrane)'   | 964.25 |
| 'SMAC:XIAP:Caspase-7(cytosol)'                                  | 963.50 |
| 'Mitochondrial dysfunction(default)'                            | 963.50 |
| '(S)-Hydroxyoctanoyl-CoA(Mitochondrial Inner membrane)'         | 963.25 |
| '(R)-2-hydroxyglutarate(Mitochondrial Inner membrane)'          | 961.75 |
| 'IKK complex(cytosol)'                                          | 960.50 |

|                                                                      |        |
|----------------------------------------------------------------------|--------|
| 'Protein misfolding(default)'                                        | 959.25 |
| 'Dopamine loaded synaptic vesicle(DA loaded synaptic vesicle)'       | 958.00 |
| 'E2(cytosol)'                                                        | 958.00 |
| 'NF-kB:IkB(cytosol)'                                                 | 957.50 |
| 'beta-D-Glucose 6-phosphate(cytosol)'                                | 957.50 |
| 'ubiquinone(Mitochondrial Inner membrane)'                           | 957.25 |
| 'Acetoacetyl-CoA(Mitochondrial Inner membrane)'                      | 956.75 |
| 'Palmitate(cytosol)'                                                 | 955.25 |
| 'DFFB(Nucleus)'                                                      | 955.00 |
| 'tBID:BAX(cytosol)'                                                  | 953.50 |
| 'UBL-acyl adenylate intermediate(cytosol)'                           | 947.50 |
| 'L-Palmitoylcarnitine(Mitochondrial Inner membrane)'                 | 947.00 |
| 'membrane depolarization(cytosol)'                                   | 946.50 |
| 'GSH(cytosol)'                                                       | 946.00 |
| 'O2(Mitochondrial Inner membrane)'                                   | 943.00 |
| 'Hexanoyl-CoA(Mitochondrial Inner membrane)'                         | 941.50 |
| 'GSSG(cytosol)'                                                      | 941.25 |
| 'Fumarate (Mitochondrial Inner membrane)'                            | 939.50 |
| 'Neuroinflammation(default)'                                         | 938.25 |
| '3-trans-decenoyl-CoA(Mitochondrial Inner membrane)'                 | 937.00 |
| 'OH•(cytosol)'                                                       | 937.00 |
| 'MAPK14(cytosol)'                                                    | 936.50 |
| 'Protein target(cytosol)'                                            | 935.50 |
| 'tBID:BAK(Mitochondrial outer membrane)'                             | 935.00 |
| 'Octanoyl-CoA(Mitochondrial Inner membrane)'                         | 934.00 |
| '1-2-diacyl-glycerol 3-phosphate(cytosol)'                           | 932.25 |
| 'VDAC1:HDAC6:p62(cytosol)'                                           | 931.50 |
| 'GSSG(Mitochondrial Inner membrane)'                                 | 931.25 |
| 'E3(cytosol)'                                                        | 930.00 |
| 'Acetaldehyde(cytosol)'                                              | 929.75 |
| 'Succinate dehydrogenase (complex II)(Mitochondrial Inner membrane)' | 929.25 |
| 'Autolysosome(cytosol)'                                              | 928.50 |
| 'mTOR complex 1 (mTORC1)(cytosol)'                                   | 928.00 |
| 'DOPAC(cytosol)'                                                     | 927.25 |

|                                                                      |        |
|----------------------------------------------------------------------|--------|
| 'Pentose phosphate pathway(cytosol)'                                 | 927.00 |
| 'isocitrate dehydrogenase(Mitochondrial Inner membrane)'             | 926.25 |
| 'PAK2 (p34)(cytosol)'                                                | 926.00 |
| 'D-methylmalonyl-CoA(Mitochondrial Inner membrane)'                  | 926.00 |
| 'GLUD1(Mitochondrial Inner membrane)'                                | 925.25 |
| 'trans-Hexadec-2-enoyl-CoA(Mitochondrial Inner membrane)'            | 925.00 |
| 'activated LRRK2(cytosol)'                                           | 924.75 |
| 'Failure of protein quality control(default)'                        | 924.75 |
| 'Tyrosine 3-monooxygenase (Fe2+ cofactor)(cytosol)'                  | 924.25 |
| 'SMAC:XIAP:Caspase-9(cytosol)'                                       | 923.50 |
| 'Apaf-1:Cytochrome C(cytosol)'                                       | 921.00 |
| 'CASP9(cytosol)'                                                     | 921.00 |
| 'Fe(III)(Mitochondrial Inner membrane)'                              | 918.75 |
| 'VDAC1(Mitochondrial outer membrane)'                                | 918.00 |
| 'IL-1R(cytosol)'                                                     | 918.00 |
| 'HOO•(Mitochondrial Inner membrane)'                                 | 916.75 |
| 'UBA1(cytosol)'                                                      | 916.00 |
| 'TNFR(cytosol)'                                                      | 915.50 |
| 'AMPA receptor ligand complex(cytosol)'                              | 914.50 |
| 'MAPT(cytosol)'                                                      | 912.25 |
| 'Rab3:RIM(cytosol)'                                                  | 910.75 |
| 'tetrodotoxin(cytosol)'                                              | 909.75 |
| 'TSC2(cytosol)'                                                      | 909.50 |
| 'MAPT(cytosol)'                                                      | 908.25 |
| 'CREB:TORC1(Nucleus)'                                                | 906.50 |
| 'CREB:TORC2(Nucleus)'                                                | 906.00 |
| 'Glycerone phosphate(cytosol)'                                       | 905.75 |
| 'Succinate dehydrogenase (complex II)(Mitochondrial Inner membrane)' | 905.50 |
| 'alpha cynuclein(microglia)'                                         | 905.00 |
| 'CRTC2(cytosol)'                                                     | 904.50 |
| 'MAP3K5(cytosol)'                                                    | 902.50 |
| 'O2-(Mitochondrial outer membrane)'                                  | 902.50 |
| 'Isolation membrane (IM)(cytosol)'                                   | 902.25 |
| 'CO2(cytosol)'                                                       | 902.00 |

|                                                                    |        |
|--------------------------------------------------------------------|--------|
| '1-chloro-2-4-dinitrobenzene (cytosol)'                            | 901.25 |
| 'PAK2(cytosol)'                                                    | 901.00 |
| 'CYCS(Nucleus)'                                                    | 899.00 |
| 'K63-polyubiquitinated midfoded DJ-1(cytosol)'                     | 897.50 |
| 'HMGCS2(Mitochondrial Inner membrane)'                             | 897.00 |
| 'BECN1(cytosol)'                                                   | 896.75 |
| 'DNM1L(Mitochondrial outer membrane)'                              | 894.75 |
| 'anchored proteasome(cytosol)'                                     | 894.00 |
| 'succinate semialdehyde(Mitochondrial Inner membrane)'             | 893.50 |
| 'CASP3(cytosol)'                                                   | 893.00 |
| 'Electron Leakage at Complex III(Mitochondrial Inner membrane)'    | 892.50 |
| 'Ras:GTP(cytosol)'                                                 | 891.50 |
| 'Butanoyl-CoA(Mitochondrial Inner membrane)'                       | 891.00 |
| 'Lauroyl-CoA(Mitochondrial Inner membrane)'                        | 890.50 |
| 'SIRT3(Nucleus)'                                                   | 890.00 |
| 'myristoyl-CoA(Mitochondrial Inner membrane)'                      | 890.00 |
| 'CASP7(cytosol)'                                                   | 888.50 |
| 'trans-Hex-2-enoyl-CoA(Mitochondrial Inner membrane)'              | 888.00 |
| '2-trans-4-cis-decadienoyl-CoA(Mitochondrial Inner membrane)'      | 887.00 |
| 'NF- $\kappa$ B: I $\kappa$ B(cytosol)'                            | 885.00 |
| '3-Oxo-octanoyl-CoA(Mitochondrial Inner membrane)'                 | 885.00 |
| 'beta-D-Glucose(cytosol)'                                          | 883.50 |
| '3-Oxohexanoyl-CoA(Mitochondrial Inner membrane)'                  | 883.00 |
| '3-Oxopalmitoyl-CoA(Mitochondrial Inner membrane)'                 | 882.50 |
| '3-Oxotetradecanoyl-CoA(Mitochondrial Inner membrane)'             | 881.50 |
| '3-Oxododecanoyl-CoA(Mitochondrial Inner membrane)'                | 880.50 |
| 'DFF40 associated with chromatin(Nucleus)'                         | 878.00 |
| 'polyubiquitinated misfolded transmembrane ER protein(cytosol)'    | 878.00 |
| 'NF- $\kappa$ B(cytosol)'                                          | 878.00 |
| 'PINK1(Mitochondrial Inner membrane)'                              | 877.00 |
| '(S)-3-Hydroxy-3-methylglutaryl-CoA(Mitochondrial Inner membrane)' | 877.00 |
| '3-Oxododecanoyl-CoA(Mitochondrial Inner membrane)'                | 876.50 |
| 'Fe(II)(Mitochondrial Inner membrane)'                             | 875.50 |
| 'GSH(Mitochondrial Inner membrane)'                                | 875.00 |

|                                                     |        |
|-----------------------------------------------------|--------|
| 'NADP+(cytosol)'                                    | 875.00 |
| 'RPS6KA1(cytosol)'                                  | 874.25 |
| 'RPS6KA2(cytosol)'                                  | 874.25 |
| 'RPS6KA6(cytosol)'                                  | 874.25 |
| 'RPS6KA3(cytosol)'                                  | 874.25 |
| 'BCL6(Nucleus)'                                     | 874.25 |
| 'TXN(Mitochondrial Inner membrane)'                 | 874.00 |
| 'NF-kB(cytosol)'                                    | 873.50 |
| 'Decanoyl-CoA(Mitochondrial Inner membrane)'        | 872.00 |
| 'HMG CoA(Mitochondrial Inner membrane)'             | 871.50 |
| 'Fe(II)(cytosol)'                                   | 870.50 |
| 'TARP:DLG4:MDM2(cytosol)'                           | 870.50 |
| 'NMDA receptor complex(cytosol)'                    | 870.00 |
| 'Na+(cytosol)'                                      | 869.00 |
| 'CREB:CBP(Nucleus)'                                 | 868.50 |
| 'PTGS2(Nucleus)'                                    | 868.00 |
| 'Pi(cytosol)'                                       | 865.25 |
| 'E2(cytosol)'                                       | 864.00 |
| 'PTGS2(cytosol)'                                    | 862.00 |
| 'SNARE complex(Docked DA loaded synaptic vesicle)'  | 861.75 |
| 'VDAC1(Mitochondrial outer membrane)'               | 861.50 |
| 'BAK1(Mitochondrial outer membrane)'                | 860.00 |
| '4-hydroxybutyrate(Mitochondrial Inner membrane)'   | 857.25 |
| 'PARK7(Mitochondrial Inner membrane)'               | 856.00 |
| 'PPi(cytosol)'                                      | 855.50 |
| 'CREB1(Nucleus)'                                    | 852.00 |
| 'H2O2(Mitochondrial outer membrane)'                | 852.00 |
| 'Mitochondria Fusion(Mitochondrial Inner membrane)' | 851.50 |
| 'CaMKII:Calmodulin:Ca2(cytosol)'                    | 850.00 |
| 'NADPH(cytosol)'                                    | 849.75 |
| 'Acetate(Mitochondrial Inner membrane)'             | 849.00 |
| 'ROS(astrocyte)'                                    | 848.00 |
| 'LC3:VDAC1:HDAC6:p62(cytosol)'                      | 847.50 |
| 'Calmodulin:CaMK IV(cytosol)'                       | 846.00 |



|                                                                                |        |
|--------------------------------------------------------------------------------|--------|
| 'Calmodulin:CaMK IV(Nucleus)'                                                  | 845.00 |
| 'Jacob:importin alpha(Nucleus)'                                                | 843.00 |
| 'Crotonoyl-CoA(Mitochondrial Inner membrane)'                                  | 842.00 |
| '2-trans-Dodecenoyl-CoA(Mitochondrial Inner membrane)'                         | 840.00 |
| 'trans-Tetradec-2-enoyl-CoA(Mitochondrial Inner membrane)'                     | 839.50 |
| 'ADP (Mitochondrial Inner membrane)'                                           | 835.75 |
| 'HTRA2(cytosol)'                                                               | 834.50 |
| 'FASN(cytosol)'                                                                | 831.25 |
| 'PPP2CA(cytosol)'                                                              | 831.00 |
| 'CSP:Hsc70:SGT(cytosol)'                                                       | 830.00 |
| 'L-methylmalonyl-CoA(Mitochondrial Inner membrane)'                            | 829.50 |
| 'IL1B(default)'                                                                | 829.00 |
| 'Jacob:importin alpha(cytosol)'                                                | 828.50 |
| 'Caspase-2(cytosol)'                                                           | 827.00 |
| 'trans-Oct-2-enoyl-CoA(Mitochondrial Inner membrane)'                          | 826.25 |
| 'VAMP2(cytosol)'                                                               | 823.50 |
| 'trans-octadec-2-enoyl-CoA(cytosol)'                                           | 821.50 |
| 'SNCA (fibril)(cytosol)'                                                       | 821.00 |
| 'NF- $\kappa$ B:I $\kappa$ B(cytosol)'                                         | 820.50 |
| 'classic PI3K complex(cytosol)'                                                | 820.00 |
| 'TNF(default)'                                                                 | 820.00 |
| 'CREBBP(Nucleus)'                                                              | 819.50 |
| 'HV Aldehyde(cytosol)'                                                         | 819.50 |
| 'PINK1(Mitochondrial outer membrane)'                                          | 818.50 |
| 'SOD2(Mitochondrial Inner membrane)'                                           | 817.00 |
| '143B:phospho-BAD complex(cytosol)'                                            | 816.25 |
| 'BAD(cytosol)'                                                                 | 814.75 |
| 'Lewy Body(Lewy Body)'                                                         | 814.00 |
| 'misfolded transmembrane ER protein(ER)'                                       | 814.00 |
| 'ubiquinol_cytochrome-c reductase (complex III)(Mitochondrial Inner membrane)' | 813.75 |
| 'L-Lactate (default)'                                                          | 813.00 |
| 'Mitochondria Fission(Mitochondrial Inner membrane)'                           | 810.75 |
| 'Lysosome biogenesis(cytosol)'                                                 | 810.75 |
| 'Acetate(cytosol)'                                                             | 810.75 |

|                                    |        |
|------------------------------------|--------|
| 'O2-(cytosol)'                     | 810.50 |
| 'YWHAB(cytosol)'                   | 808.00 |
| '3-O-Methyldopamine(cytosol)'      | 808.00 |
| 'PGG2(cytosol)'                    | 807.25 |
| 'Autolysosome(Autolysosome)'       | 805.50 |
| 'Caspase-8(ER)'                    | 805.00 |
| 'PMAIP1(cytosol)'                  | 805.00 |
| 'BBC3(cytosol)'                    | 805.00 |
| 'HTRA2(cytosol)'                   | 804.50 |
| '?-synuclein aggregation(cytosol)' | 803.00 |
| 'SNAP25 (misfolded)(cytosol)'      | 802.00 |
| 'misfolded protein(cytosol)'       | 801.75 |
| 'SLC25A27(Nucleus)'                | 799.75 |
| 'SLC25A14(Nucleus)'                | 799.75 |
| 'ATF3(Nucleus)'                    | 799.75 |
| 'HVA(cytosol)'                     | 797.50 |
| 'BCL2L11(cytosol)'                 | 789.00 |
| 'BMF(cytosol)'                     | 789.00 |
| 'COX7A2L(Nucleus)'                 | 789.00 |
| 'COX7B(Nucleus)'                   | 789.00 |
| 'COX7C(Nucleus)'                   | 789.00 |
| 'NDUFA8(Nucleus)'                  | 789.00 |
| 'NDUFAB1(Nucleus)'                 | 789.00 |
| 'NDUFB3(Nucleus)'                  | 789.00 |
| 'NDUFB5(Nucleus)'                  | 789.00 |
| 'NDUFB6(Nucleus)'                  | 789.00 |
| 'ATP5A1(Nucleus)'                  | 789.00 |
| 'ATP5C1(Nucleus)'                  | 789.00 |
| 'ATP5D(Nucleus)'                   | 789.00 |
| 'ATP5L(Nucleus)'                   | 789.00 |
| 'ATP5O(Nucleus)'                   | 789.00 |
| 'COX5B(Nucleus)'                   | 789.00 |
| 'COX6A1(Nucleus)'                  | 789.00 |
| 'COX7A1(Nucleus)'                  | 789.00 |

|                                                 |        |
|-------------------------------------------------|--------|
| 'COX7A2(Nucleus)'                               | 789.00 |
| 'NDUFC1(Nucleus)'                               | 789.00 |
| 'NDUFS5(Nucleus)'                               | 789.00 |
| 'SDHA(Nucleus)'                                 | 789.00 |
| 'SDHB(Nucleus)'                                 | 789.00 |
| 'SLC25A4(Nucleus)'                              | 789.00 |
| 'SLC25A5(Nucleus)'                              | 789.00 |
| 'UQCRB(Nucleus)'                                | 789.00 |
| 'UQCRC1(Nucleus)'                               | 789.00 |
| 'Serpib 2(Nucleus)'                             | 789.00 |
| 'Nr4a1(Nucleus)'                                | 789.00 |
| 'Npas4(Nucleus)'                                | 789.00 |
| 'INHBA(Nucleus)'                                | 789.00 |
| 'GADD45G(Nucleus)'                              | 789.00 |
| 'GADD45B(Nucleus)'                              | 789.00 |
| 'BTG2(Nucleus)'                                 | 789.00 |
| 'Orthophosphate (Mitochondrial Inner membrane)' | 788.25 |
| 'PGE2(cytosol)'                                 | 788.00 |
| 'NO(cytosol)'                                   | 785.50 |
| 'NH3 (cytosol)'                                 | 783.75 |
| 'EPB41L1(cytosol)'                              | 781.75 |
| 'AKAP5(cytosol)'                                | 781.25 |
| 'H2O2 (cytosol)'                                | 780.75 |
| 'PAK2 (p34)(cytosol)'                           | 780.00 |
| 'NDUFS3(Nucleus)'                               | 778.00 |
| 'MAOA:FAD(Mitochondrial outer membrane)'        | 777.50 |
| 'VCP(cytosol)'                                  | 777.25 |
| 'HADH(Mitochondrial Inner membrane)'            | 775.50 |
| 'MAPK1(cytosol)'                                | 771.00 |
| 'tBID:BCL-2(Mitochondrial outer membrane)'      | 770.50 |
| 'inclusion bodies(cytosol)'                     | 767.00 |
| 'linoleoyl-CoA(Mitochondrial Inner membrane)'   | 766.00 |
| 'Citrate lyase(cytosol)'                        | 765.50 |
| 'Citrate(cytosol)'                              | 765.00 |

|                                                                 |        |
|-----------------------------------------------------------------|--------|
| 'L-Glutamate(default)'                                          | 763.50 |
| 'L-Glutamate(Mitochondrial Inner membrane)'                     | 763.00 |
| 'Ethanol(cytosol)'                                              | 761.50 |
| 'D-Glucose 1-phosphate(cytosol)'                                | 761.00 |
| 'XRCC6(cytosol)'                                                | 760.00 |
| '4a-hydroxytetrahydrobiopterin(cytosol)'                        | 759.50 |
| 'STX1A(cytosol)'                                                | 759.00 |
| 'stearoyl-CoA(cytosol)'                                         | 759.00 |
| 'SLC18A2(cytosol)'                                              | 758.00 |
| 'SYT1(cytosol)'                                                 | 757.25 |
| 'ACSL6(c26)'                                                    | 755.50 |
| 'ACSL5(c26)'                                                    | 755.00 |
| 'ACSL3(c26)'                                                    | 754.50 |
| 'ACSL1(c26)'                                                    | 754.00 |
| 'SLC25A27(Mitochondrial Inner membrane)'                        | 752.50 |
| 'ACC2(cytosol)'                                                 | 752.50 |
| 'SLC25A14(Mitochondrial Inner membrane)'                        | 751.75 |
| 'Oxaloacetate(cytosol)'                                         | 751.50 |
| 'PINK1(Mitochondrial outer membrane)'                           | 748.50 |
| 'Autophagy induction(cytosol)'                                  | 748.00 |
| 'ATG1 kinase complex(cytosol)'                                  | 747.50 |
| 'ACSL4(c26)'                                                    | 746.50 |
| 'Arachidonate(cytosol)'                                         | 746.00 |
| 'TAG(cytosol)'                                                  | 744.50 |
| 'SAP-97(cytosol)'                                               | 743.25 |
| 'fatty acyl CoA(cytosol)'                                       | 743.00 |
| 'Protein target(cytosol)'                                       | 740.25 |
| 'misfolded transmembrane ER protein(cytosol)'                   | 738.75 |
| 'BAD(cytosol)'                                                  | 736.25 |
| 'HTRA2(Mitochondrial outer membrane)'                           | 736.25 |
| 'DNM1L(cytosol)'                                                | 736.25 |
| 'Electron Leakage at Complex III(Mitochondrial outer membrane)' | 734.00 |
| 'DNM1L(cytosol)'                                                | 732.75 |
| 'VCP:UBE4B(cytosol)'                                            | 732.00 |

|                                                   |        |
|---------------------------------------------------|--------|
| 'DNM1L(Mitochondrial outer membrane)'             | 730.50 |
| 'MAOB:FAD(Mitochondrial outer membrane)'          | 730.50 |
| 'ZNF746(cytosol)'                                 | 728.50 |
| 'Arachidonic acid(cytosol)'                       | 728.50 |
| 'DLG1(cytosol)'                                   | 727.50 |
| 'CPLX1(cytosol)'                                  | 727.25 |
| 'MYO6(cytosol)'                                   | 727.00 |
| 'Synapsin(cytosol)'                               | 726.25 |
| 'Misfolded protein propagation(default)'          | 724.00 |
| 'ACADM(Mitochondrial Inner membrane)'             | 723.50 |
| 'ECHS1(Mitochondrial Inner membrane)'             | 722.00 |
| 'NSF:NAPA(cytosol)'                               | 722.00 |
| 'Pi(Mitochondrial Inner membrane)'                | 721.50 |
| 'Glycine(default)'                                | 718.50 |
| 'Glycine(cytosol)'                                | 718.00 |
| 'L-Glutamate(cytosol)'                            | 717.50 |
| 'PGD2(cytosol)'                                   | 715.50 |
| '5-hydroxytryptamine N-methyl conjugate(cytosol)' | 713.50 |
| 'FOXO1(cytosol)'                                  | 708.00 |
| 'H2O (cytosol)'                                   | 705.50 |
| 'BDH1(Mitochondrial Inner membrane)'              | 703.25 |
| 'GTP(Mitochondrial Inner membrane)'               | 701.50 |
| 'DUB(cytosol)'                                    | 691.00 |
| 'PARK2(cytosol)'                                  | 685.00 |
| 'ELOVL6(c26)'                                     | 683.00 |
| 'ELOVL3(c26)'                                     | 682.50 |
| 'ELOVL2(c26)'                                     | 682.00 |
| 'ELOVL1(c26)'                                     | 681.50 |
| 'SLC25A20(Mitochondrial Inner membrane)'          | 680.50 |
| 'ACC1(cytosol)'                                   | 677.50 |
| 'ACADS(Mitochondrial Inner membrane)'             | 676.00 |
| 'ELOVL4(c26)'                                     | 676.00 |
| '3-oxocerotoyl-CoA(cytosol)'                      | 675.50 |
| 'tetracosanoyl-CoA(cytosol)'                      | 675.00 |

|                                                              |        |
|--------------------------------------------------------------|--------|
| 'ELOVL7(c26)'                                                | 674.50 |
| '3-oxobehenoyl-CoA(cytosol)'                                 | 674.00 |
| 'arachidoyl-CoA(cytosol)'                                    | 673.50 |
| 'ELOVL5(c26)'                                                | 673.00 |
| '3-oxo-(7-10-13-16)-docosatetraenoyl-CoA(cytosol)'           | 672.50 |
| 'HCO3-(cytosol)'                                             | 669.50 |
| 'PARK2(cytosol)'                                             | 666.00 |
| 'AKR1B1(cytosol)'                                            | 664.50 |
| 'UPS(cytosol)'                                               | 663.00 |
| 'ACAT1(Mitochondrial Inner membrane)'                        | 661.00 |
| 'misfolded protein(cytosol)'                                 | 655.00 |
| 'OH-(cytosol)'                                               | 652.00 |
| 'Carnitine(Mitochondrial outer membrane)'                    | 651.50 |
| 'L-Palmitoylcarnitine(Mitochondrial outer membrane)'         | 651.00 |
| 'SIRT3(Mitochondrial Inner membrane)'                        | 648.50 |
| 'FAD2(Mitochondrial Inner membrane)'                         | 648.00 |
| 'propionyl-CoA(Mitochondrial Inner membrane)'                | 647.50 |
| 'VIM (fragment 2-466)(cytosol)'                              | 647.25 |
| 'DHAP(Mitochondrial Inner membrane)'                         | 646.00 |
| 'ATP-dependent unfoldase(cytosol)'                           | 645.00 |
| 'Acetaldehyde(Mitochondrial Inner membrane)'                 | 641.00 |
| 'ADP(Mitochondrial outer membrane)'                          | 637.00 |
| 'GDP(Mitochondrial Inner membrane)'                          | 636.50 |
| 'OH-(Mitochondrial Inner membrane)'                          | 633.50 |
| 'H_sub_2_endsub_O(Mitochondrial Inner membrane)'             | 632.00 |
| 'PDK1(cytosol)'                                              | 630.00 |
| '5-Hydroxyindole acetic acid(Mitochondrial Inner membrane)'  | 629.50 |
| '5-hydroxyindole acetaldehyde(Mitochondrial Inner membrane)' | 629.00 |
| 'Excess of _alpha_-synuclein(cytosol)'                       | 628.00 |
| 'S-adenosylhomocysteine (cytosol)'                           | 627.50 |
| 'CO2 (cytosol)'                                              | 626.50 |
| 'Tetrahydrobiopterin (cytosol)'                              | 626.00 |
| 'Oxygen (cytosol)'                                           | 625.50 |
| 'L-Tyrosine (cytosol)'                                       | 625.00 |

|                                                       |        |
|-------------------------------------------------------|--------|
| 'DOPET(cytosol)'                                      | 624.50 |
| 'ALDH2(Mitochondrial Inner membrane)'                 | 622.50 |
| 'ALDH3A1(cytosol)'                                    | 617.00 |
| 'NDUFS3(cytosol)'                                     | 614.25 |
| 'Synaptic transmission dysfunction(default)'          | 614.00 |
| 'HMGCL(Mitochondrial Inner membrane)'                 | 613.00 |
| 'BPGM(cytosol)'                                       | 612.50 |
| 'phagocytosis(microglia)'                             | 610.25 |
| 'tublin beta(cytosol)'                                | 606.75 |
| 'Trifunctional Protein(Mitochondrial Inner membrane)' | 606.00 |
| 'SNCA (Ala53Thr)(cytosol)'                            | 605.75 |
| 'SNCA (Ala30Pro)(cytosol)'                            | 605.25 |
| 'PTGS1(cytosol)'                                      | 600.75 |
| 'NADH/NAD+ ratio(Mitochondrial Inner membrane)'       | 600.50 |
| 'SNCA(Docked DA loaded synaptic vesicle)'             | 598.25 |
| 'BCL2(cytosol)'                                       | 597.50 |
| 'EIF4EBP1(cytosol)'                                   | 595.25 |
| 'VDAC1(Mitochondrial outer membrane)'                 | 594.50 |
| 'LRRK2(cytosol)'                                      | 593.75 |
| 'STK25(cytosol)'                                      | 592.75 |
| 'STK24(cytosol)'                                      | 591.75 |
| 'STK3(cytosol)'                                       | 590.75 |
| 'H+(default)'                                         | 590.00 |
| 'TAOK3(cytosol)'                                      | 589.75 |
| 'RDX(cytosol)'                                        | 588.25 |
| 'EZR(cytosol)'                                        | 586.75 |
| 'MSN(cytosol)'                                        | 586.25 |
| 'UBE4A:VCP(cytosol)'                                  | 583.25 |
| 'SNCA(cytosol)'                                       | 582.25 |
| 'GPAT2(Mitochondrial outer membrane)'                 | 581.75 |
| 'GPAM(Mitochondrial outer membrane)'                  | 581.25 |
| 'GK(cytosol)'                                         | 580.75 |
| 'GDP1(cytosol)'                                       | 580.25 |
| 'Glycerol(cytosol)'                                   | 579.75 |

|                                                              |        |
|--------------------------------------------------------------|--------|
| 'DHAP(cytosol)'                                              | 579.25 |
| 'AGPAT5(c26)'                                                | 576.25 |
| 'AGPAT4(c26)'                                                | 575.75 |
| 'AGPAT3(c26)'                                                | 575.25 |
| 'AGPAT2(c26)'                                                | 574.75 |
| 'AGPAT1(c26)'                                                | 574.25 |
| 'AGPAT9(c26)'                                                | 573.75 |
| 'AGPAT6(c26)'                                                | 573.25 |
| 'TECR(c26)'                                                  | 572.75 |
| '3-hydroxyacyl-CoA dehydratase(c26)'                         | 571.75 |
| 'HSD17B12(c26)'                                              | 571.25 |
| 'ACC2(cytosol)'                                              | 566.25 |
| 'DGAT2(c26)'                                                 | 558.75 |
| 'DGAT1(c26)'                                                 | 558.25 |
| 'TARP-PSD95-Mdm2(cytosol)'                                   | 557.25 |
| 'CaMKII(cytosol)'                                            | 556.75 |
| 'PARK2:HSP70(cytosol)'                                       | 554.75 |
| 'PARK2:UbcH7(cytosol)'                                       | 554.25 |
| 'pharmacological stimulations of synaptic activity(cytosol)' | 554.00 |
| 'ALDH9A1(cytosol)'                                           | 551.75 |
| 'ALDH1A1(cytosol)'                                           | 551.25 |
| 's4933(cytosol)'                                             | 550.25 |
| 'ubiquitin-interacting vesicle protein:VCP(cytosol)'         | 548.75 |
| 'succinyl CoA/CoA ratio(Mitochondrial Inner membrane)'       | 548.50 |
| 'clathrin:VCP(cytosol)'                                      | 548.25 |
| 'proteasome:VCP(cytosol)'                                    | 547.75 |
| 'ATP/ADP ratio(Mitochondrial Inner membrane)'                | 547.50 |
| 'ubiquitin-binding adaptor:VCP(cytosol)'                     | 547.25 |
| 'ataxin 3:VCP(cytosol)'                                      | 546.75 |
| 'ADHFE1(Mitochondrial Inner membrane)'                       | 546.00 |
| 'Jacob:caldendrin(cytosol)'                                  | 545.75 |
| 'GAPDH(cytosol)'                                             | 545.50 |
| '14-3-3 sigma:Bax(cytosol)'                                  | 545.25 |
| '14-3-3 zeta:Bax(cytosol)'                                   | 544.75 |



|                                                       |        |
|-------------------------------------------------------|--------|
| 'extracellular alpha cynuclein(default)'              | 544.00 |
| 'unidentified caspase acting on Occludin(cytosol)'    | 543.25 |
| 'AKR1A1(cytosol)'                                     | 543.00 |
| 'AMPA receptors containing GluR2 (homomers)(cytosol)' | 542.50 |
| 'OXCT1(Mitochondrial Inner membrane)'                 | 542.00 |
| 'MAPK13(cytosol)'                                     | 542.00 |
| 'PC(Mitochondrial Inner membrane)'                    | 541.50 |
| 'GCK(cytosol)'                                        | 541.00 |
| 'MAPK12(cytosol)'                                     | 541.00 |
| 'NO(default)'                                         | 540.75 |
| 'HK1(cytosol)'                                        | 540.50 |
| 'Pi(cytosol)'                                         | 540.00 |
| 'MAPK11(cytosol)'                                     | 540.00 |
| 'ALDOA(cytosol)'                                      | 539.00 |
| 'GSK3B(cytosol)'                                      | 539.00 |
| 'Citrate(Mitochondrial outer membrane)'               | 538.25 |
| '(S)-Malate(Mitochondrial outer membrane)'            | 537.75 |
| 'GPI(cytosol)'                                        | 537.50 |
| 'HSPA8(cytosol)'                                      | 537.00 |
| 'PGF2 alpha(cytosol)'                                 | 535.00 |
| 'G3P(Mitochondrial Inner membrane)'                   | 534.25 |
| 'HPGDS(cytosol)'                                      | 534.00 |
| 'PTGDS(cytosol)'                                      | 533.00 |
| 'PTGES3(cytosol)'                                     | 531.50 |
| 'PTGES(cytosol)'                                      | 530.50 |
| 'PTGES2(cytosol)'                                     | 529.50 |
| 'Acetyl-CoA (cytosol)'                                | 529.25 |
| 'Arachidonic Acid(cytosol)'                           | 527.50 |
| 'PTGS2(Nucleus)'                                      | 526.50 |
| 'ATP(cytosol)'                                        | 525.75 |
| 'BMF(Mitochondrial outer membrane)'                   | 525.50 |
| 'ADP(cytosol)'                                        | 525.25 |
| 's5073(cytosol)'                                      | 523.50 |
| 'ATP (Mitochondrial Inner membrane)'                  | 522.75 |

|                                                    |        |
|----------------------------------------------------|--------|
| 'VAMP2(DA loaded synaptic vesicle)'                | 522.00 |
| 'CSP:Hsc70:SGT(Docked DA loaded synaptic vesicle)' | 521.00 |
| 'oxygen(Mitochondrial Inner membrane)'             | 520.25 |
| 'caspase-3(cytosol)'                               | 519.50 |
| 'EIF4EBP1(cytosol)'                                | 519.00 |
| 'caspase-6(Nucleus)'                               | 518.75 |
| 'PRKCZ(cytosol)'                                   | 518.00 |
| 'S-adenosylmethionine (cytosol)'                   | 515.75 |
| 'STK25(cytosol)'                                   | 515.50 |
| 'STK24(cytosol)'                                   | 514.00 |
| 'STK3(cytosol)'                                    | 512.50 |
| 'TAOK3(cytosol)'                                   | 511.00 |
| 'COMT(cytosol)'                                    | 510.00 |
| 'tublin beta(cytosol)'                             | 510.00 |
| 'RDX(cytosol)'                                     | 508.50 |
| 'EZR(cytosol)'                                     | 507.50 |
| 'Mixothiazol(Mitochondrial Inner membrane)'        | 506.50 |
| 'MSN(cytosol)'                                     | 505.50 |
| 'MPTP(cytosol)'                                    | 504.50 |
| 'GRIN2B(cytosol)'                                  | 503.00 |
| 'GRIN2A(cytosol)'                                  | 502.00 |
| 'PRDX4(Mitochondrial Inner membrane)'              | 501.75 |
| 'a24_degraded(cytosol)'                            | 501.50 |
| 'BCAP31(ER)'                                       | 501.00 |
| 'PRDX4(cytosol)'                                   | 500.75 |
| 'CAMK2A(cytosol)'                                  | 500.50 |
| 'TXNRD1(cytosol)'                                  | 500.25 |
| 'CAT(cytosol)'                                     | 499.75 |
| 'GPX1(cytosol)'                                    | 499.25 |
| 'GSR(cytosol)'                                     | 498.75 |
| 'GAS2 (fragment 1-279)(cytosol)'                   | 498.50 |
| 'GPX4(cytosol)'                                    | 498.25 |
| 'GAS2 (fragment 280-313)(cytosol)'                 | 498.00 |
| 'TXNRD2(cytosol)'                                  | 497.75 |

|                                         |        |
|-----------------------------------------|--------|
| 'PRDX1(cytosol)'                        | 497.25 |
| 'PRDX2(cytosol)'                        | 496.75 |
| 'VIM (fragment 2-85)(cytosol)'          | 496.50 |
| 'PRDX3(cytosol)'                        | 496.25 |
| 'VIM (fragment 86-466)(cytosol)'        | 496.00 |
| 'PRDX5(cytosol)'                        | 495.75 |
| 'HSP70(cytosol)'                        | 495.25 |
| 'LPIN3(c26)'                            | 495.00 |
| 'ACADVL(Mitochondrial Inner membrane)'  | 494.75 |
| 'CPT2(Mitochondrial Inner membrane)'    | 494.25 |
| 'LPIN2(c26)'                            | 494.00 |
| 'CPT1A(Mitochondrial Inner membrane)'   | 493.25 |
| 'LPIN1(c26)'                            | 493.00 |
| 'CPT1B(Mitochondrial Inner membrane)'   | 492.75 |
| 'GPD2(Mitochondrial Inner membrane)'    | 491.75 |
| 'SLC25A1(Mitochondrial Inner membrane)' | 491.25 |
| 'DCI(Mitochondrial Inner membrane)'     | 490.75 |
| 'DECR1(Mitochondrial Inner membrane)'   | 488.25 |
| 'MFN2(cytosol)'                         | 487.75 |
| 'MFN1(cytosol)'                         | 487.25 |
| 'Caspase-8(cytosol)'                    | 485.50 |
| 'SLC6A3(cytosol)'                       | 484.75 |
| 'FUBP1(cytosol)'                        | 484.25 |
| 'SYT11(cytosol)'                        | 483.25 |
| 'MFN2(Mitochondrial outer membrane)'    | 481.75 |
| 'MFN1(Mitochondrial outer membrane)'    | 481.25 |
| 'SLC6A3(cytosol)'                       | 480.75 |
| 'SIM2(cytosol)'                         | 480.25 |
| 'AIMP2(cytosol)'                        | 479.75 |
| 'RANBP2(cytosol)'                       | 479.25 |
| 'cyclin-E(cytosol)'                     | 478.75 |
| '?-tubulin(cytosol)'                    | 478.25 |
| 'GPR37(cytosol)'                        | 477.25 |
| 'Sep-05(cytosol)'                       | 476.75 |

|                                                         |        |
|---------------------------------------------------------|--------|
| '?-tublin(cytosol)'                                     | 476.25 |
| 'lactate dehydrogenase B4 complex(cytosol)'             | 471.50 |
| 'LAMP2(Lysosome)'                                       | 471.50 |
| 'SNCAIP(cytosol)'                                       | 471.25 |
| 'CAMKK2(cytosol)'                                       | 470.50 |
| 'lactate dehydrogenase A2B2 complex(cytosol)'           | 468.00 |
| 'K+(Mitochondrial outer membrane)'                      | 468.00 |
| 'PPP2CB(cytosol)'                                       | 467.00 |
| 'dexamethasone(cytosol)'                                | 464.00 |
| 'VCP (R115H)(cytosol)'                                  | 463.75 |
| 'Bcl-2:BH-3 only proteins(cytosol)'                     | 463.50 |
| 'VCP (mutated)(cytosol)'                                | 463.25 |
| 'lactate dehydrogenase A4 complex(cytosol)'             | 463.00 |
| 'lactate dehydrogenase AB3 complex(cytosol)'            | 462.50 |
| 'lactate dehydrogenase A3B complex(cytosol)'            | 462.00 |
| 'Rotenone(Mitochondrial Inner membrane)'                | 460.50 |
| 'LRRK2(cytosol)'                                        | 460.25 |
| 'HSP40:HSP70(cytosol)'                                  | 459.50 |
| 'unidentified caspase acting on Plakophilin 1(cytosol)' | 455.50 |
| 'unidentified caspase acting on ZO-1(cytosol)'          | 454.50 |
| 'unidentified caspase acting on Desmoplakin(cytosol)'   | 453.50 |
| 'Name unidentified caspase acting on ZO-2 (cytosol)'    | 452.50 |
| 'Jacob(cytosol)'                                        | 451.75 |
| 'PGE2(default)'                                         | 451.00 |
| 'SLC16A8:BSG(cytosol)'                                  | 450.50 |
| 'SLC16A1:BSG(cytosol)'                                  | 450.00 |
| 'SLC16A3:BSG(cytosol)'                                  | 449.50 |
| 'SNCA(cytosol)'                                         | 449.50 |
| '(S)-Malate(Mitochondrial Inner membrane)'              | 443.50 |
| 'cAMP(cytosol)'                                         | 442.00 |
| 'GLUD1(Mitochondrial Inner membrane)'                   | 439.25 |
| 'PFKM(cytosol)'                                         | 437.25 |
| 'PGK1(cytosol)'                                         | 436.75 |
| 'GALM(cytosol)'                                         | 435.75 |

|                                                                           |        |
|---------------------------------------------------------------------------|--------|
| 'PGM1(cytosol)'                                                           | 435.25 |
| 'PFKL(cytosol)'                                                           | 434.25 |
| 'TPI1(cytosol)'                                                           | 433.75 |
| 'Caspase-7(cytosol)'                                                      | 433.00 |
| 'PGAM4(cytosol)'                                                          | 432.75 |
| 'ENO1(cytosol)'                                                           | 432.25 |
| 'PKLR(cytosol)'                                                           | 431.75 |
| 'Thiol reductants(Mitochondrial outer membrane)'                          | 431.50 |
| 'ADH1A(cytosol)'                                                          | 431.25 |
| 'ATP(Mitochondrial outer membrane)'                                       | 430.50 |
| 'O2(Mitochondrial outer membrane)'                                        | 429.00 |
| 'malate dehydrogenase 2(Mitochondrial Inner membrane)'                    | 426.00 |
| 'Free Fatty Acid(Mitochondrial outer membrane)'                           | 426.00 |
| 'Purine Nucleotide(Mitochondrial outer membrane)'                         | 425.00 |
| 'RIMS1(cytosol)'                                                          | 424.75 |
| 'Tyrosine 3-monooxygenase (Fe2+ cofactor)(cytosol)'                       | 424.50 |
| 'Lysosome(cytosol)'                                                       | 423.00 |
| 'isocitrate dehydrogenase 3 complex(Mitochondrial Inner membrane)'        | 422.50 |
| 'mtDNA deletion(Mitochondrial Inner membrane)'                            | 422.00 |
| 'mtDNA mutations(Mitochondrial Inner membrane)'                           | 421.50 |
| 'Acetyl-CoA/CoA(Mitochondrial Inner membrane)'                            | 420.50 |
| 'NADH/NAD+(Mitochondrial Inner membrane)'                                 | 420.00 |
| 'alpha-ketoglutarate dehydrogenase complex(Mitochondrial Inner membrane)' | 419.00 |
| 'XIAP(cytosol)'                                                           | 418.00 |
| 'Na+ (cytosol)'                                                           | 417.00 |
| 'PARL(Mitochondrial outer membrane)'                                      | 417.00 |
| 'HTRA2(Mitochondrial outer membrane)'                                     | 416.00 |
| 'H+ (Mitochondrial Inner membrane)'                                       | 415.50 |
| 'iNOS(astrocyte)'                                                         | 415.00 |
| 'Ca2+(default)'                                                           | 414.50 |
| 'FASL(default)'                                                           | 414.00 |
| 'SFN(cytosol)'                                                            | 413.75 |
| 'YWHAZ(cytosol)'                                                          | 413.25 |
| 'FASL(astrocyte)'                                                         | 413.00 |

|                                        |        |
|----------------------------------------|--------|
| 'IL6(default)'                         | 412.00 |
| 'IL6(microglia)'                       | 411.00 |
| 'NADPH oxidase(astrocyte)'             | 410.00 |
| 'NADPH oxidase(microglia)'             | 409.00 |
| 'CLSPN (fragment 1-1072)(Nucleus)'     | 408.75 |
| 'CLSPN(Nucleus)'                       | 408.25 |
| 'IL1B(microglia)'                      | 408.00 |
| 'DBNL (fragment 1-361)(cytosol)'       | 407.25 |
| 'IL1B(astrocyte)'                      | 407.00 |
| 'DBNL (fragment 362-431)(cytosol)'     | 406.75 |
| 'GSN (fragment 27-403)(cytosol)'       | 406.25 |
| 'TNF(astrocyte)'                       | 406.00 |
| 'GSN (fragment 404-782)(cytosol)'      | 405.75 |
| 'MAPT (fragment 2-421)(cytosol)'       | 405.25 |
| 'PKAc(cytosol)'                        | 405.00 |
| 'MAPT (fragment 422-758)(cytosol)'     | 404.75 |
| 'CTNNB1 (fragment 1-115)(cytosol)'     | 404.25 |
| 'NFKB1(cytosol)'                       | 404.00 |
| 'CTNNB1 (fragment 116-376)(cytosol)'   | 403.75 |
| 'BMX (fragment 1-242)(cytosol)'        | 403.25 |
| 'RELA(cytosol)'                        | 403.00 |
| 'BMX (fragment 243-675)(cytosol)'      | 402.75 |
| 'MST4 (fragment 1-305)(cytosol)'       | 402.25 |
| 'NFKBIA(cytosol)'                      | 402.00 |
| 'MST4 (fragment 306-416)(cytosol)'     | 401.75 |
| 'DBNL(cytosol)'                        | 401.25 |
| 'BTRC(cytosol)'                        | 401.00 |
| 'GSN(cytosol)'                         | 400.75 |
| 'BMX(cytosol)'                         | 400.25 |
| 'ACADL(Mitochondrial Inner membrane)'  | 400.00 |
| 'MST4(cytosol)'                        | 399.75 |
| 'SPTAN1 (fragment 1186-2472)(cytosol)' | 399.25 |
| 'SPTAN1(cytosol)'                      | 398.75 |
| 'SOD1(cytosol)'                        | 398.50 |

|                                       |        |
|---------------------------------------|--------|
| 'SPTAN1 (fragment 1-1185)(cytosol)'   | 398.25 |
| 'ACIN1 (fragment 1094-1341)(cytosol)' | 397.75 |
| 'ACIN1(cytosol)'                      | 397.25 |
| 'ACIN1 (fragment 1-1093)(cytosol)'    | 396.75 |
| 'ADD1 (fragment 1-633)(cytosol)'      | 396.25 |
| 'ADD1(cytosol)'                       | 395.75 |
| 'ADD1 (fragment 634-737)(cytosol)'    | 395.25 |
| 'PAK2 (fragment 1-212)(cytosol)'      | 394.75 |
| 'PRKCD(cytosol)'                      | 394.25 |
| 'PRKCD (fragment 1-329)(cytosol)'     | 393.75 |
| 'PRKCD (fragment 330-676)(cytosol)'   | 393.25 |
| 'PAK2(cytosol)'                       | 392.75 |
| 'PRKCQ(cytosol)'                      | 392.25 |
| 'PRKCQ (fragment 1-354)(cytosol)'     | 391.75 |
| 'FNNTA (fragment 60-379)(cytosol)'    | 391.25 |
| 'BCAP31 (fragment 165-237)(ER)'       | 390.75 |
| 'BCAP31 (fragment 238-246)(ER)'       | 390.25 |
| 'FNNTA(cytosol)'                      | 389.75 |
| 'FNNTA (fragment 1-59)(cytosol)'      | 389.25 |
| 'MCEE(Mitochondrial Inner membrane)'  | 389.00 |
| 'ROCK1(cytosol)'                      | 388.25 |
| 'ROCK1 (fragment 1114-1354)(cytosol)' | 387.75 |
| 'BIRC2(cytosol)'                      | 387.25 |
| 'BIRC2 (fragment 373-618)(cytosol)'   | 386.75 |
| 'BIRC2 (fragment 1-372)(cytosol)'     | 385.25 |
| 'GAS2(cytosol)'                       | 384.75 |
| 's4503(Mitochondrial Inner membrane)' | 383.50 |
| 'PLEC (fragment 2396-4684)(cytosol)'  | 383.25 |
| 's253(cytosol)'                       | 383.00 |
| 'PMPCA(Mitochondrial Inner membrane)' | 383.00 |
| 's252(cytosol)'                       | 382.50 |
| 'VIM (fragment 2-429)(cytosol)'       | 382.25 |
| 's251(cytosol)'                       | 382.00 |
| 'PINK1(cytosol)'                      | 382.00 |

|                                                                    |        |
|--------------------------------------------------------------------|--------|
| 'VIM (fragment 430-466)(cytosol)'                                  | 381.75 |
| 's250(cytosol)'                                                    | 381.50 |
| 'SATB1 (fragment 255-763)(Nucleus)'                                | 381.25 |
| 'PARL(Mitochondrial Inner membrane)'                               | 381.00 |
| 'LMNB1 fragment (232-586)(Nucleus)'                                | 380.75 |
| 'SATB1(Nucleus)'                                                   | 380.25 |
| 'importin-?(Nucleus)'                                              | 380.00 |
| 'LMNA (fragment 231-664)(Nucleus)'                                 | 379.75 |
| 'LMNB1(Nucleus)'                                                   | 379.25 |
| 'LMNA(Nucleus)'                                                    | 378.75 |
| 'DSG3 (fragment 50-781)(cytosol)'                                  | 378.25 |
| 'FUBP1(cytosol)'                                                   | 378.00 |
| 'OCLN (fragment 1-320)(cytosol)'                                   | 377.75 |
| 'OCLN (fragment 321-522)(cytosol)'                                 | 377.25 |
| 'OCLN(cytosol)'                                                    | 376.75 |
| 'MUL1(Mitochondrial outer membrane)'                               | 376.50 |
| 'PKP1 (fragmented)(cytosol)'                                       | 375.75 |
| 'Calcinuerin(cytosol)'                                             | 375.50 |
| 'DSG1 (fragment 889-1049)(cytosol)'                                | 375.25 |
| 'DSG3(cytosol)'                                                    | 374.75 |
| 'TJP2 (fragment)(cytosol)'                                         | 373.75 |
| 'propionyl-CoA carboxylase protomer(Mitochondrial Inner membrane)' | 373.50 |
| 'DSP (fragment)(cytosol)'                                          | 372.75 |
| 'TJP1 (fragment)(cytosol)'                                         | 371.75 |
| 'DSG1(cytosol)'                                                    | 371.25 |
| 'CASP9(cytosol)'                                                   | 370.75 |
| 'GPR37(cytosol)'                                                   | 370.50 |
| 'CASP9(cytosol)'                                                   | 370.25 |
| 'RANBP2(cytosol)'                                                  | 368.00 |
| 'SLC6A3(cytosol)'                                                  | 367.00 |
| 'SIM2(cytosol)'                                                    | 366.00 |
| 'AIMP2(cytosol)'                                                   | 365.00 |
| 'cyclin-E(cytosol)'                                                | 364.00 |
| 'TP53(Nucleus)'                                                    | 363.75 |



|                                                                   |        |
|-------------------------------------------------------------------|--------|
| '?-tubulin(cytosol)'                                              | 363.00 |
| 'Succinyl-CoA ligase(Mitochondrial Inner membrane)'               | 362.50 |
| 'PRDX5(Mitochondrial Inner membrane)'                             | 362.25 |
| '?-tublin(cytosol)'                                               | 362.00 |
| 'PRDX3(Mitochondrial Inner membrane)'                             | 361.75 |
| 'PRDX2(Mitochondrial Inner membrane)'                             | 361.25 |
| 'Sep-05(cytosol)'                                                 | 361.00 |
| 'PRDX1(Mitochondrial Inner membrane)'                             | 360.75 |
| 'GPX1(Mitochondrial Inner membrane)'                              | 360.25 |
| 'PARK7(cytosol)'                                                  | 360.00 |
| 'mitochondrial pyruvate carrier(Mitochondrial outer membrane)'    | 358.75 |
| 'SNCAIP(cytosol)'                                                 | 358.50 |
| 'PDK3 (Mitochondrial Inner membrane)'                             | 358.25 |
| 'PDK1 (Mitochondrial Inner membrane)'                             | 357.75 |
| 'UbcH7(cytosol)'                                                  | 357.50 |
| 'GSR(Mitochondrial Inner membrane)'                               | 357.25 |
| 'GPX4(Mitochondrial Inner membrane)'                              | 356.75 |
| 'caspase-7(cytosol)'                                              | 356.50 |
| 'AKAP150(cytosol)'                                                | 356.50 |
| 'SMAC:XIAP(cytosol)'                                              | 356.00 |
| 'TXNRD2(Mitochondrial Inner membrane)'                            | 355.75 |
| 'GRIP1(cytosol)'                                                  | 355.50 |
| 'CAT(Mitochondrial Inner membrane)'                               | 355.25 |
| 'actin(cytosol)'                                                  | 354.50 |
| 'BAG1(cytosol)'                                                   | 353.00 |
| 'Succinyl-CoA ligase(Mitochondrial Inner membrane)'               | 352.00 |
| 'DNAJB2(cytosol)'                                                 | 352.00 |
| 'STUB1(cytosol)'                                                  | 351.00 |
| 'ubiquitin-interactin vesicle proteins(cytosol)'                  | 350.00 |
| 'cytochrome c oxidase (complex IV)(Mitochondrial Inner membrane)' | 349.50 |
| 'clathrin(cytosol)'                                               | 349.00 |
| 'fumarate hydratase(Mitochondrial Inner membrane)'                | 348.50 |
| 'ubiquitin-binding adaptor(cytosol)'                              | 348.00 |
| 'NNT dimer(Mitochondrial Inner membrane)'                         | 346.50 |

|                                          |        |
|------------------------------------------|--------|
| 'UBE4A(cytosol)'                         | 346.50 |
| 'UBE4B(cytosol)'                         | 344.50 |
| 'misfolded transmembrane ER protein(ER)' | 343.50 |
| 'Doa10p(ER)'                             | 342.50 |
| 'ATXN3 (polyQ)(cytosol)'                 | 341.50 |
| 'ATXN3(cytosol)'                         | 340.50 |
| 'UCP3(Mitochondrial Inner membrane)'     | 339.25 |
| 'dynein(cytosol)'                        | 339.00 |
| 'UCP2(Mitochondrial Inner membrane)'     | 338.75 |
| 'misfolded PARK7(cytosol)'               | 338.00 |
| 'protein phosphatase 1(cytosol)'         | 337.00 |
| 'DSG3 (fragment 782-999)(cytosol)'       | 336.25 |
| 'DSG2 (70 Kd fragment)(cytosol)'         | 335.75 |
| 'chaperones(cytosol)'                    | 335.00 |
| 'ACO2(Mitochondrial Inner membrane)'     | 334.75 |
| 'DSG1 (fragment 50-888)(cytosol)'        | 334.25 |
| 'E4(cytosol)'                            | 334.00 |
| 'CDH1 (fragment 155-750)(cytosol)'       | 333.75 |
| 'CDH1 (fragment 751-882) (cytosol)'      | 333.25 |
| 'CAMK4(cytosol)'                         | 333.00 |
| 'CDH1(cytosol)'                          | 332.75 |
| 'L2HGDH(Mitochondrial Inner membrane)'   | 332.25 |
| 'CRTC1(cytosol)'                         | 332.00 |
| 'VIM (fragment 260-466)(cytosol)'        | 331.25 |
| 'CREBBP(Nucleus)'                        | 331.00 |
| 'VIM (fragment 2-259)(cytosol)'          | 330.75 |
| 'BCAP31 (fragment 2-164)(ER)'            | 330.25 |
| 'PRKACB(Nucleus)'                        | 330.00 |
| 'PLEC (fragment 1-2395)(cytosol)'        | 329.75 |
| 'PLEC(cytosol)'                          | 329.25 |
| 'PRKACA(Nucleus)'                        | 329.00 |
| 'LMNB1 (fragment 1-231)(Nucleus)'        | 328.75 |
| 'LMNA (fragment 1-230)(Nucleus)'         | 328.25 |
| 'PRKACG(Nucleus)'                        | 328.00 |

|                                            |        |
|--------------------------------------------|--------|
| 'SATB1 (fragment 1-254)(Nucleus)'          | 327.75 |
| 'CLSPN (fragment 1073-1332)(Nucleus)'      | 327.25 |
| 'ATF3(cytosol)'                            | 327.00 |
| 'BCL6(cytosol)'                            | 326.00 |
| 'PDK4 (Mitochondrial Inner membrane)'      | 325.75 |
| 'PDK2 (Mitochondrial Inner membrane)'      | 325.25 |
| 'BTG2(cytosol)'                            | 325.00 |
| 'CTNNB1(cytosol)'                          | 324.75 |
| 'PRKCQ (fragment 355-706)(cytosol)'        | 324.25 |
| 'ROCK1 (fragment 1-1113)(cytosol)'         | 323.75 |
| 'importin-?(cytosol)'                      | 323.50 |
| 'misfolded SNCA(default)'                  | 322.75 |
| 'GADD45B(cytosol)'                         | 322.50 |
| 'absorptive endocytosis(cytosol)'          | 322.25 |
| 'GADD45G(cytosol)'                         | 321.50 |
| 'high concentration of ?-nuclein(cytosol)' | 321.25 |
| 'CABP1(cytosol)'                           | 320.50 |
| 'NR4A1(cytosol)'                           | 319.50 |
| 'NPAS4(cytosol)'                           | 318.50 |
| 'SERPINB2(cytosol)'                        | 317.50 |
| 'shuttling factors(cytosol)'               | 317.25 |
| 'diffusion(cytosol)'                       | 316.75 |
| 'INHBA(cytosol)'                           | 316.50 |
| 'RPS6KA1(Nucleus)'                         | 315.50 |
| 'RPS6KA2(Nucleus)'                         | 314.50 |
| 'NOS(Mitochondrial Inner membrane)'        | 313.75 |
| 'RPS6KA3(Nucleus)'                         | 313.50 |
| 'RPS6KA6(Nucleus)'                         | 312.50 |
| 'AMP/ATP ratio(cytosol)'                   | 312.25 |
| 'Maturing Phagopore(cytosol)'              | 311.75 |
| 'RPS6KA3(cytosol)'                         | 311.50 |
| 'RPS6KA6(cytosol)'                         | 310.50 |
| 'Phagophore(cytosol)'                      | 310.25 |
| 'RPS6KA2(cytosol)'                         | 309.50 |

|                                        |        |
|----------------------------------------|--------|
| 'RPS6KA1(cytosol)'                     | 308.50 |
| 'CALM1(cytosol)'                       | 307.00 |
| 'Mg2+(default)'                        | 305.75 |
| 'Na+ (default)'                        | 305.25 |
| 'GLUD1(Mitochondrial Inner membrane)'  | 303.50 |
| 'K+(Mitochondrial Inner membrane)'     | 302.75 |
| 'Mg++ (Mitochondrial Inner membrane)'  | 301.75 |
| 'HMGCS2(Mitochondrial Inner membrane)' | 301.50 |
| 'ACSS1(Mitochondrial Inner membrane)'  | 300.50 |
| 'G6PC(cytosol)'                        | 298.50 |
| 'FBP1(cytosol)'                        | 296.50 |
| 'ACSS2(cytosol)'                       | 288.50 |
| 'GBA(Lysosome)'                        | 285.00 |
| 'MICU1(Mitochondrial Inner membrane)'  | 284.00 |
| 'HDAC6(cytosol)'                       | 283.00 |
| 'SQSTM1(cytosol)'                      | 282.00 |
| 'STK11 (cytosol)'                      | 281.00 |
| 'PE(cytosol)'                          | 280.00 |
| 'MAP1LC3A(cytosol)'                    | 279.00 |
| 'ZNF746(Nucleus)'                      | 278.00 |
| 'ZNF746(cytosol)'                      | 277.00 |
| 'proteasome inhibitor(cytosol)'        | 276.75 |
| 'PAK2 (p34)(Nucleus)'                  | 276.00 |
| 'CYCS(Mitochondrial Inner membrane)'   | 275.00 |
| 'Rapamycin(cytosol)'                   | 274.75 |
| 'SOD2(Mitochondrial Inner membrane)'   | 274.00 |
| 'PPARGC1A(Nucleus)'                    | 273.00 |
| 's4881(cytosol)'                       | 272.25 |
| 'ESRRA(Nucleus)'                       | 272.00 |
| 'MAP1LC3A (LC3-I)(cytosol)'            | 271.00 |
| 'PIK3R4(cytosol)'                      | 270.00 |
| 'PIK3C3(cytosol)'                      | 269.00 |
| 's183(cytosol)'                        | 268.75 |
| 'OPA1(Mitochondrial Inner membrane)'   | 268.00 |

|                                                               |        |
|---------------------------------------------------------------|--------|
| 's2319(cytosol)'                                              | 267.75 |
| 'MTOR(cytosol)'                                               | 267.00 |
| 'XRCC6(cytosol)'                                              | 266.00 |
| 'DNM1L(Mitochondrial outer membrane)'                         | 265.00 |
| 'CASP8(cytosol)'                                              | 263.00 |
| 'MAP2K6(cytosol)'                                             | 262.00 |
| 'MAP2K3(cytosol)'                                             | 261.00 |
| 'PPP5C(cytosol)'                                              | 260.00 |
| 'ATG1 kinase complex(cytosol)'                                | 259.75 |
| 'ATG1 kinase complex(cytosol)'                                | 259.25 |
| 'TRAF6(cytosol)'                                              | 259.00 |
| 'ubiquitin-VCP complex(cytosol)'                              | 258.75 |
| 'TORC2:14-3-3(cytosol)'                                       | 258.25 |
| 'TRAF2(cytosol)'                                              | 258.00 |
| 'NMDA receptor complex(cytosol)'                              | 257.75 |
| 'DFFA (fragment 225-331)(Nucleus)'                            | 257.00 |
| 'DFFA (fragment 1-117)(Nucleus)'                              | 256.00 |
| 'BCL2:VDAC1(Mitochondrial outer membrane)'                    | 254.75 |
| 'Ku70:BAX complex(cytosol)'                                   | 251.25 |
| 'Thioredoxin:ASK1(cytosol)'                                   | 250.75 |
| 'HMGB1/HMGB2- bound chromatin(Nucleus)'                       | 249.25 |
| 'APC(cytosol)'                                                | 247.25 |
| 'APC fragment(1-777)(cytosol)'                                | 246.75 |
| 'Calcineurin B complex(cytosol)'                              | 242.75 |
| 'Bcl2:BH3-only protein complex(Mitochondrial outer membrane)' | 242.25 |
| 'phospho-dynein(DLC1) on microtubules(cytosol)'               | 241.25 |
| 'BMF sequestered to dynein (DLC2)(cytosol)'                   | 240.75 |
| 'phospho-dynein(DLC2) on microtubules(cytosol)'               | 240.25 |
| 'PDP1 complex(Mitochondrial Inner membrane)'                  | 238.75 |
| 'F0F1-ATP synthase (complex V)(Mitochondrial Inner membrane)' | 236.75 |
| 'PDP2 complex(Mitochondrial Inner membrane)'                  | 235.25 |
| 'BAD:BCL-2(Mitochondrial outer membrane)'                     | 233.25 |
| 'caspase-6(cytosol)'                                          | 232.75 |
| 'BIM sequestered to dynein (DLC1)(cytosol)'                   | 231.75 |

|                                                             |        |
|-------------------------------------------------------------|--------|
| 'DP-1:E2F1 complex(Nucleus)'                                | 231.25 |
| 'caspase-7(Nucleus)'                                        | 230.75 |
| 'Citrate Synthase Holoenzyme(Mitochondrial Inner membrane)' | 230.25 |
| 'DDC dimer (cytosol)'                                       | 228.25 |
| 'APC fragment(778-2483)(cytosol)'                           | 227.75 |
| 'PKP1(cytosol)'                                             | 222.50 |
| 'TJP2(cytosol)'                                             | 220.00 |
| 'DSP(cytosol)'                                              | 218.50 |
| 'TJP1(cytosol)'                                             | 217.00 |
| 'AKT1(cytosol)'                                             | 214.00 |
| 'CASP2(cytosol)'                                            | 213.00 |
| 'BID(cytosol)'                                              | 212.00 |
| 'CYCS(Mitochondrial outer membrane)'                        | 211.00 |
| 'DIABLO(Mitochondrial outer membrane)'                      | 210.00 |
| 'BCL2(Mitochondrial outer membrane)'                        | 209.00 |
| 'BBC3(Mitochondrial Inner membrane)'                        | 208.00 |
| 'PMAIP1(Mitochondrial Inner membrane)'                      | 207.00 |
| 'BCL2L11(Mitochondrial outer membrane)'                     | 206.00 |
| 'GZMB(cytosol)'                                             | 205.00 |
| 'AKT1 (cytosol)'                                            | 204.00 |
| 'SIRT5(Mitochondrial Inner membrane)'                       | 202.00 |
| 'D2HGDH(Mitochondrial Inner membrane)'                      | 198.00 |
| 'SOD1(Mitochondrial outer membrane)'                        | 194.00 |
| 'SLC25A5(Mitochondrial Inner membrane)'                     | 192.00 |
| 'SLC25A4(Mitochondrial Inner membrane)'                     | 191.00 |
| 'SLC25A14(cytosol)'                                         | 190.00 |
| 'SLC25A27(cytosol)'                                         | 189.00 |
| 'COX6A1(cytosol)'                                           | 188.00 |
| 'COX7C(cytosol)'                                            | 187.00 |
| 'SDHB(cytosol)'                                             | 186.00 |
| 'COX7A2(cytosol)'                                           | 185.00 |
| 'ATP5C1(cytosol)'                                           | 184.00 |
| 'COX7A1(cytosol)'                                           | 183.00 |
| 'SLC25A4(cytosol)'                                          | 181.50 |

|                                                        |        |
|--------------------------------------------------------|--------|
| 'SLC25A5(cytosol)'                                     | 180.50 |
| 'UQCRC1(cytosol)'                                      | 179.50 |
| 'ATP5A1(cytosol)'                                      | 178.50 |
| 'ATP5L(cytosol)'                                       | 177.50 |
| 'ATP5O(cytosol)'                                       | 176.50 |
| 'COX5B(cytosol)'                                       | 175.50 |
| 'COX7A2L(cytosol)'                                     | 174.50 |
| 'COX7B(cytosol)'                                       | 173.50 |
| 'NDUFB6(cytosol)'                                      | 172.50 |
| 'ATP5D(cytosol)'                                       | 171.50 |
| 'NDUFB3(cytosol)'                                      | 170.50 |
| 'NDUFC1(cytosol)'                                      | 169.50 |
| 'NDUFS5(cytosol)'                                      | 168.50 |
| 'SDHA(cytosol)'                                        | 167.50 |
| 'UQCRB(cytosol)'                                       | 166.50 |
| 'NDUFA8(cytosol)'                                      | 165.50 |
| 'NDUFAB1(cytosol)'                                     | 164.50 |
| 'NDUFB5(cytosol)'                                      | 163.50 |
| 'CACNA1D(cytosol)'                                     | 162.50 |
| 'SYT11(cytosol)'                                       | 160.50 |
| 'DSG2(cytosol)'                                        | 157.00 |
| 'NMT1 (cytosol)'                                       | 153.00 |
| 'DFFA (fragment 118-224)(Nucleus)'                     | 147.50 |
| 'APAF1(cytosol)'                                       | 146.50 |
| 'Starvation(cytosol)'                                  | 141.50 |
| 'KCl-induced depolarization(cytosol)'                  | 139.50 |
| 'ubiquitin positive aggregates(cytosol)'               | 138.50 |
| 'ERAD defect(cytosol)'                                 | 137.50 |
| 'inclusions of ubiquitinated TDP-43(cytosol)'          | 136.50 |
| 'IBMPFD(cytosol)'                                      | 135.50 |
| 'type 3 spinocerebellar ataxia(cytosol)'               | 134.50 |
| 'Carorie_br_restriction(Mitochondrial Inner membrane)' | 132.50 |
| 'Carbon fixation in photosynthetic organisms(cytosol)' | 131.50 |
| 'Amino Acids(cytosol)'                                 | 128.50 |

|                                      |        |
|--------------------------------------|--------|
| 'Amino acids(cytosol)'               | 127.50 |
| 'Calorie Restriction(Nucleus)'       | 125.50 |
| 'Ca2+(Mitochondrial outer membrane)' | 121.00 |
| 'Na+(default)'                       | 119.50 |
| 'Co2+(Mitochondrial Inner membrane)' | 116.50 |
| 'Mn2+(Mitochondrial Inner membrane)' | 113.50 |
| 'Zn2+(Mitochondrial Inner membrane)' | 112.50 |
| 'ATF3(Nucleus)'                      | 111.50 |
| 'BTG2(Nucleus)'                      | 110.50 |
| 'BCL6(Nucleus)'                      | 109.50 |
| 'GADD45B(Nucleus)'                   | 108.50 |
| 'GADD45G(Nucleus)'                   | 107.50 |
| 'INHBA(Nucleus)'                     | 106.50 |
| 'Npas4(Nucleus)'                     | 105.50 |
| 'Nr4a1(Nucleus)'                     | 104.50 |
| 'Serpinb 2(Nucleus)'                 | 103.50 |
| 'Bdnf(Nucleus)'                      | 102.50 |
| 'PPARGC1A(Nucleus)'                  | 101.50 |
| 'SIRT3(Nucleus)'                     | 100.50 |
| 'UQCRC1(Nucleus)'                    | 99.50  |
| 'UQCRB(Nucleus)'                     | 98.50  |
| 'SLC25A5(Nucleus)'                   | 97.50  |
| 'SLC25A4(Nucleus)'                   | 96.50  |
| 'SDHB(Nucleus)'                      | 95.50  |
| 'SDHA(Nucleus)'                      | 94.50  |
| 'NDUFS5(Nucleus)'                    | 93.50  |
| 'NDUFS3(Nucleus)'                    | 92.50  |
| 'NDUFC1(Nucleus)'                    | 91.50  |
| 'COX7A2(Nucleus)'                    | 90.50  |
| 'COX7A1(Nucleus)'                    | 89.50  |
| 'COX6A1(Nucleus)'                    | 88.50  |
| 'COX5B(Nucleus)'                     | 87.50  |
| 'ATP5O(Nucleus)'                     | 86.50  |
| 'ATP5L(Nucleus)'                     | 85.50  |



|                                              |       |
|----------------------------------------------|-------|
| 'ATP5D(Nucleus)'                             | 84.50 |
| 'ATP5C1(Nucleus)'                            | 83.50 |
| 'ATP5A1(Nucleus)'                            | 82.50 |
| 'COX7A2L(Nucleus)'                           | 81.50 |
| 'COX7B(Nucleus)'                             | 80.50 |
| 'COX7C(Nucleus)'                             | 79.50 |
| 'NDUFB5(Nucleus)'                            | 78.50 |
| 'NDUFB6(Nucleus)'                            | 77.50 |
| 'SLC25A14(Nucleus)'                          | 76.50 |
| 'SLC25A27(Nucleus)'                          | 75.50 |
| 'DNA(Nucleus)'                               | 74.50 |
| 'NDUFB3(Nucleus)'                            | 73.50 |
| 'NDUFAB1(Nucleus)'                           | 72.50 |
| 'NDUFA8(Nucleus)'                            | 71.50 |
| 'CYCS(Nucleus)'                              | 70.50 |
| 'CCCP(Mitochondrial Inner membrane)'         | 69.50 |
| 'GlcNAC(cytosol)'                            | 68.50 |
| 'WGA(cytosol)'                               | 67.50 |
| 'geldanamycin(cytosol)'                      | 66.50 |
| 'bicuculline(cytosol)'                       | 64.50 |
| 'paraquat(cytosol)'                          | 63.50 |
| 'CCCP(cytosol)'                              | 62.50 |
| 'Diazoxide(Mitochondrial outer membrane)'    | 61.00 |
| 's4898(cytosol)'                             | 59.00 |
| 's49(cytosol)'                               | 57.50 |
| 's2193(cytosol)'                             | 52.50 |
| 's1695(cytosol)'                             | 51.50 |
| 's1276(Nucleus)'                             | 50.50 |
| 's1275(Nucleus)'                             | 49.50 |
| 'PINK1:MAPK14(Mitochondrial outer membrane)' | 48.50 |
| 'IKK complex(cytosol)'                       | 47.50 |
| 'Casein Kinase 2(cytosol)'                   | 46.50 |
| 'MUT dimer(Mitochondrial Inner membrane)'    | 43.50 |
| 'TIM Complex(Mitochondrial Inner membrane)'  | 42.00 |

|                                                                                 |       |
|---------------------------------------------------------------------------------|-------|
| 'TOM complex(Mitochondrial outer membrane)'                                     | 41.00 |
| 'Ras:GDP(cytosol)'                                                              | 37.50 |
| 'SCF complex(cytosol)'                                                          | 35.00 |
| 'Acetylated isocitrate dehydrogenase(Mitochondrial Inner membrane)'             | 33.00 |
| 'Acetylated succinate dehydrogenase (complex II)(Mitochondrial Inner membrane)' | 32.00 |
| 'Acetylated NADH-Q oxireductase (complex I)(Mitochondrial Inner membrane)'      | 31.00 |
| 'Atg complex(cytosol)'                                                          | 29.50 |
| 'HMGB1/HMGB2(Nucleus)'                                                          | 27.00 |
| 'DFF45:DFF40 complex(Nucleus)'                                                  | 25.50 |
| 'Histone H1 bound chromatin DNA(Nucleus)'                                       | 24.50 |
| 'DFF cleaved DNA(Nucleus)'                                                      | 23.50 |
| 'PIDDsome(cytosol)'                                                             | 21.00 |
| 'XIAP:Caspase-9(cytosol)'                                                       | 20.00 |
| 'XIAP:Caspase-7(cytosol)'                                                       | 19.00 |
| 'XIAP:Caspase-3(cytosol)'                                                       | 17.00 |
| 'Caspase-8 dimer(cytosol)'                                                      | 15.00 |
