# Supplementary material for: Integrating Pathways of Parkinson's Disease in a Molecular Interaction Map
Source: PubMed Central journal article supplement — Mol Neurobiol. 2013 Jul 7;49(1):88–102. doi: 10.1007/s12035-013-8489-4 (PMC4153395; doi:10.1007/s12035-013-8489-4), 2013-07-07
Supplement: 12035_2013_8489_MOESM4_ESM.pdf [file 12035_2013_8489_MOESM4_ESM.pdf]

# **Network analysis of the PD map: Intermodular communication**

## **Integrating pathways of Parkinson's disease in a molecular interaction map**

### ***Molecular Neurobiology***

*Kazuhiro Fujita, Marek Ostaszewski, Yukiko Matsuoka, Samik Ghosh, Enrico Glaab, Christophe Trefois, Isaac Crespo, Thanneer M. Perumal, Wiktor Jurkowski, Paul MA Antony, Nico Diederich, Manuel Buttini, Akihiko Kodama, Venkata P. Satagopam, Serge Eifes, Antonio del Sol, Reinhard Schneider, Hiroaki Kitano, Rudi Balling<sup>#</sup>*

# corresponding author:

Luxembourg Centre for Systems Biomedicine (LCSB), University of Luxembourg

7, avenue des Hauts-Fourneaux, L-4362 Esch-sur-Alzette

Tel: 0352-466644-6922 (office); 0352-621168-425 (mobile)

Fax: +352-466644-6949

Email: [rudi.balling@uni.lu](mailto:rudi.balling@uni.lu)

## Supplementary Table 2: Intermodular communication in PD map

This file contains the list of PD map elements prioritized according to their intermodular communication in the PD map. P value and Z-score are calculated on the basis of a given element participating in different modules (subnetworks) in the map. The module classes are the according to article: Guimerà, R., Sales-Pardo, M. & Amaral, L. A. N. Classes of complex networks defined by role-to-role connectivity profiles. Nature Physics 3, 63–69 (2007).

### Intermodular communication class

- R1: Ultra peripheral - All links within one module
- R2: Peripheral - Most links within one module
- R3: Satellite connector - High fraction of links to multiple modules
- R4: Kinless node - Links homogenously distributed among all modules
- R5: Provincial hub - Most links within own module
- R6: Connector hub - Many links to most of other modules
- R7: Global hub - Links homogenously distributed among all modules

| name                  | P | z    | class   |
|-----------------------|---|------|---------|
| H2O2                  |   | 0.71 | 5.41 R6 |
| PINK1:PARK2           |   | 0.69 | 3.2 R6  |
| 26S hybrid proteasome |   | 0.56 | 2.87 R6 |
| CoA-SH                |   | 0.52 | 6.18 R6 |
| L-Lactate             |   | 0.5  | 3 R6    |
| ubiquitin             |   | 0.45 | 5.84 R6 |
| 2-Oxoglutarate        |   | 0.43 | 3.75 R6 |
| Acetyl-CoA            |   | 0.42 | 2.52 R6 |
| SNCA (protfibril)     |   | 0.42 | 4.1 R6  |

|                       |      |          |
|-----------------------|------|----------|
| H2O2                  | 0.38 | 3.14 R6  |
| O2-                   | 0.38 | 3.14 R6  |
| MAPK8                 | 0.34 | 2.84 R6  |
| extracellular exosome | 0.33 | 4.53 R6  |
| Dopamine              | 0.3  | 2.5 R6   |
| activated LRRK2       | 0.15 | 4.95 R5a |
| GADD45G               | 1    | -0.37 R4 |
| GADD45B               | 1    | -0.37 R4 |
| BCL6                  | 1    | -0.37 R4 |
| BTG2                  | 1    | -0.37 R4 |
| ATF3                  | 1    | -0.37 R4 |
| PPARGC1A              | 1    | -0.37 R4 |
| SLC25A5               | 1    | -0.37 R4 |
| SLC25A4               | 1    | -0.37 R4 |
| SDHB                  | 1    | -0.37 R4 |
| SDHA                  | 1    | -0.37 R4 |
| NDUFS5                | 1    | -0.37 R4 |
| NDUFS3                | 1    | -0.37 R4 |
| NDUFC1                | 1    | -0.37 R4 |
| COX7B                 | 1    | -0.37 R4 |
| NDUFB5                | 1    | -0.37 R4 |
| NDUFB3                | 1    | -0.37 R4 |
| NDUFAB1               | 1    | -0.37 R4 |
| NDUFA8                | 1    | -0.37 R4 |
| ATP5C1                | 1    | -0.37 R4 |
| ATP5D                 | 1    | -0.37 R4 |
| ATP5L                 | 1    | -0.37 R4 |
| ATP5O                 | 1    | -0.37 R4 |
| COX5B                 | 1    | -0.37 R4 |
| COX6A1                | 1    | -0.37 R4 |
| COX7A2                | 1    | -0.37 R4 |
| COX7A2L               | 1    | -0.37 R4 |

|                                      |      |          |
|--------------------------------------|------|----------|
| COX7C                                | 1    | -0.37 R4 |
| CYCS                                 | 1    | -0.37 R4 |
| ATP5A1                               | 1    | -0.37 R4 |
| UQCRC1                               | 1    | -0.37 R4 |
| UQCRB                                | 1    | -0.37 R4 |
| NDUFB6                               | 1    | -0.37 R4 |
| COX7A1                               | 1    | -0.37 R4 |
| SIRT3                                | 1    | -0.37 R4 |
| SLC25A14                             | 1    | -0.37 R4 |
| SLC25A27                             | 1    | -0.37 R4 |
| PTGS2                                | 1    | -1.32 R4 |
| ATP                                  | 0.83 | -0.98 R4 |
| GK                                   | 0.82 | -0.11 R4 |
| Glycerol                             | 0.82 | -0.11 R4 |
| PKLR                                 | 0.82 | -1.45 R4 |
| PFKM                                 | 0.82 | -1.45 R4 |
| PFKL                                 | 0.82 | -1.45 R4 |
| H+                                   | 0.82 | -1.11 R4 |
| PAK2                                 | 0.82 | -0.28 R4 |
| MAPK1                                | 0.81 | -0.11 R4 |
| ADP                                  | 0.81 | -1.33 R4 |
| paraquat                             | 0.8  | -0.71 R3 |
| Raf/Mek                              | 0.8  | 0.32 R3  |
| Cytochrome C:Apaf-1:ATP:Procaspase-9 | 0.8  | 0.8 R3   |
| CASP3                                | 0.79 | 0.13 R3  |
| HOO•                                 | 0.78 | -0.28 R3 |
| O <sub>2</sub> <sup>-</sup>          | 0.78 | -3.13 R3 |
| G3P                                  | 0.78 | 2.02 R3  |
| ACC1                                 | 0.78 | -0.91 R3 |
| HCO <sub>3</sub> <sup>-</sup>        | 0.78 | -0.91 R3 |
| GCK                                  | 0.78 | -1.05 R3 |
| HK1                                  | 0.78 | -1.05 R3 |

|                                 |      |          |
|---------------------------------|------|----------|
| caspase-7                       | 0.78 | 0.13 R3  |
| CASP7                           | 0.78 | 0.13 R3  |
| PAK2 (p34)                      | 0.78 | 0.24 R3  |
| ATXN3                           | 0.78 | -0.05 R3 |
| H+                              | 0.78 | -0.55 R3 |
| Apoptosome                      | 0.76 | 0.47 R3  |
| PAK2 (p34)                      | 0.76 | 0.76 R3  |
| CACNA1D                         | 0.75 | -1.44 R3 |
| UPS                             | 0.75 | -1.57 R3 |
| ACC2                            | 0.74 | -0.68 R3 |
| Oxaloacetate                    | 0.74 | -0.68 R3 |
| Citrate lyase                   | 0.74 | -0.68 R3 |
| Citrate                         | 0.74 | -0.68 R3 |
| beta-D-Glucose                  | 0.74 | -0.64 R3 |
| Phosphoenolpyruvate             | 0.74 | -0.64 R3 |
| ROS                             | 0.74 | -0.97 R3 |
| UBL-acyl adenylate intermediate | 0.74 | 0.74 R3  |
| SNCA oligomer                   | 0.74 | 0.74 R3  |
| SNCA (A30P)                     | 0.74 | 0.74 R3  |
| SNCA (A53T)                     | 0.74 | 0.74 R3  |
| ATP-dependent unfoldase         | 0.74 | 0.74 R3  |
| PAK2                            | 0.74 | 0.76 R3  |
| ROS                             | 0.73 | 0.24 R3  |
| Acetyl-CoA                      | 0.73 | 0.92 R3  |
| CRTC1                           | 0.73 | -0.05 R3 |
| AMPK                            | 0.73 | 0.32 R3  |
| MAP3K5                          | 0.73 | 0.24 R3  |
| Pyruvate                        | 0.73 | 0.71 R3  |
| H+                              | 0.73 | -1.65 R3 |
| stearoyl-CoA                    | 0.72 | -0.68 R3 |
| Akt pathway                     | 0.72 | -0.11 R3 |
| calcineurin                     | 0.72 | -1.1 R3  |

|                                    |      |          |
|------------------------------------|------|----------|
| BCL2:VDAC1                         | 0.72 | -0.2 R3  |
| SNCA                               | 0.72 | -0.27 R3 |
| PPP2CA                             | 0.72 | -0.55 R3 |
| MAPT (fragment 422-758)            | 0.72 | -0.2 R3  |
| MAPT (fragment 2-421)              | 0.72 | -0.2 R3  |
| VDAC1                              | 0.72 | -0.2 R3  |
| BCL2                               | 0.72 | -0.98 R3 |
| Ca <sup>2+</sup>                   | 0.72 | -0.82 R3 |
| Dopa-quinone SNCA adduct           | 0.72 | -0.55 R3 |
| Dopamine-quinone SNCA adduct       | 0.72 | -0.55 R3 |
| SNCA                               | 0.72 | -0.58 R3 |
| s5319                              | 0.72 | -0.11 R3 |
| Ca channel:RIMBP                   | 0.72 | -0.55 R3 |
| UNC13B                             | 0.72 | -0.55 R3 |
| permiable pore                     | 0.72 | -0.27 R3 |
| NADP <sup>+</sup>                  | 0.71 | -0.68 R3 |
| alpha-D-Glucose                    | 0.7  | -0.24 R3 |
| DUB                                | 0.7  | 1.17 R3  |
| IKK complex                        | 0.69 | 0.76 R3  |
| H <sub>2</sub> O                   | 0.69 | 0.66 R3  |
| SNCA                               | 0.69 | -0.22 R3 |
| Ca <sup>2+</sup>                   | 0.69 | 0.91 R3  |
| SNCA                               | 0.69 | -1.32 R3 |
| BECN1                              | 0.69 | -0.95 R3 |
| SLC16A3:BSG                        | 0.69 | -0.64 R3 |
| SLC16A1:BSG                        | 0.69 | -0.64 R3 |
| lactate dehydrogenase AB3 complex  | 0.69 | -0.24 R3 |
| lactate dehydrogenase A2B2 complex | 0.69 | -0.24 R3 |
| lactate dehydrogenase A4 complex   | 0.69 | -0.24 R3 |
| lactate dehydrogenase B4 complex   | 0.69 | -0.24 R3 |
| lactate dehydrogenase A3B complex  | 0.69 | -0.24 R3 |
| SLC16A8:BSG                        | 0.69 | -0.64 R3 |

|                                                   |      |          |
|---------------------------------------------------|------|----------|
| Mitochondrial permeability transition pore (open) | 0.69 | -0.3 R3  |
| Peroxides                                         | 0.69 | 0.76 R3  |
| Fe(III)                                           | 0.68 | -1.23 R3 |
| EPB41L1                                           | 0.68 | 2.36 R3  |
| AKAP5                                             | 0.68 | 2.36 R3  |
| DOPAL                                             | 0.68 | 1.28 R3  |
| SOD1                                              | 0.67 | -1.47 R3 |
| 3-hydroxyoctadecanoyl-CoA                         | 0.67 | -0.22 R3 |
| NADP+                                             | 0.67 | -0.57 R3 |
| Ca <sup>2+</sup>                                  | 0.67 | -1 R3    |
| AMPA receptor ligand complex                      | 0.67 | -0.75 R3 |
| Free Fatty Acid                                   | 0.67 | -0.58 R3 |
| Purine Nucleotide                                 | 0.67 | -0.58 R3 |
| misfolded SNCA                                    | 0.67 | 2.35 R3  |
| Apoptosis                                         | 0.67 | -1.07 R3 |
| docked synaptic vesicle                           | 0.67 | 0.06 R3  |
| CYCS                                              | 0.67 | -0.05 R3 |
| RHOT2                                             | 0.67 | -0.54 R3 |
| RHOT1                                             | 0.67 | -0.54 R3 |
| arachidonoyl-CoA                                  | 0.66 | -0.22 R3 |
| ubiquinol, cytochrome-c reductase (complex III)   | 0.66 | -0.3 R3  |
| MYO6                                              | 0.66 | 0.63 R3  |
| DLG1                                              | 0.66 | 0.63 R3  |
| TARP:DLG4:MDM2                                    | 0.66 | 0.63 R3  |
| AMPA receptors containing GluR2 (homomers)        | 0.66 | 0.63 R3  |
| Orthophosphate                                    | 0.66 | -1.66 R3 |
| beta-D-Fructose 6-phosphate                       | 0.66 | 0.17 R3  |
| ALDH2                                             | 0.66 | -0.1 R3  |
| MAPK1                                             | 0.66 | 0.53 R3  |
| NH <sub>3</sub>                                   | 0.66 | 0.67 R3  |
| H <sub>2</sub> O <sub>2</sub>                     | 0.66 | 0.67 R3  |
| MAPT                                              | 0.66 | -0.86 R3 |

|                                      |      |          |
|--------------------------------------|------|----------|
| Palmitate                            | 0.65 | 0.46 R3  |
| isocitrate dehydrogenase             | 0.65 | 0.1 R3   |
| NNT dimer                            | 0.65 | -0.51 R3 |
| NADPH                                | 0.65 | -0.58 R3 |
| NAD+                                 | 0.65 | -0.58 R3 |
| F0F1-ATP synthase (complex V)        | 0.64 | -0.71 R3 |
| ROS                                  | 0.64 | 0.91 R3  |
| H+                                   | 0.64 | -0.24 R3 |
| L-Lactate                            | 0.64 | -0.24 R3 |
| NADH-Q oxireductase (complex I)      | 0.64 | 0.1 R3   |
| CaMKII                               | 0.63 | 0.98 R3  |
| Pyruvate                             | 0.63 | 2.19 R3  |
| OH•                                  | 0.62 | 0.66 R3  |
| GSR                                  | 0.62 | -4.08 R3 |
| PRDX4                                | 0.62 | -4.08 R3 |
| PRDX5                                | 0.62 | -4.08 R3 |
| PRDX3                                | 0.62 | -4.08 R3 |
| PRDX2                                | 0.62 | -4.08 R3 |
| PRDX1                                | 0.62 | -4.08 R3 |
| CAT                                  | 0.62 | -4.08 R3 |
| UCP3                                 | 0.62 | -0.71 R3 |
| UCP2                                 | 0.62 | -0.71 R3 |
| beta-D-Glucose 6-phosphate           | 0.62 | 0.57 R3  |
| beta-D-Fructose 1,6-bisphosphate     | 0.62 | 0.57 R3  |
| VDAC1                                | 0.62 | -0.22 R3 |
| SIRT3                                | 0.62 | 0.27 R3  |
| VDAC1                                | 0.62 | -0.95 R3 |
| DNM1L                                | 0.62 | -0.71 R3 |
| MAPT                                 | 0.62 | -0.82 R3 |
| Caspase-2                            | 0.62 | -0.28 R3 |
| tBID:BCL-2                           | 0.62 | -0.28 R3 |
| phospho-dynein(DLC2) on microtubules | 0.62 | -0.2 R3  |



|                                      |      |          |
|--------------------------------------|------|----------|
| phospho-dynein(DLC1) on microtubules | 0.62 | -0.2 R3  |
| Bcl2:BH3-only protein complex        | 0.62 | -0.28 R3 |
| GPX4                                 | 0.62 | -1.07 R3 |
| GPX1                                 | 0.62 | -1.07 R3 |
| PRDX4                                | 0.62 | -1.07 R3 |
| PRDX5                                | 0.62 | -1.07 R3 |
| PRDX3                                | 0.62 | -1.07 R3 |
| PRDX2                                | 0.62 | -1.07 R3 |
| PRDX1                                | 0.62 | -1.07 R3 |
| CAT                                  | 0.62 | -1.07 R3 |
| s5073                                | 0.62 | -0.55 R3 |
| s4933                                | 0.62 | -0.27 R3 |
